# Supplementary material for: Adaptive ionic liquid polymer microwave modulation surface with reprogrammable dielectric properties
Source: Research Square preprint supplement (doi:10.21203/rs.3.rs-7444154/v1), 2025-09-03
Supplement: Supplementary file 1 [file cf4102ff984a684244c7222d.docx]

Supplementary Materials

**Adaptive ionic liquid polymer microwave modulation surface with reprogrammable dielectric properties**

Qichao Dong1,2, Zhehui Wang3, Hanyu Qiu4, Xiaofeng Gong5, Huying Yan1, Zengyong Chu5,6,*, Tao Luo3,*, Haipeng Lu1,2,*, Longjiang Deng1,2.

1 National Engineering Research Center of Electromagnetic Radiation Control Materials, School of Electronic Science and Engineering, University of Electronic Science and Technology of China; Chengdu, 611731, China.

2 Key Laboratory of Multispectral Absorbing Materials and Structures of Ministry of Education, School of Electronic Science and Engineering, University of Electronic Science and Technology of China; Chengdu, 611731, China.

3 Institute of High Performance Computing (IHPC), Agency for Science, Technology and Research (A*STAR), Singapore 138632, Republic of Singapore

4 School of Science and Engineering, The Chinese University of HongKong, Shenzhen, 518172, China

5 College of Science, National University of Defense Technology, Changsha, 410073 P. R. China

6 Science and Technology on Advanced Ceramic Fibers and Composites Laboratory, College of Aerospace Science and Engineering, National University of Defense Technology, Changsha, 410073 P. R. China

E-mail addresses:

Zengyong Chu, Email: chuzy@nudt.edu.cn

Tao Luo, Email: luo_tao@ihpc.a-star.edu.sg

Haipeng Lu, Email: luhaipeng@uestc.edu.cn

Supplementary Text

**The dielectric constant**

Typically, the complex permittivity is a dimensionless magnitude related to the permittivity 1:

(S1)

ε′ is the real part of the permittivity, and ε″ is the imaginary part. Where:

(S2)

(S3)

(S4)

ε''p and ε''c represent the polarization and conductivity losses of dielectric materials, respectively, where σ is the conductivity and ω = 2πf is the angular frequency.

The purpose of the Havriliak-Negami (H-N) model is to fit and represent the real and imaginary parts of the dielectric constant as functions of frequency, providing a unified description and parameterization of the experimental data 2:

(S5)

Based on the H-N model, ε''p and ε''c at different frequencies can be fitted. As shown in Supplementary Fig. 10.

**Reflection Loss**

According to transmission line theory under metal-backed conditions, the impedance matching coefficient (calculated by Zin/Z0, where Z0 = 376.73 Ω) indicates that when Zin/Z0 is close to 1, electromagnetic wave can enter the IL-P without reflection 3-6. If the conductivity is too high, as per Equation S6, the dielectric constant will increase accordingly, causing Zin/Z0 to deviate from 1, which further leads to reflection of the electromagnetic waves at the air-IL-P interface, making it difficult to achieve excellent microwave absorption performance 7,8. Therefore, conductivity should be maintained within an optimal range, as both too high and too low are not ideal. As shown in Supplementary Fig. 18, the frequencies corresponding to the dashed lines reveal the ideal impedance matching characteristics for different thicknesses.

(S6)

The attenuation constant (α), used to evaluate the loss capability of electromagnetic waves in IL-P, is as follows1,8:

(S7)

The reflection loss (RL) at a specific frequency is used to evaluate the microwave absorption, and the formula is as follows1,8:

(S8)

**Far-field Imaging**

The far-field distance refers to the distance from a radiation source to the receiving point, where the electromagnetic field of the source can be considered as a plane wave (i.e., the electric and magnetic field wavefronts approach a plane, and the wavelength variation is minimal). In antenna theory, the far-field distance is a very important concept, as shown in Supplementary Fig. 20.

is the far-field distance, is the maximum size of the sample, and is the wavelength of the electromagnetic wave.

**Radar Cross Section**

Radar Cross Section (RCS) is measured in dB and serves as a crucial metric for assessing an object's visibility to radar systems, with higher values indicating enhanced detectability. The RCS values can be described as follows 1,8,9:

Supplementary Figure


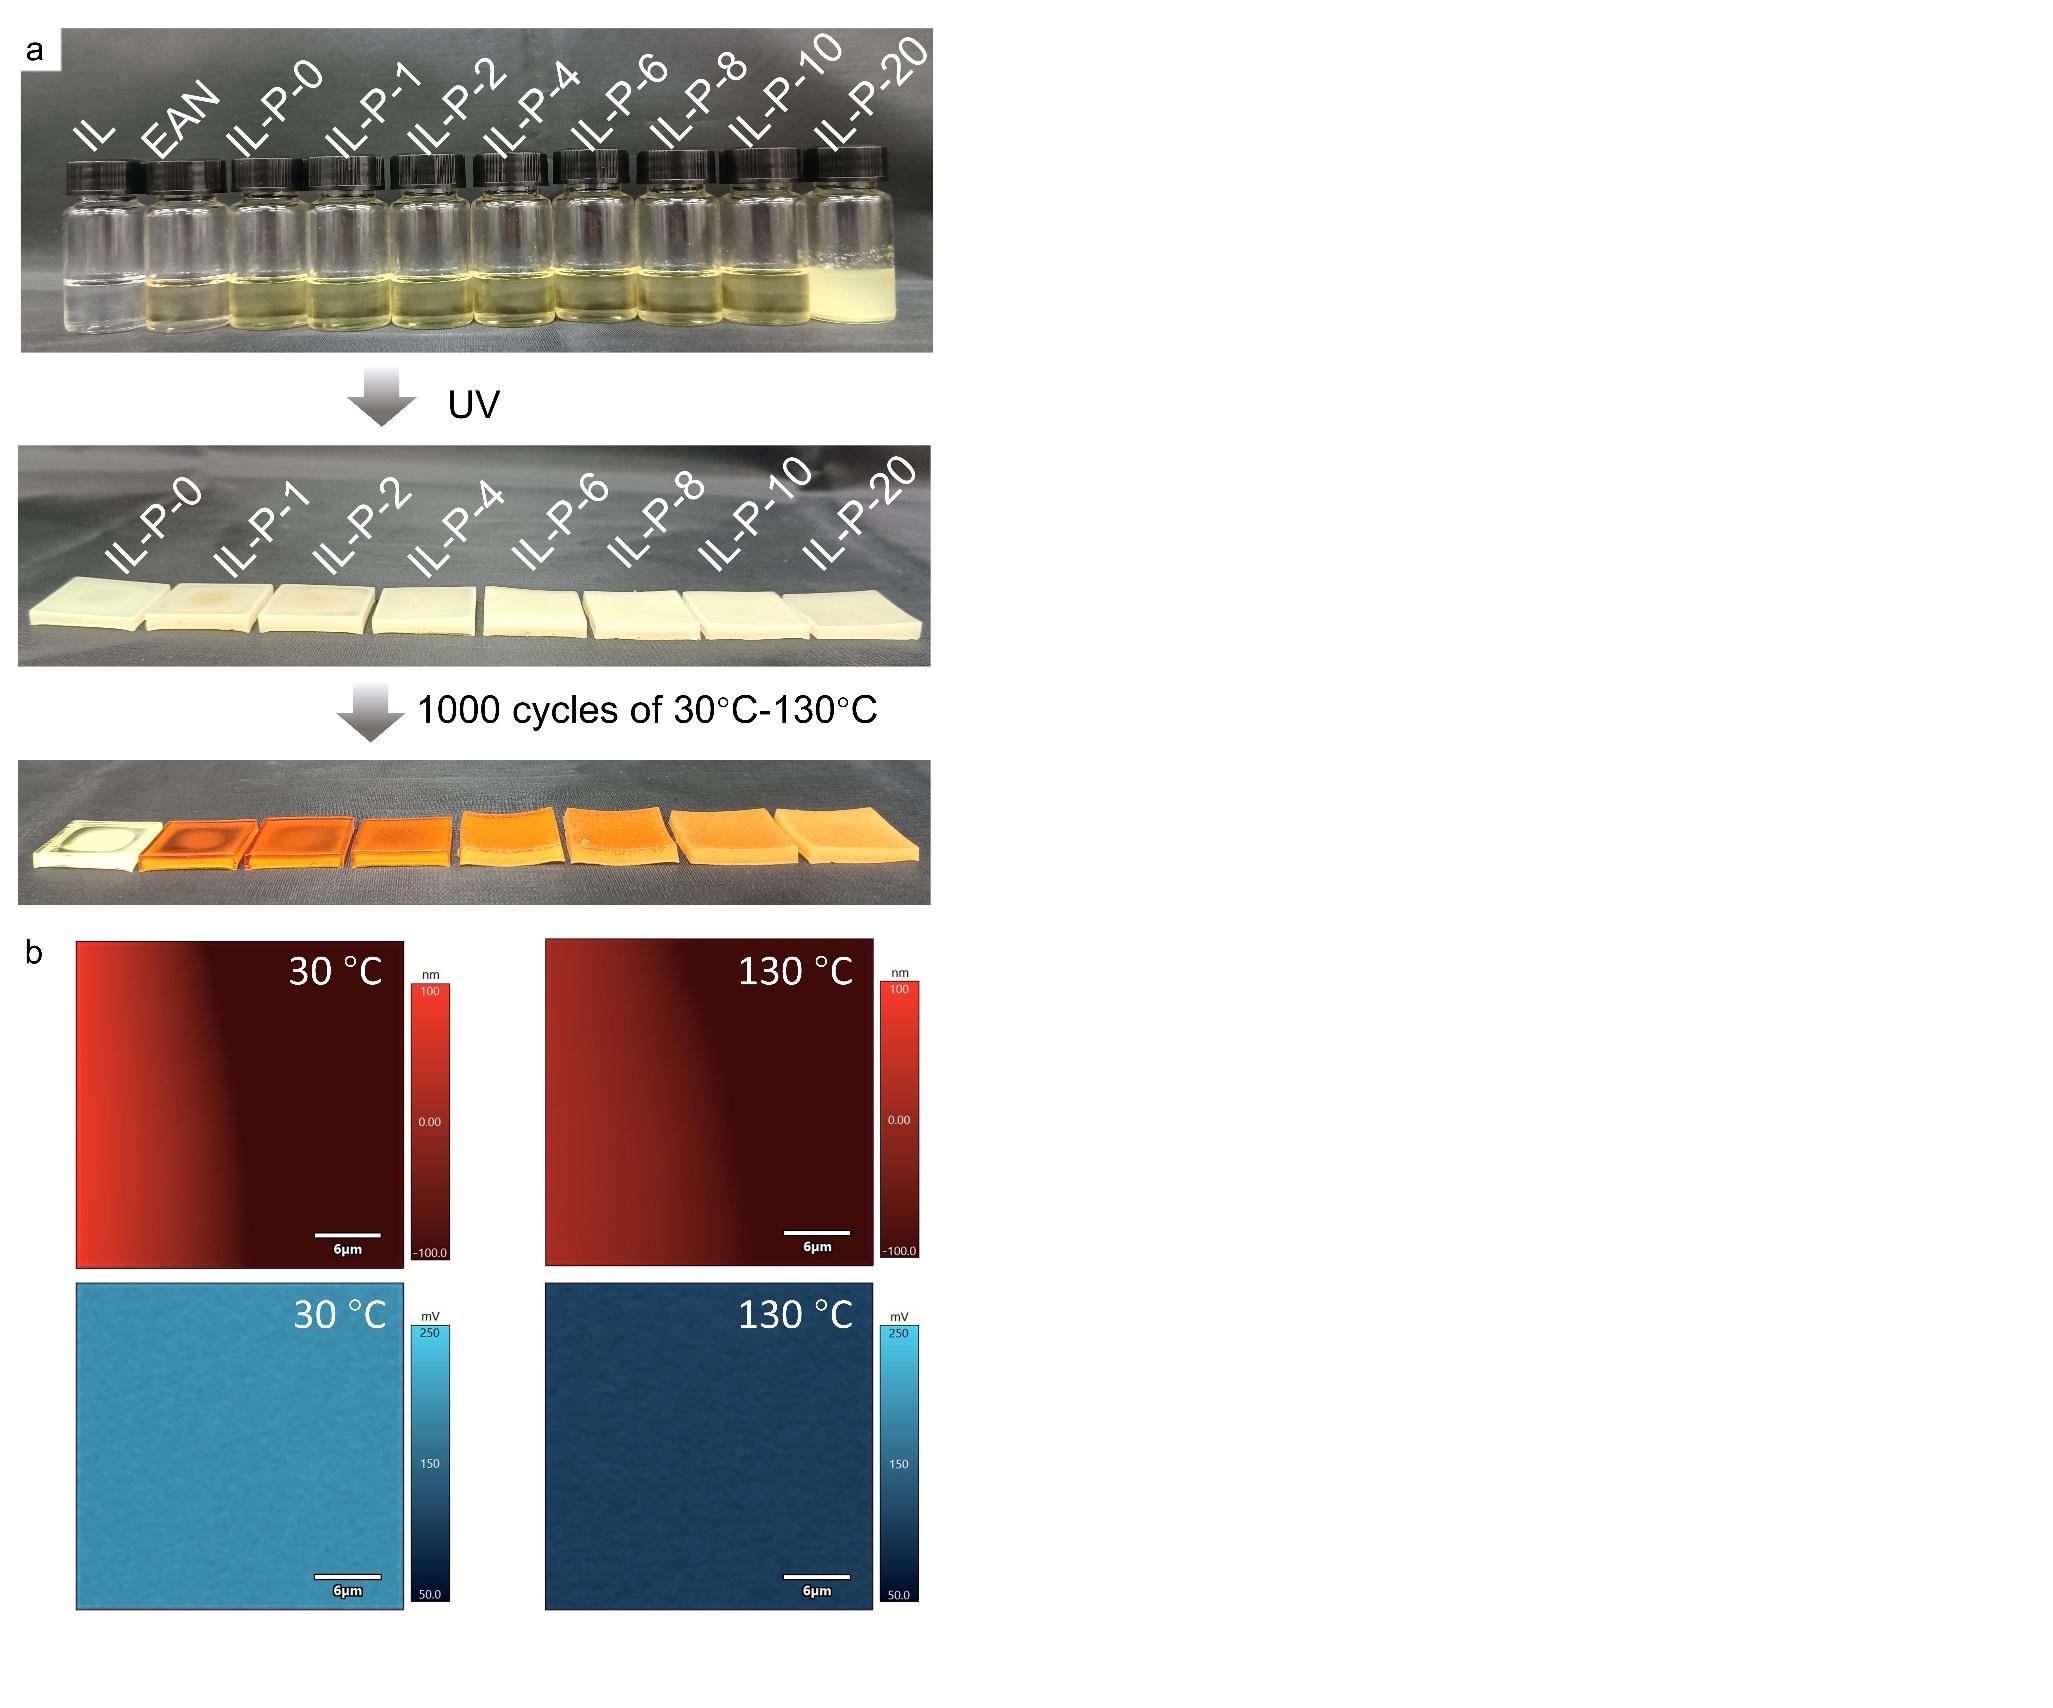


**Supplementary Fig. 1 | Morphology of IL-P. a** Photograph of the IL-P preparation process. **b** KPFM results of the IL-P film on a silicon substrate in the 800 μm × 800 μm area, with the top image showing the morphology and the bottom image showing the surface potential.


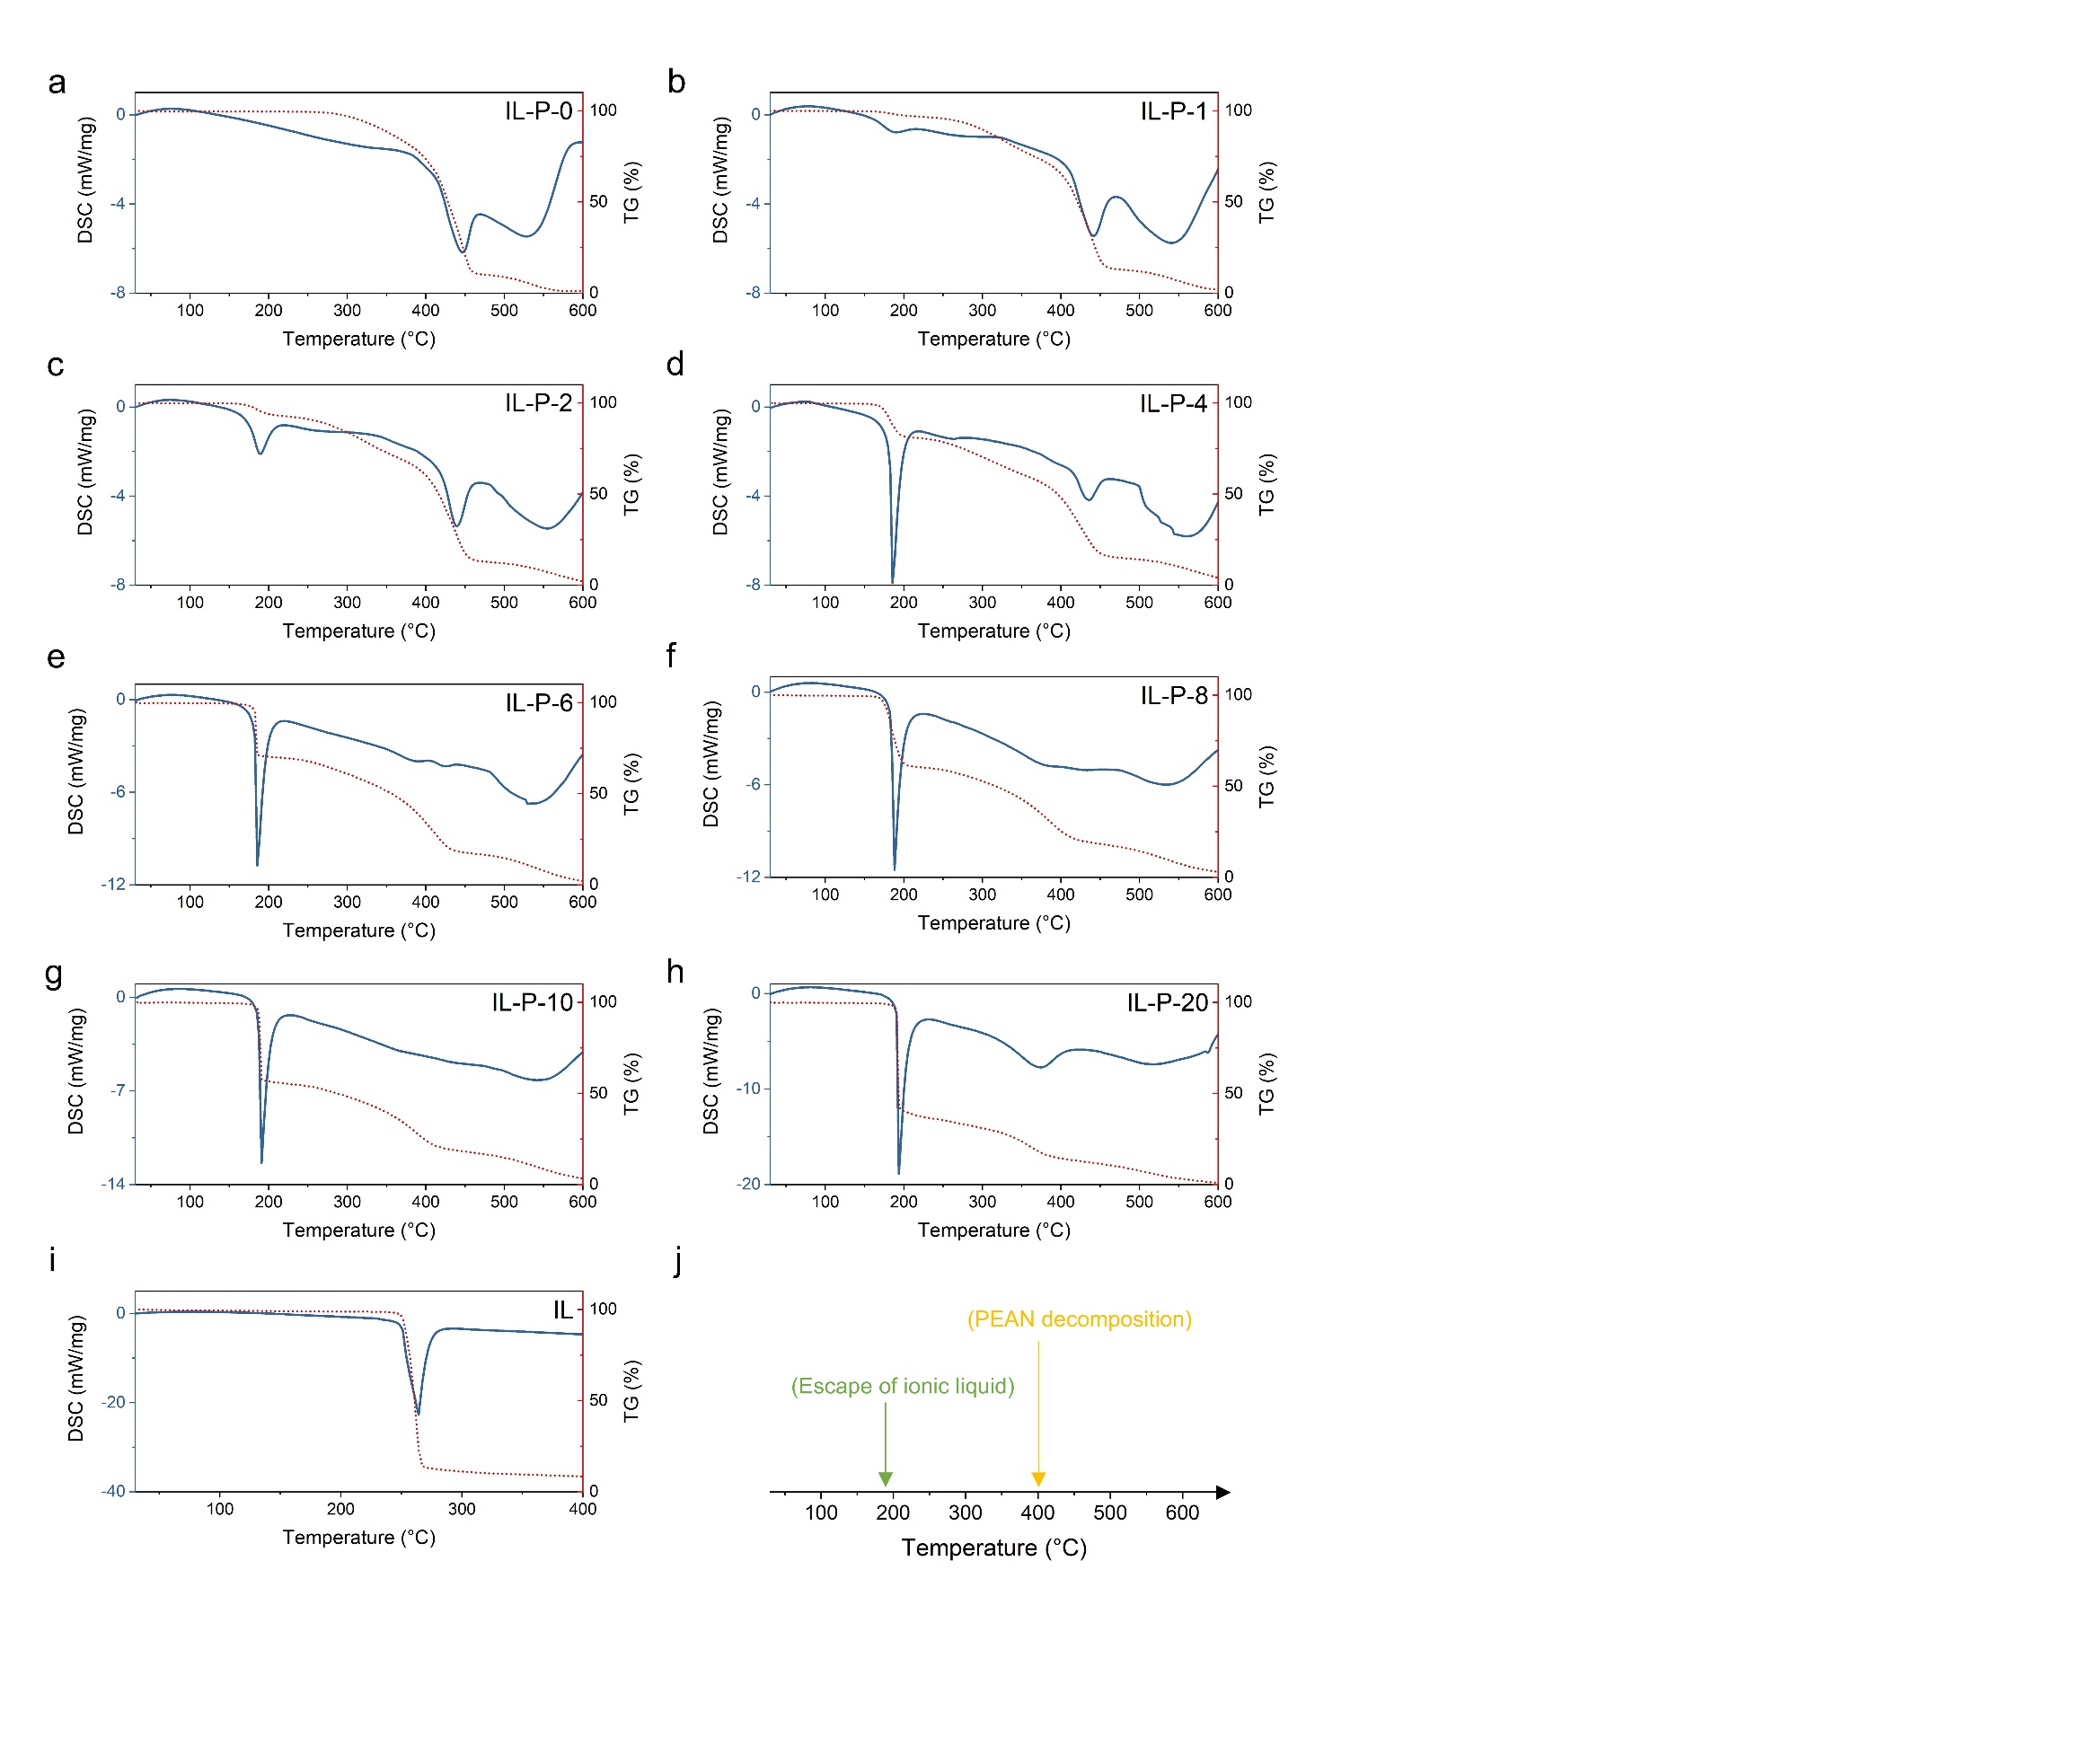


**Supplementary Fig. 2 | Thermogravimetric and differential scanning calorimetry (TG-DSC). a-h** IL-P. **i** IL. **j** Decomposition schematic of IL-P.


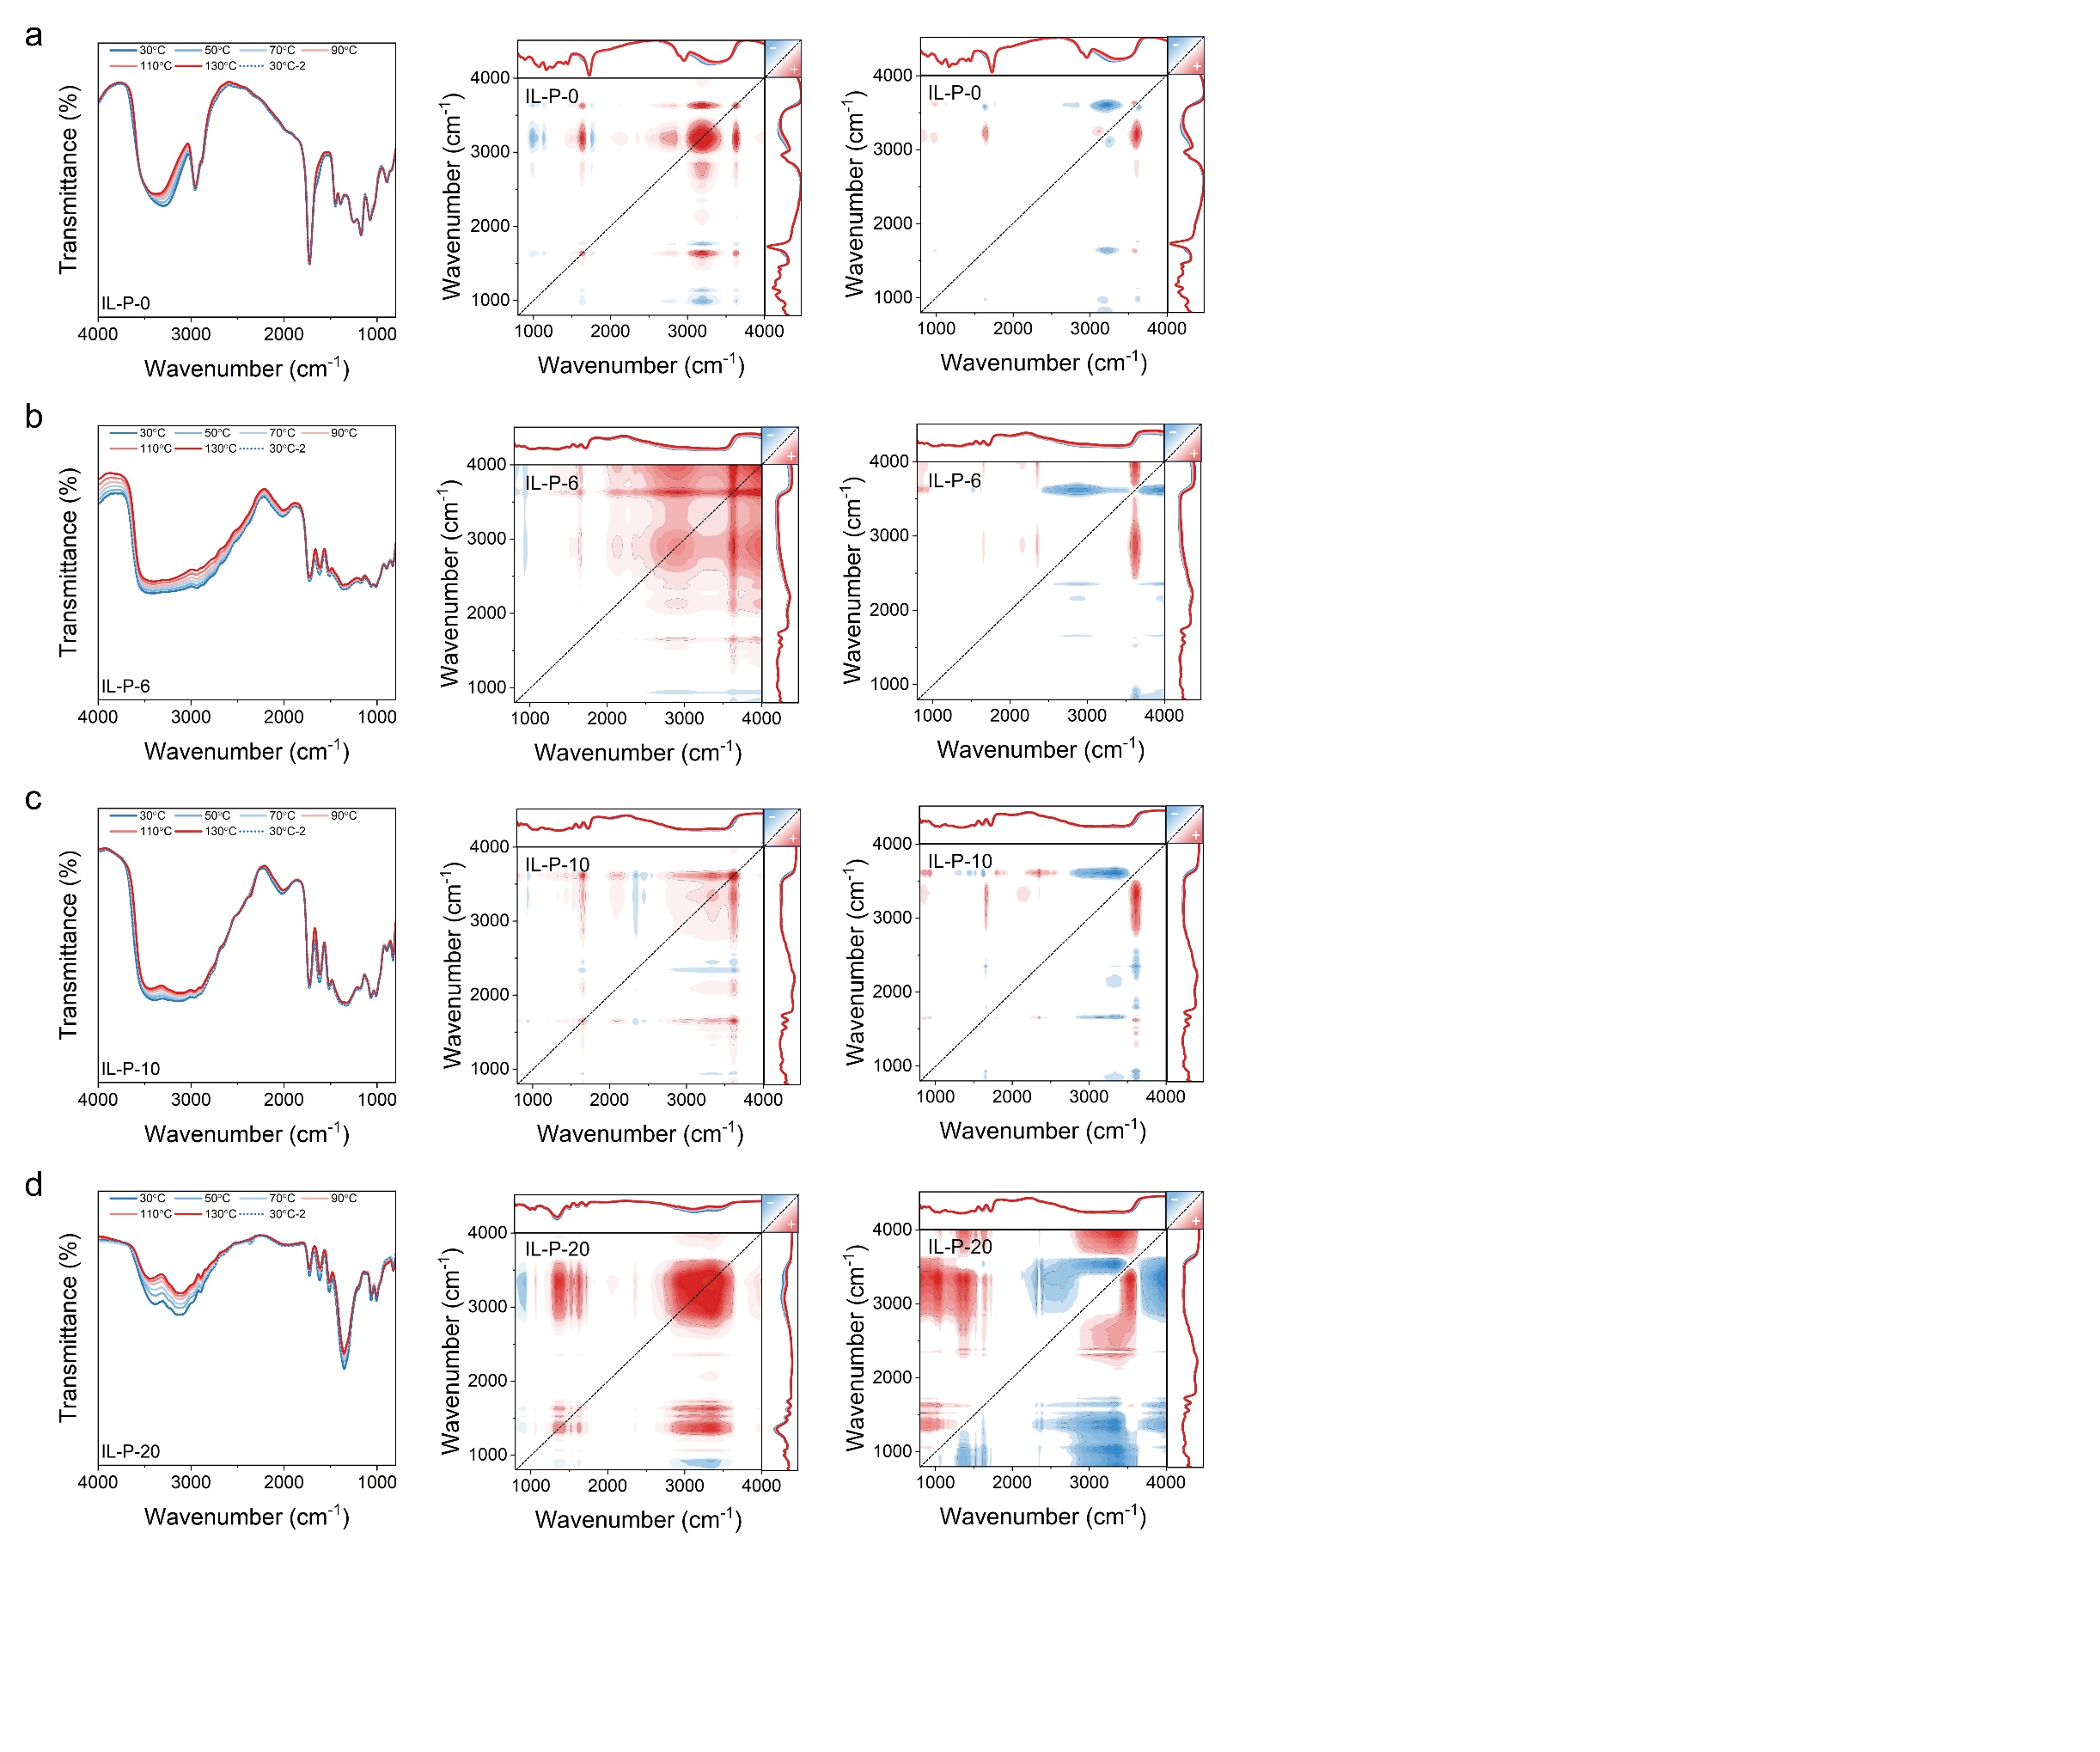


**Supplementary Fig. 3 | In situ variable-temperature Fourier-transform infrared (FTIR), 2D synchronous and asynchronous spectra. a** IL-P-0. **b** IL-P-6. **c** IL-P-10. **d** IL-P-20.


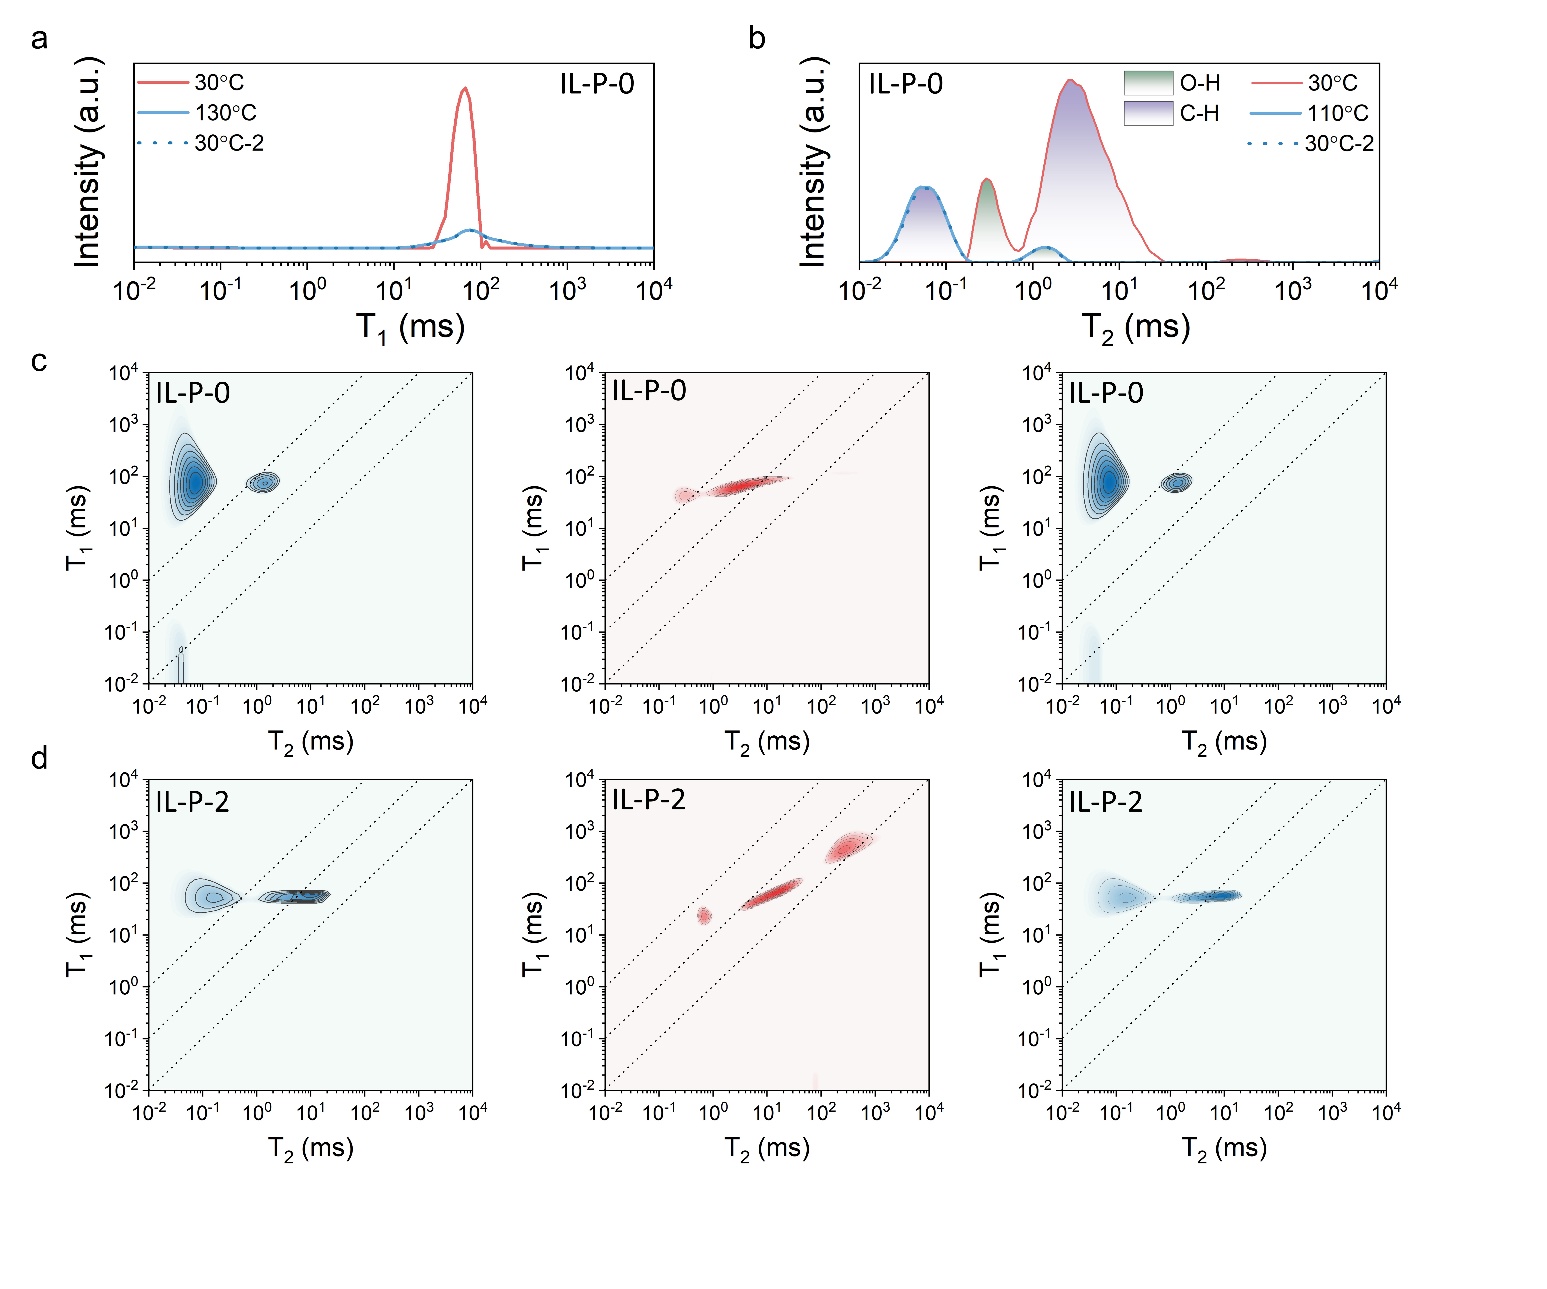


**Supplementary Fig. 4 | In situ variable-temperature ¹H low-field NMR. a, b** T₁ and T₂ spectra of IL-P-0. **c, d** Variable-temperature ¹H low-field 2D NMR of IL-P-0 and IL-P-2, with measurements taken at 30°C, heated to 130°C, and then cooled back to 30°C from left to right.


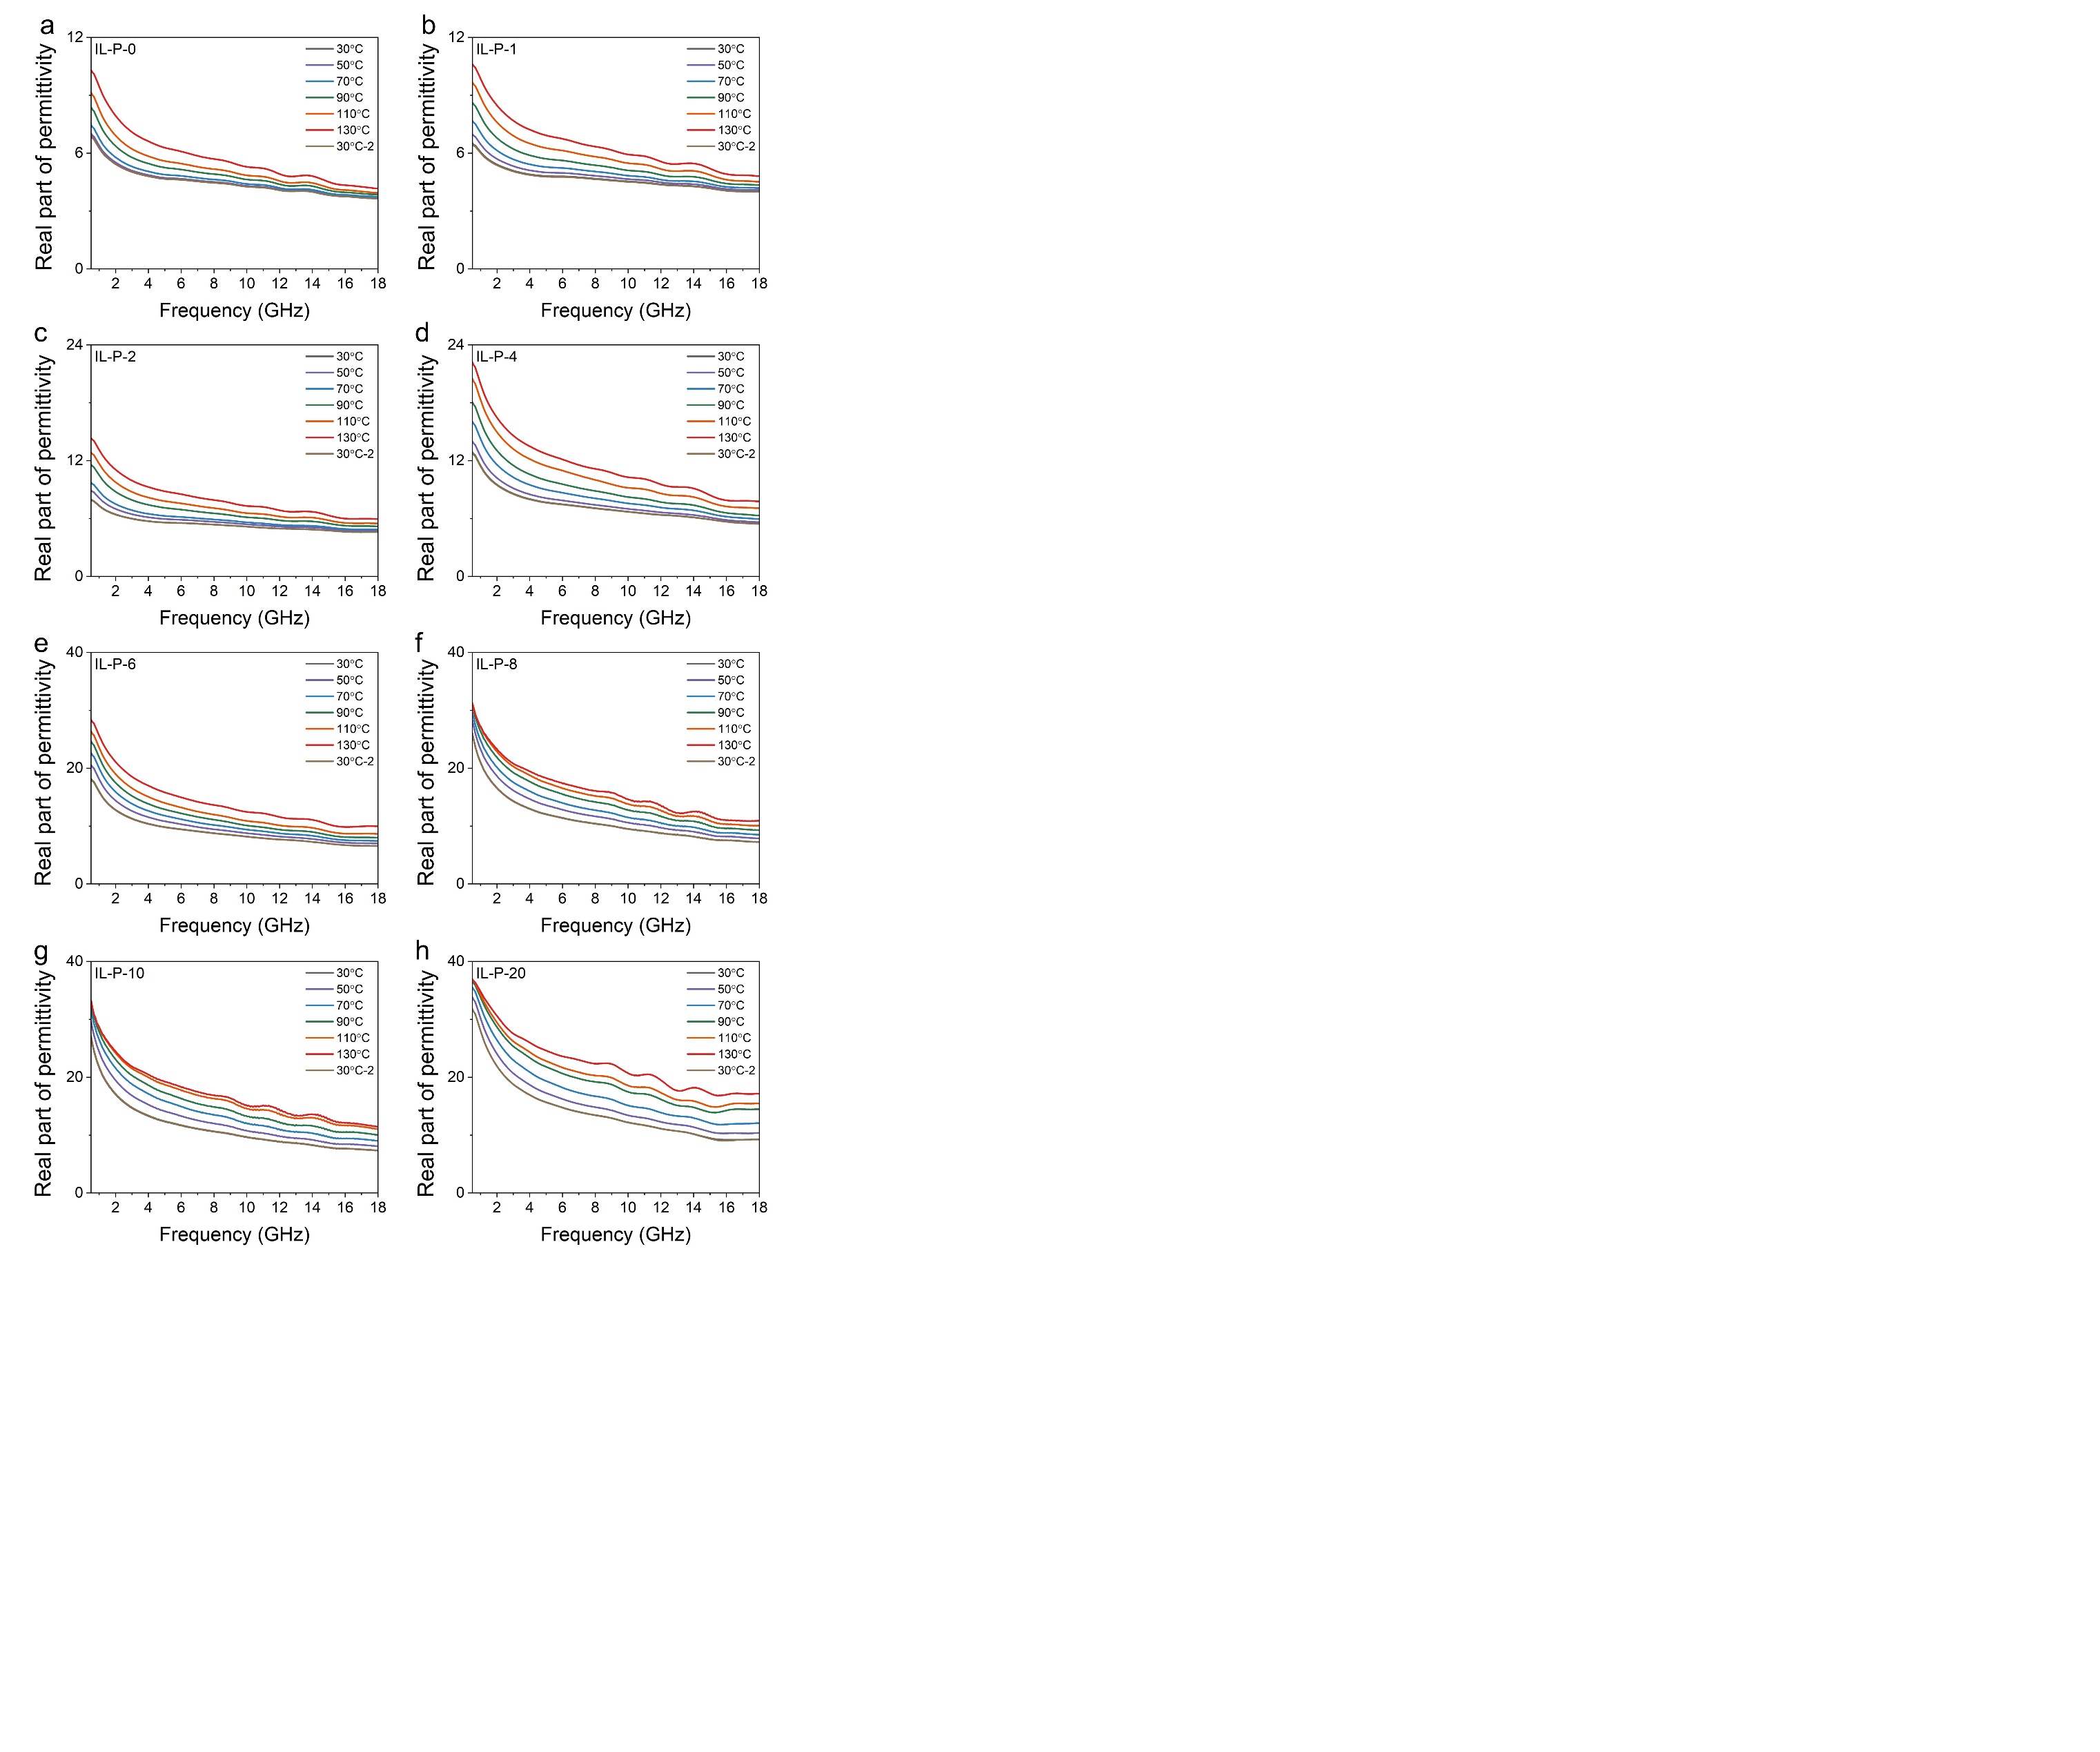


**Supplementary Fig. 5 | Real part of permittivity of IL-P in the 0.5–18 GHz under temperature stimulation. a** IL-P-0. **b** IL-P-1. **c** IL-P-2. **d** IL-P-4. **e** IL-P-6. **f** IL-P-8. **g** IL-P-10. **h** IL-P-20.


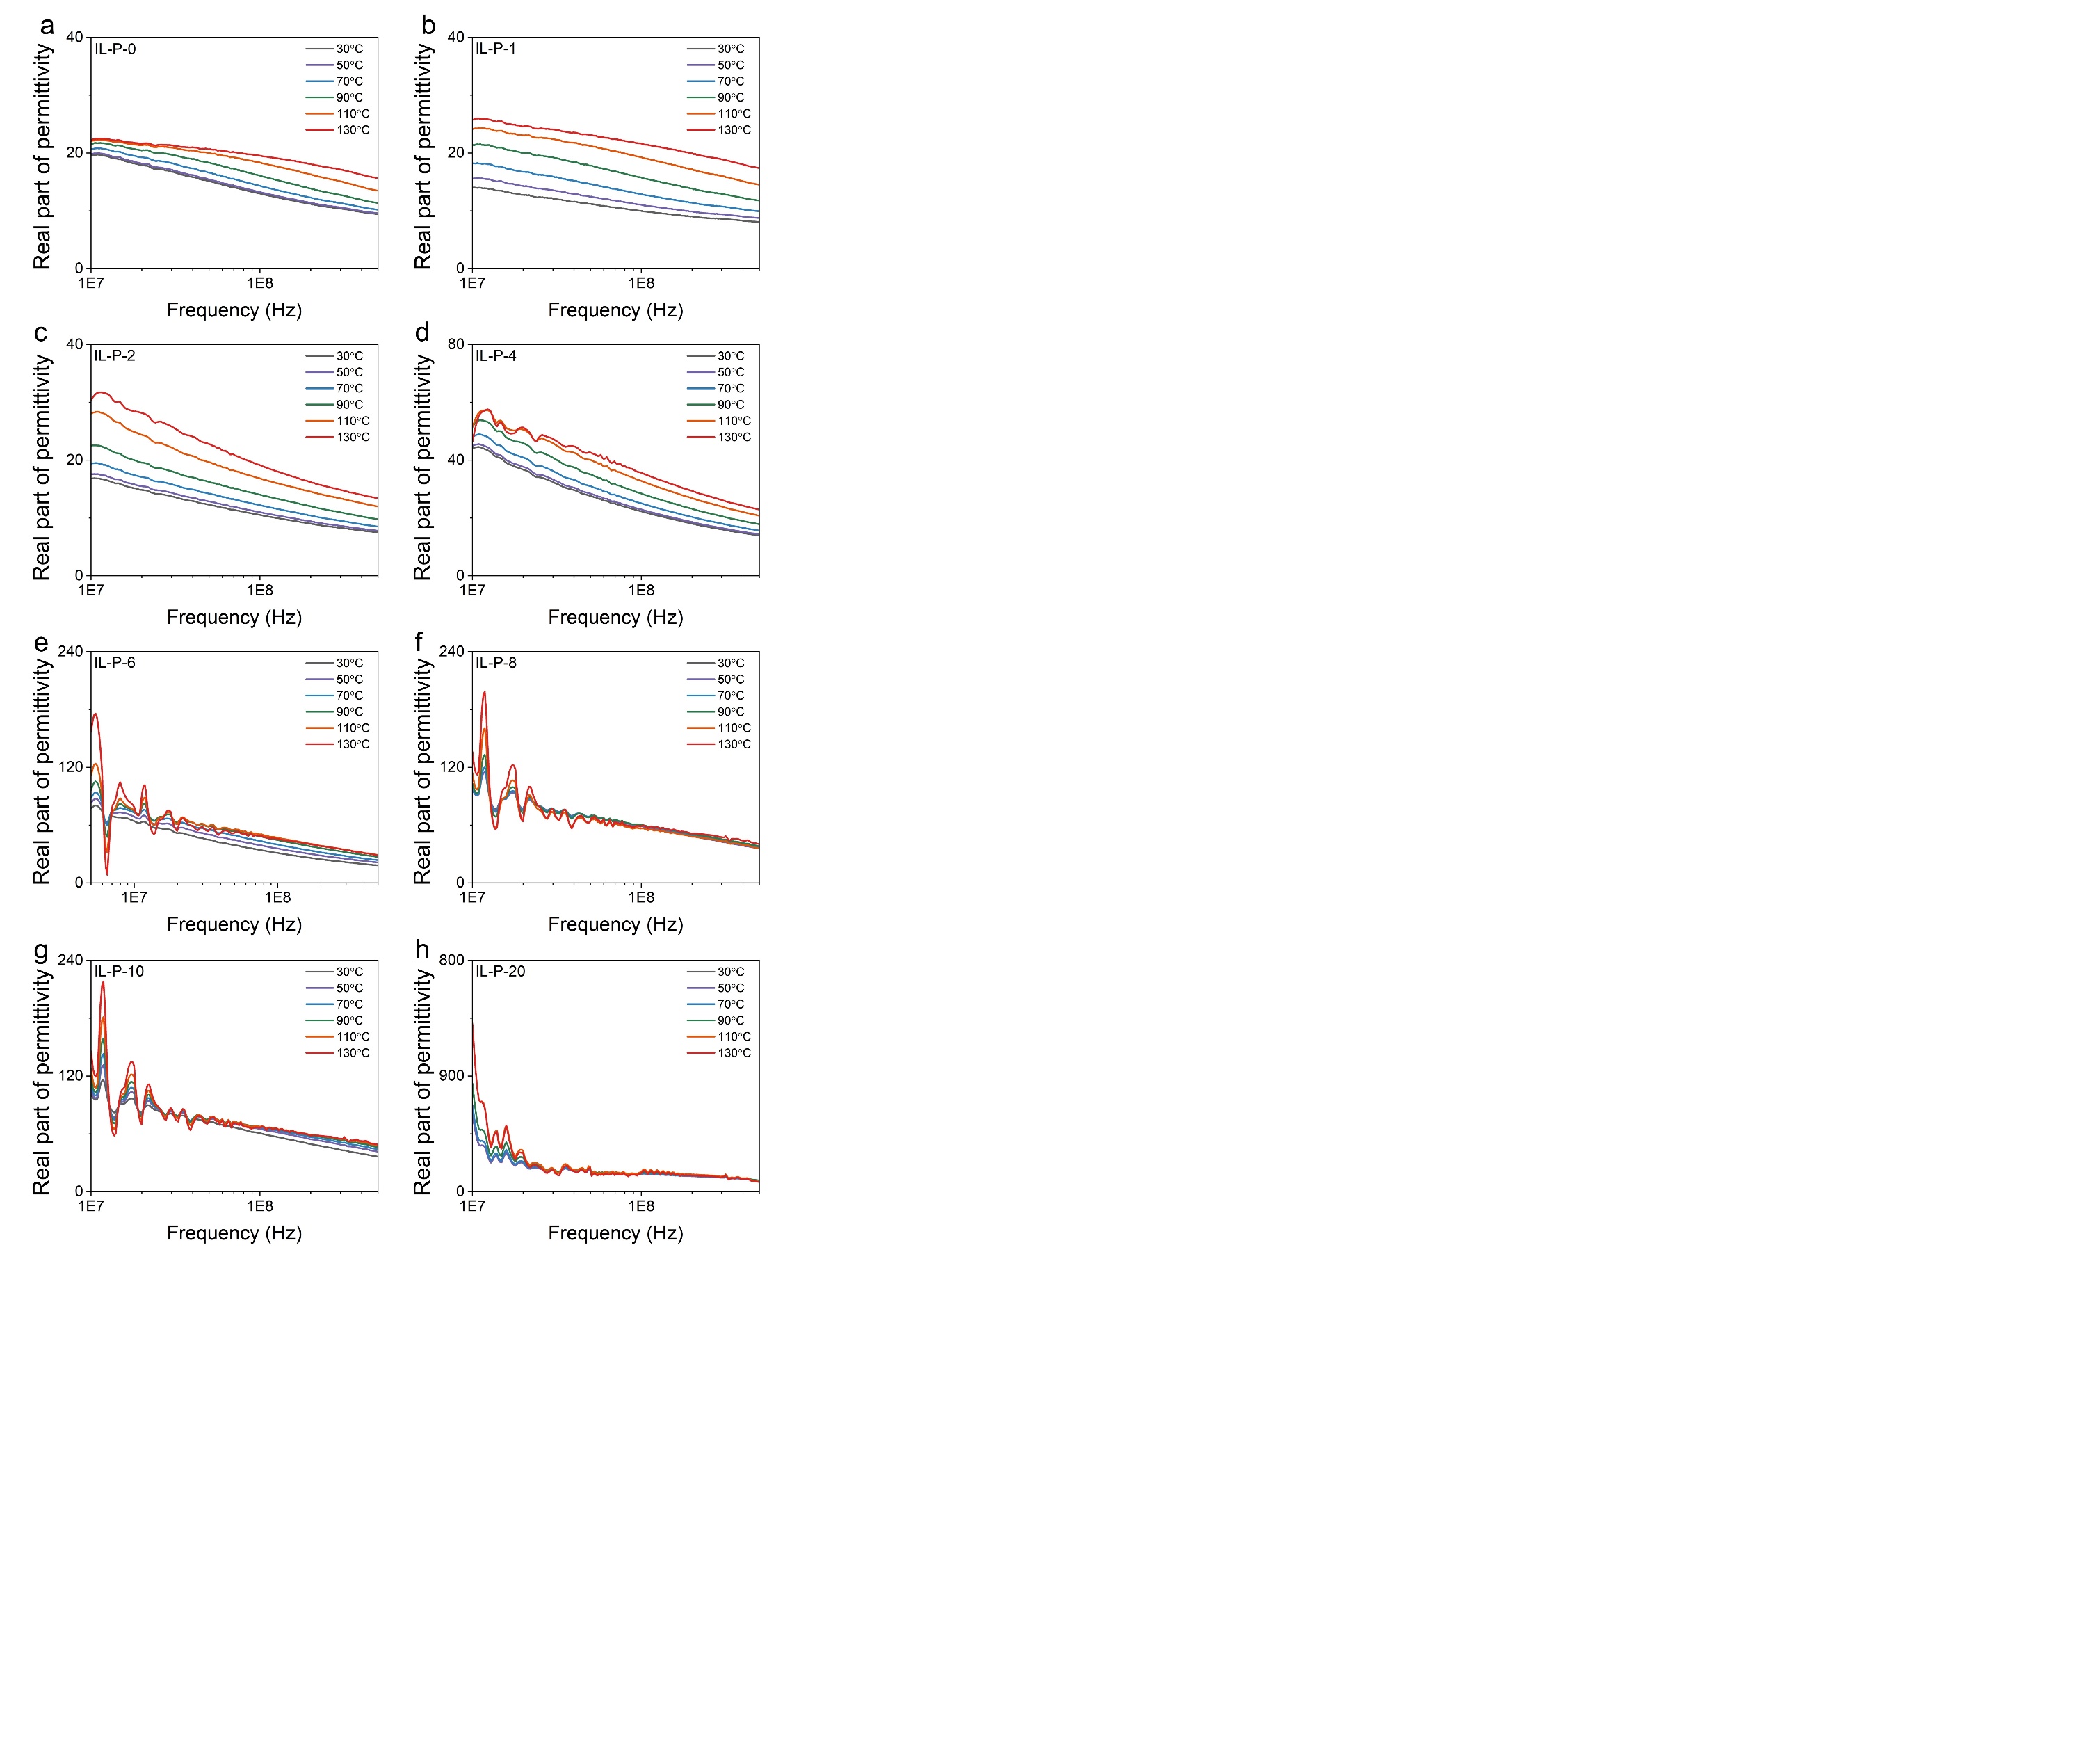


**Supplementary Fig. 6 | Real part of permittivity of IL-P in the 107-5×108 Hz under temperature stimulation. a** IL-P-0. **b** IL-P-1. **c** IL-P-2. **d** IL-P-4. **e** IL-P-6. **f** IL-P-8. **g** IL-P-10. **h** IL-P-20.


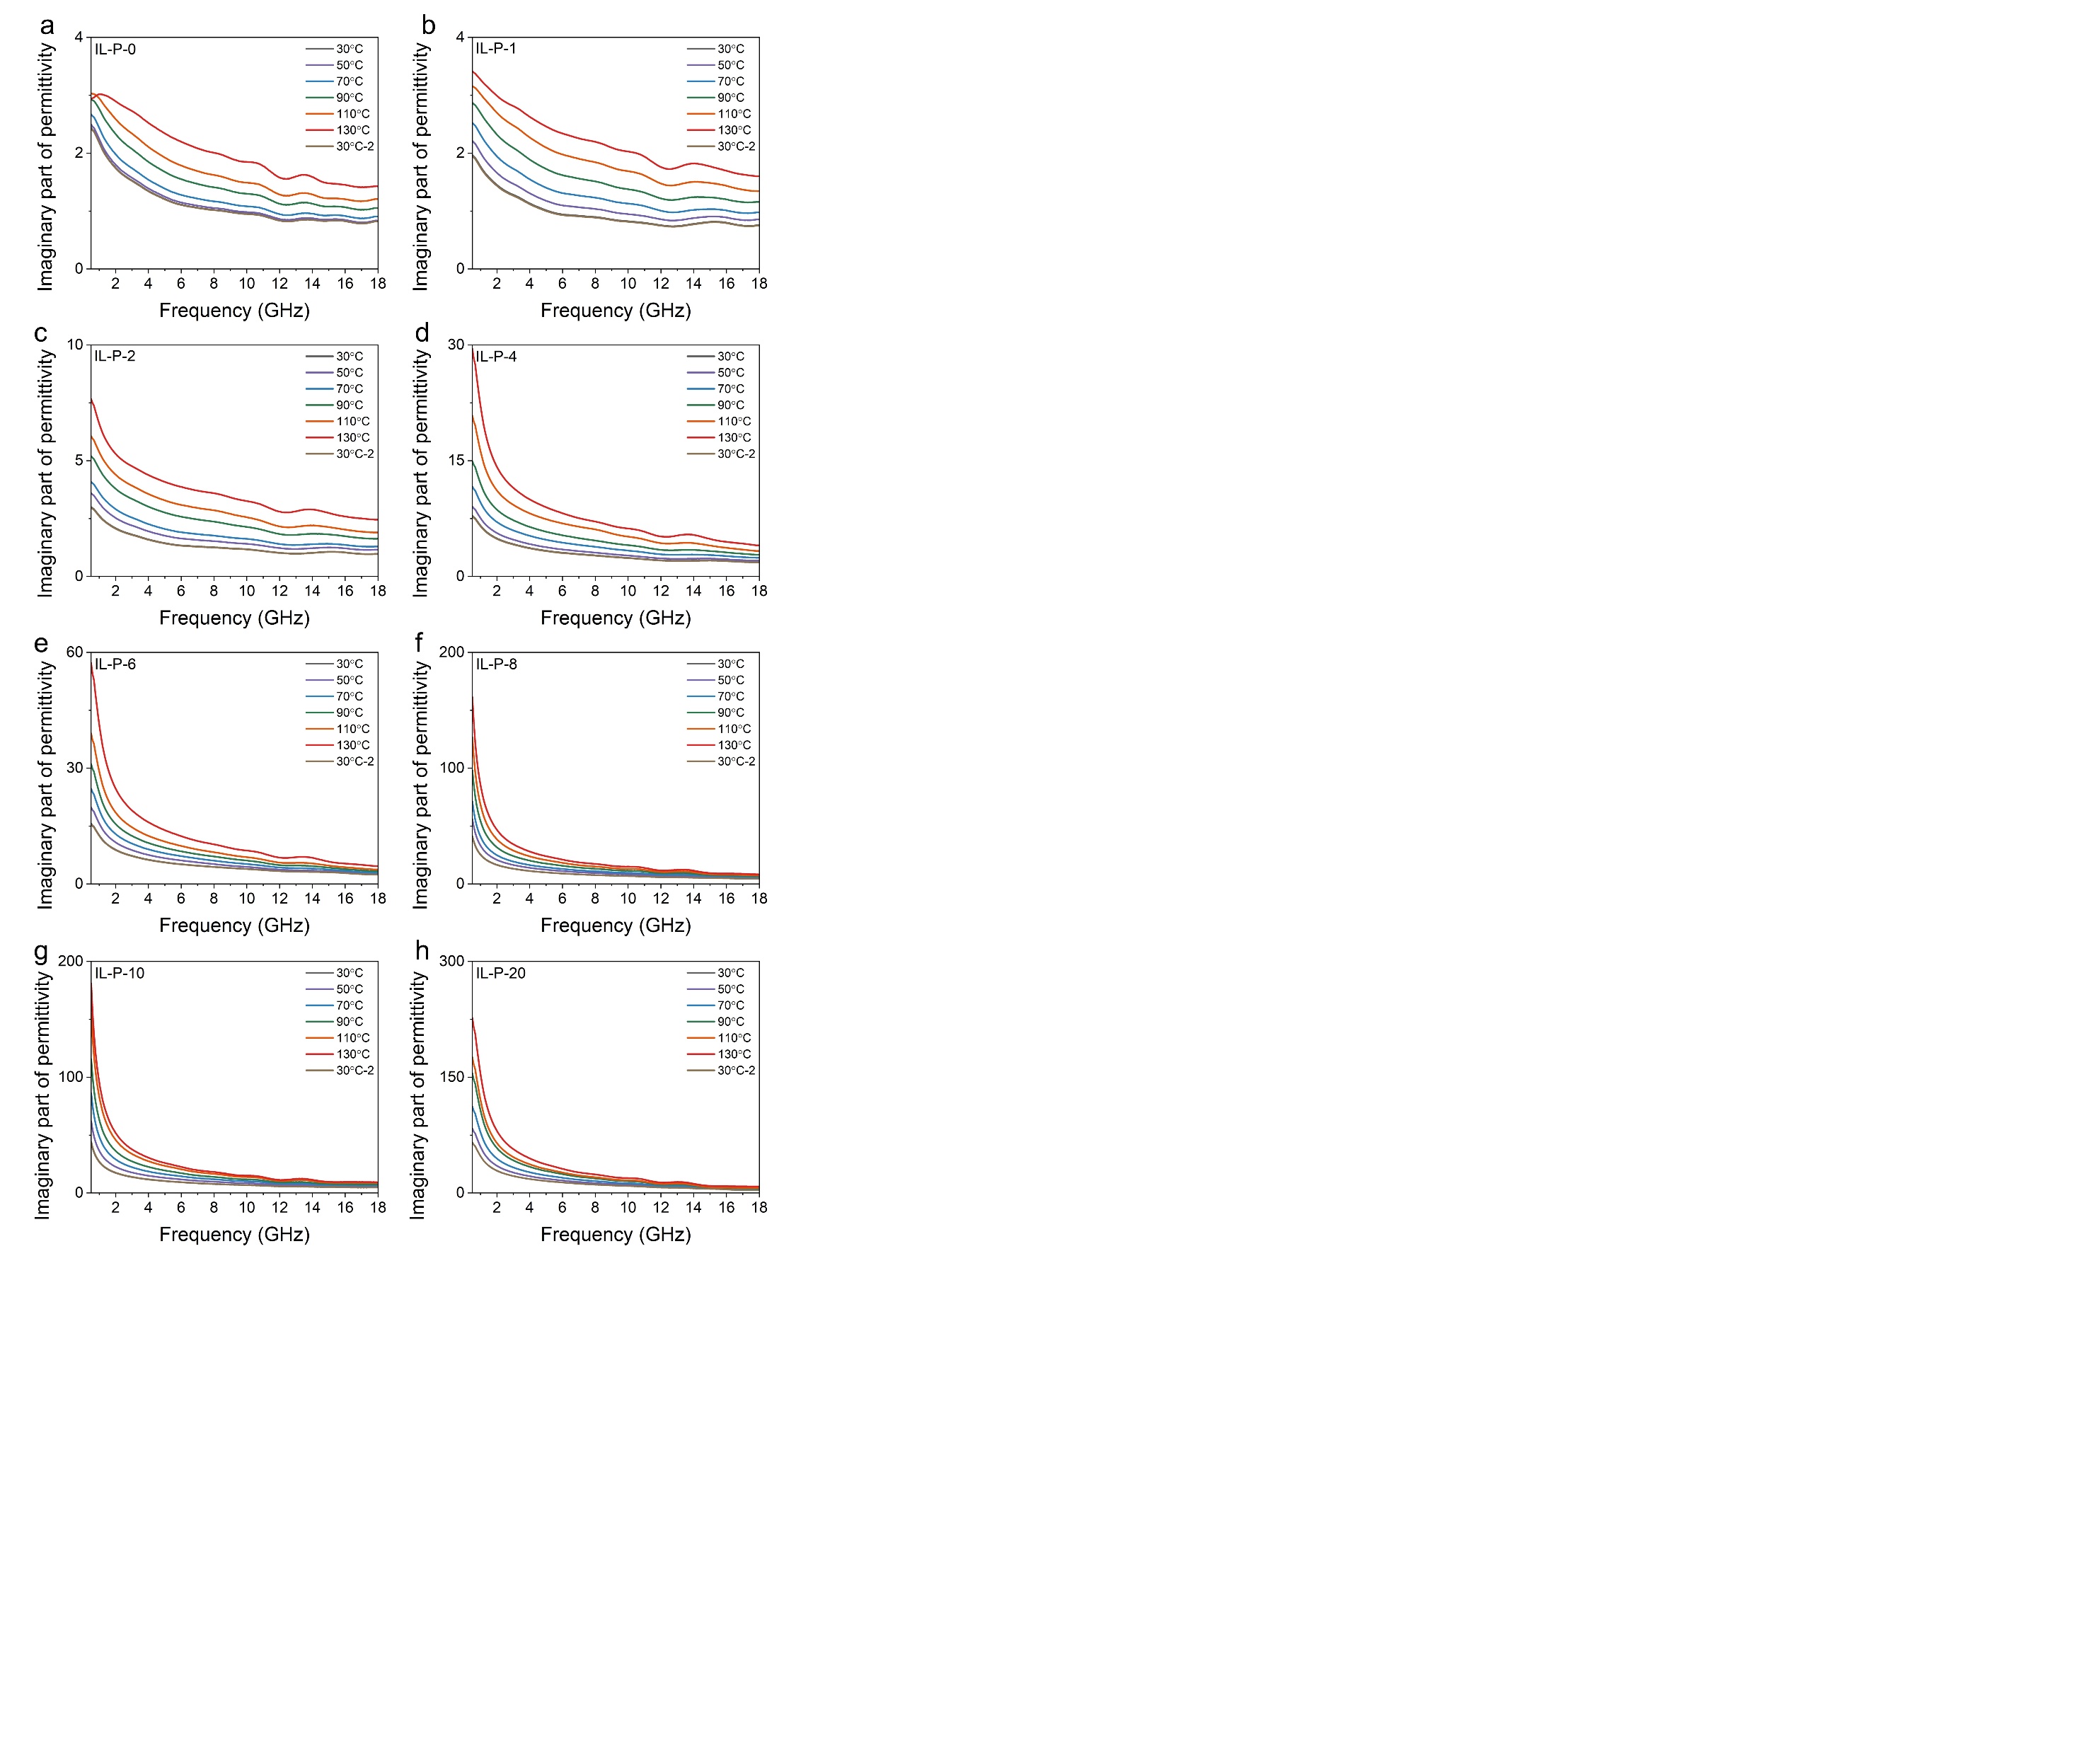


**Supplementary Fig. 7 | Imaginary part of permittivity of IL-P in the 0.5–18 GHz under temperature stimulation. a** IL-P-0. **b** IL-P-1. **c** IL-P-2. **d** IL-P-4. **e** IL-P-6. **f** IL-P-8. **g** IL-P-10. **h** IL-P-20.


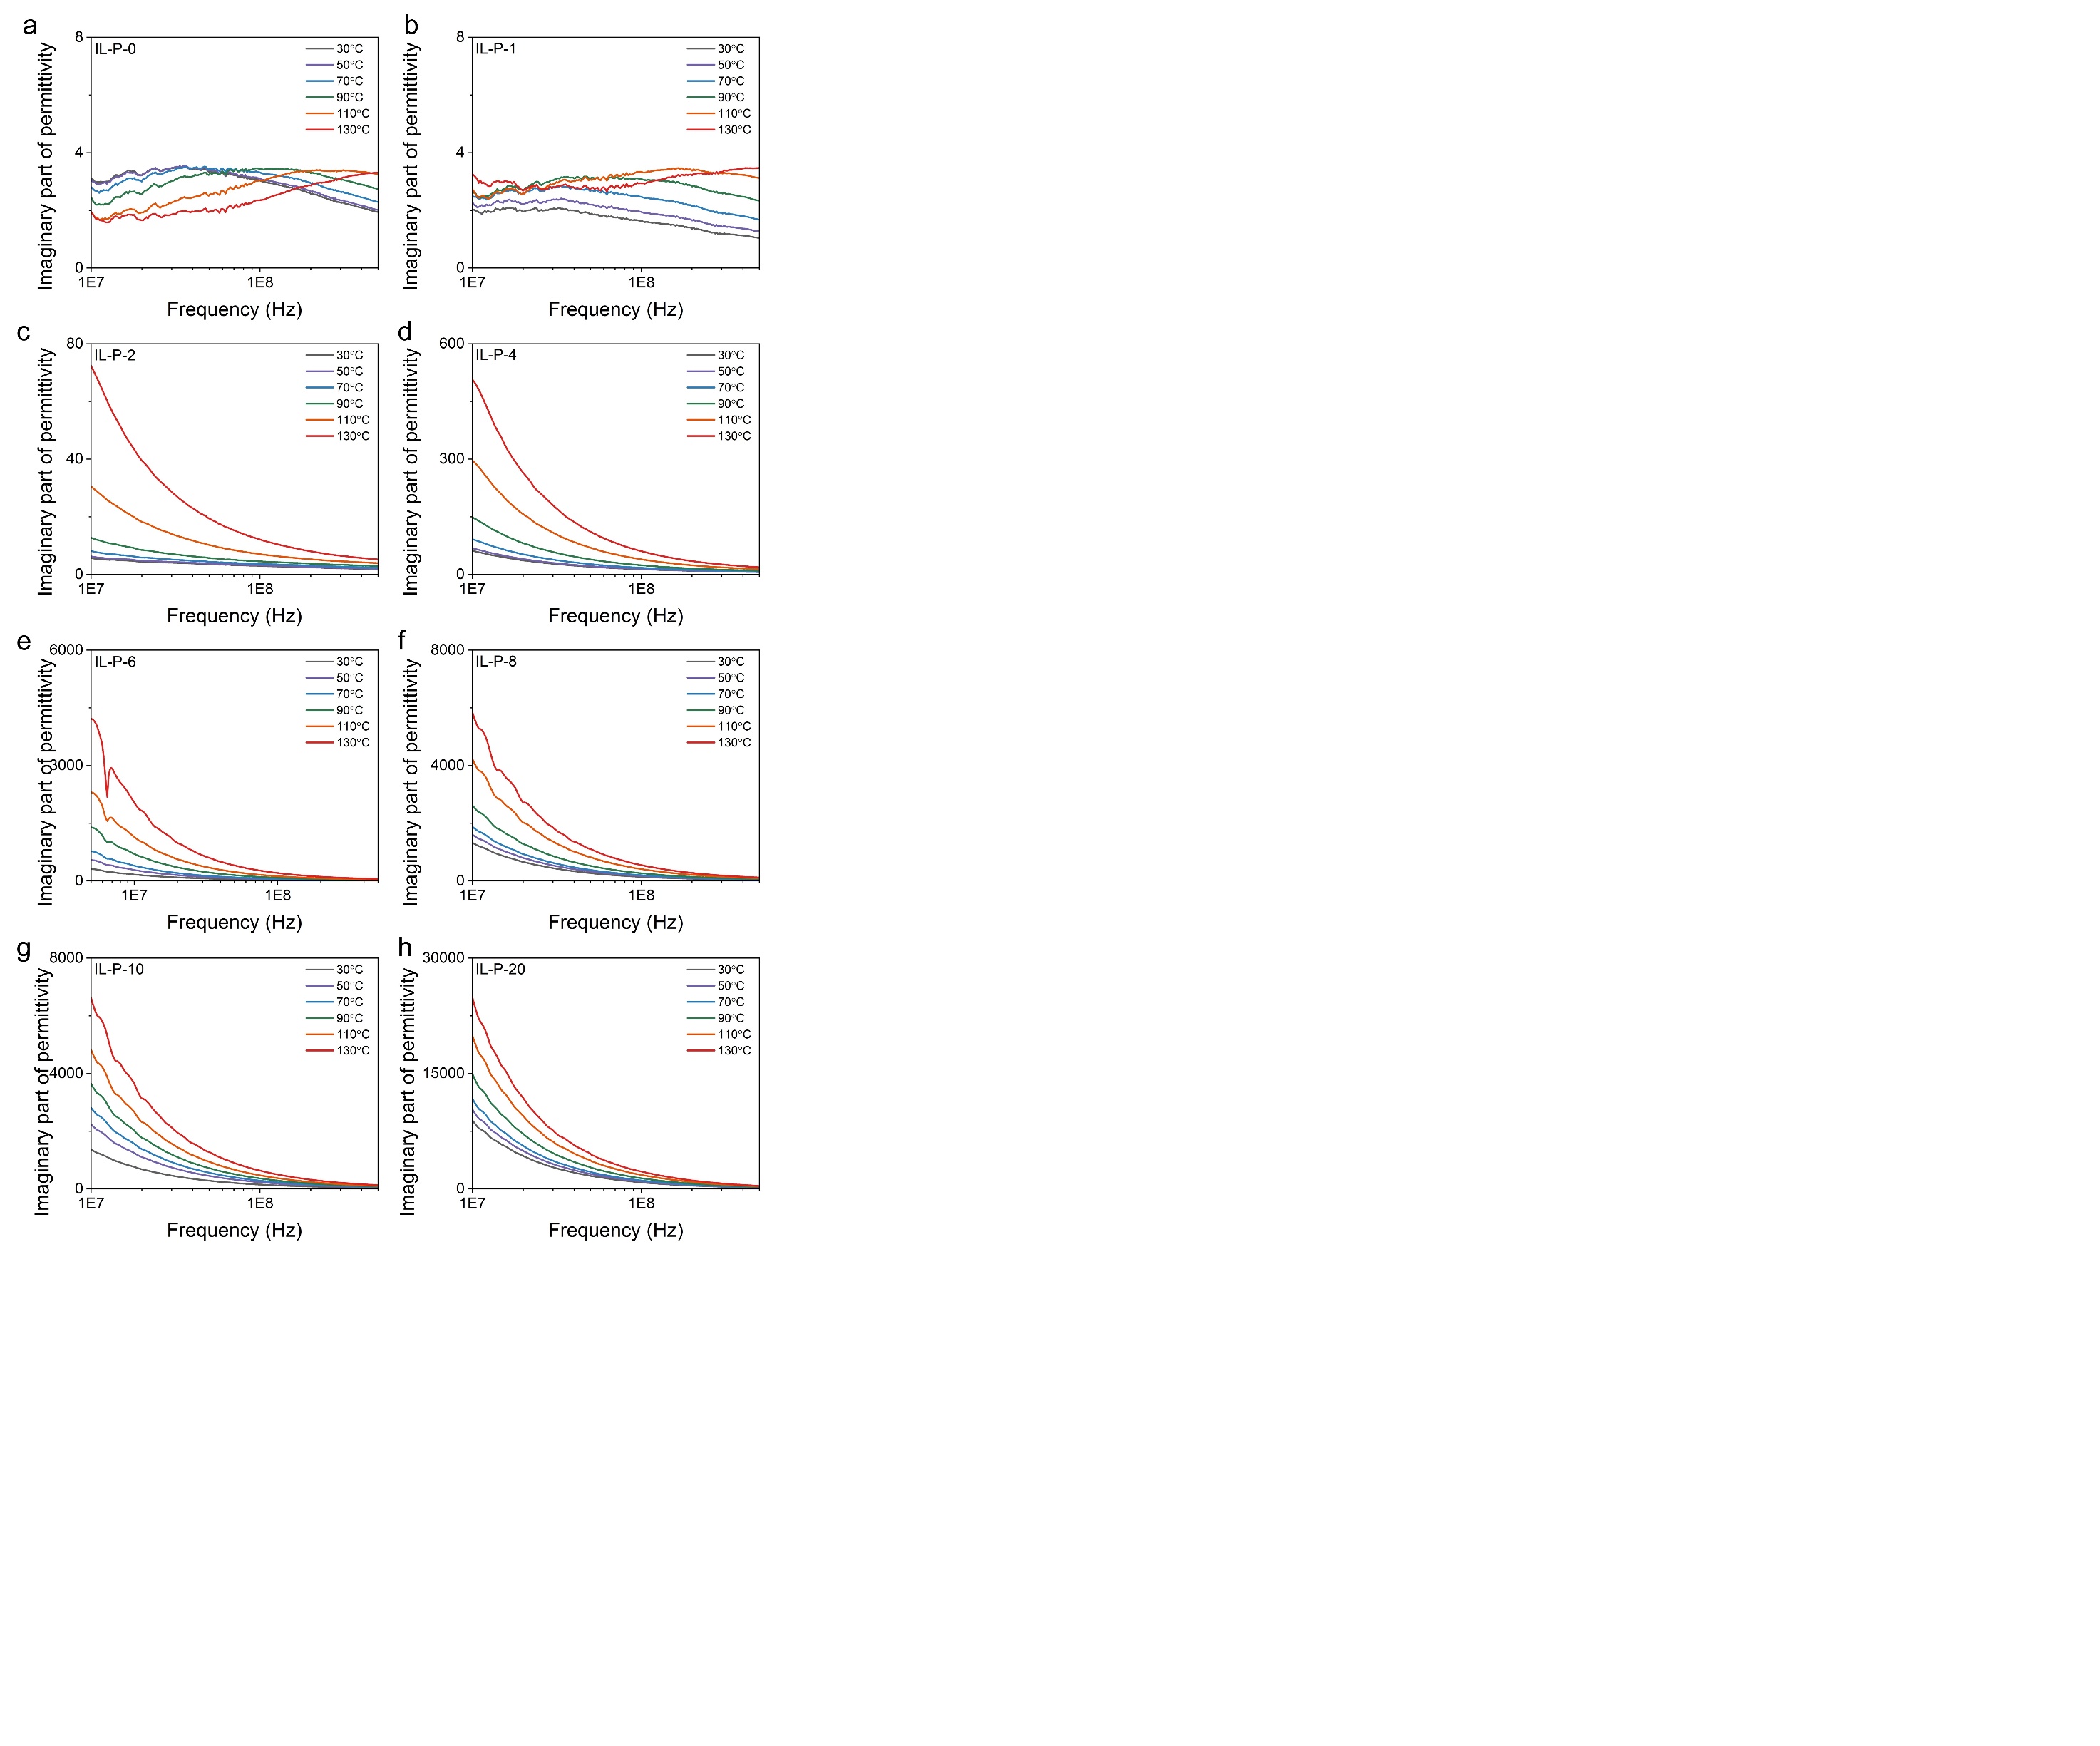


**Supplementary Fig. 8 | Imaginary part of permittivity of IL-P in the 107-5×108 Hz under temperature stimulation. a** IL-P-0. **b** IL-P-1. **c** IL-P-2. **d** IL-P-4. **e** IL-P-6. **f** IL-P-8. **g** IL-P-10. **h** IL-P-20.


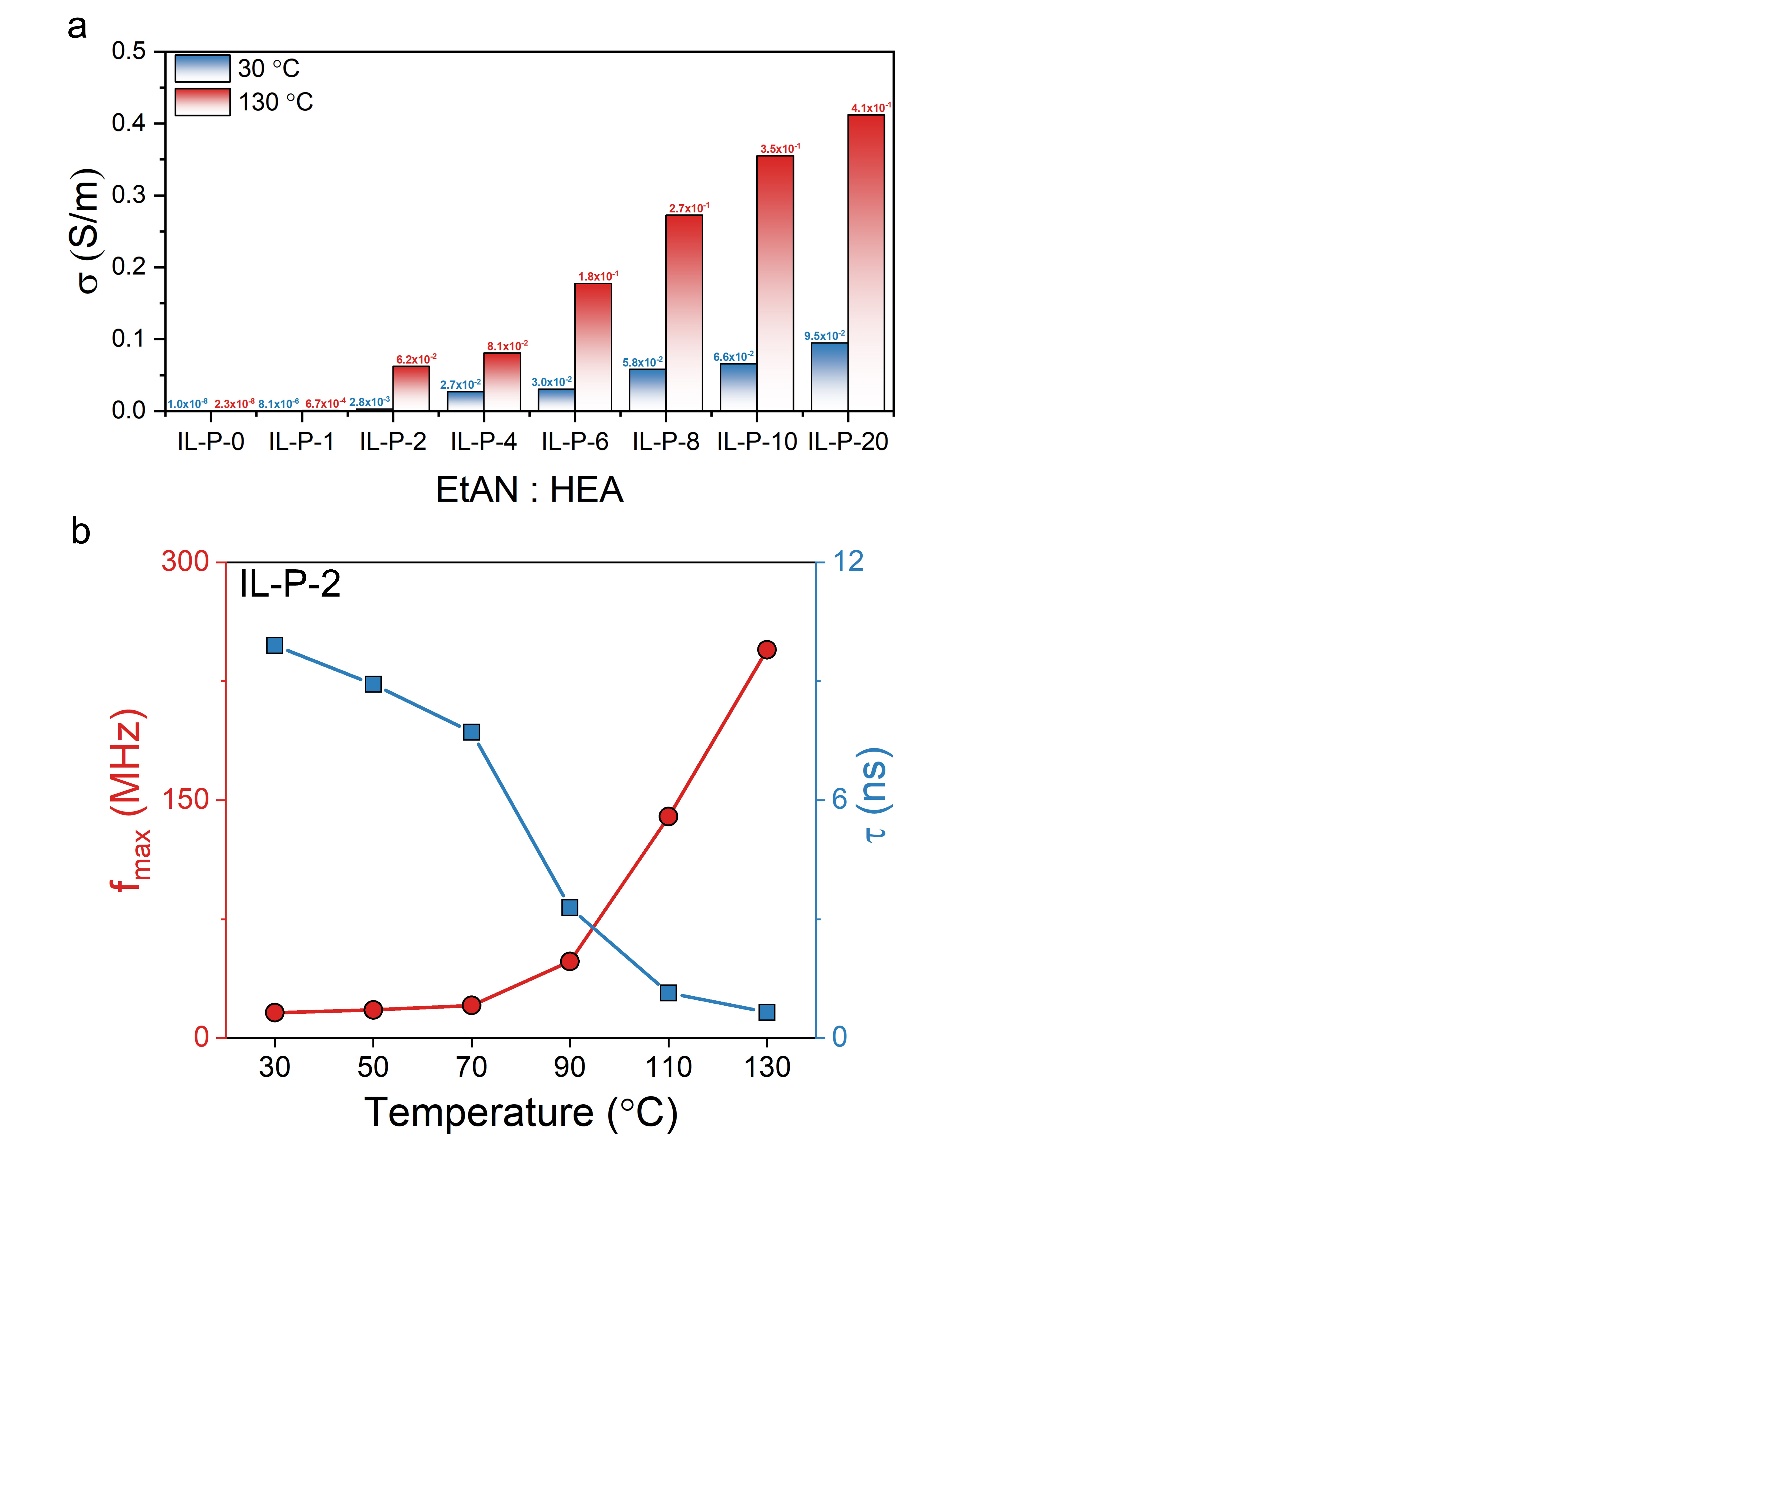


**Supplementary Fig. 9 | Conductivity of IL-P and polarization relaxation of PHEA under temperature stimulation. a** Comparison of the conductivity of IL-P with different concentrations at 30°C and 130°C. **b** Temperature-dependent changes in the polarization relaxation frequency and time of PHEA in the IL-P system.


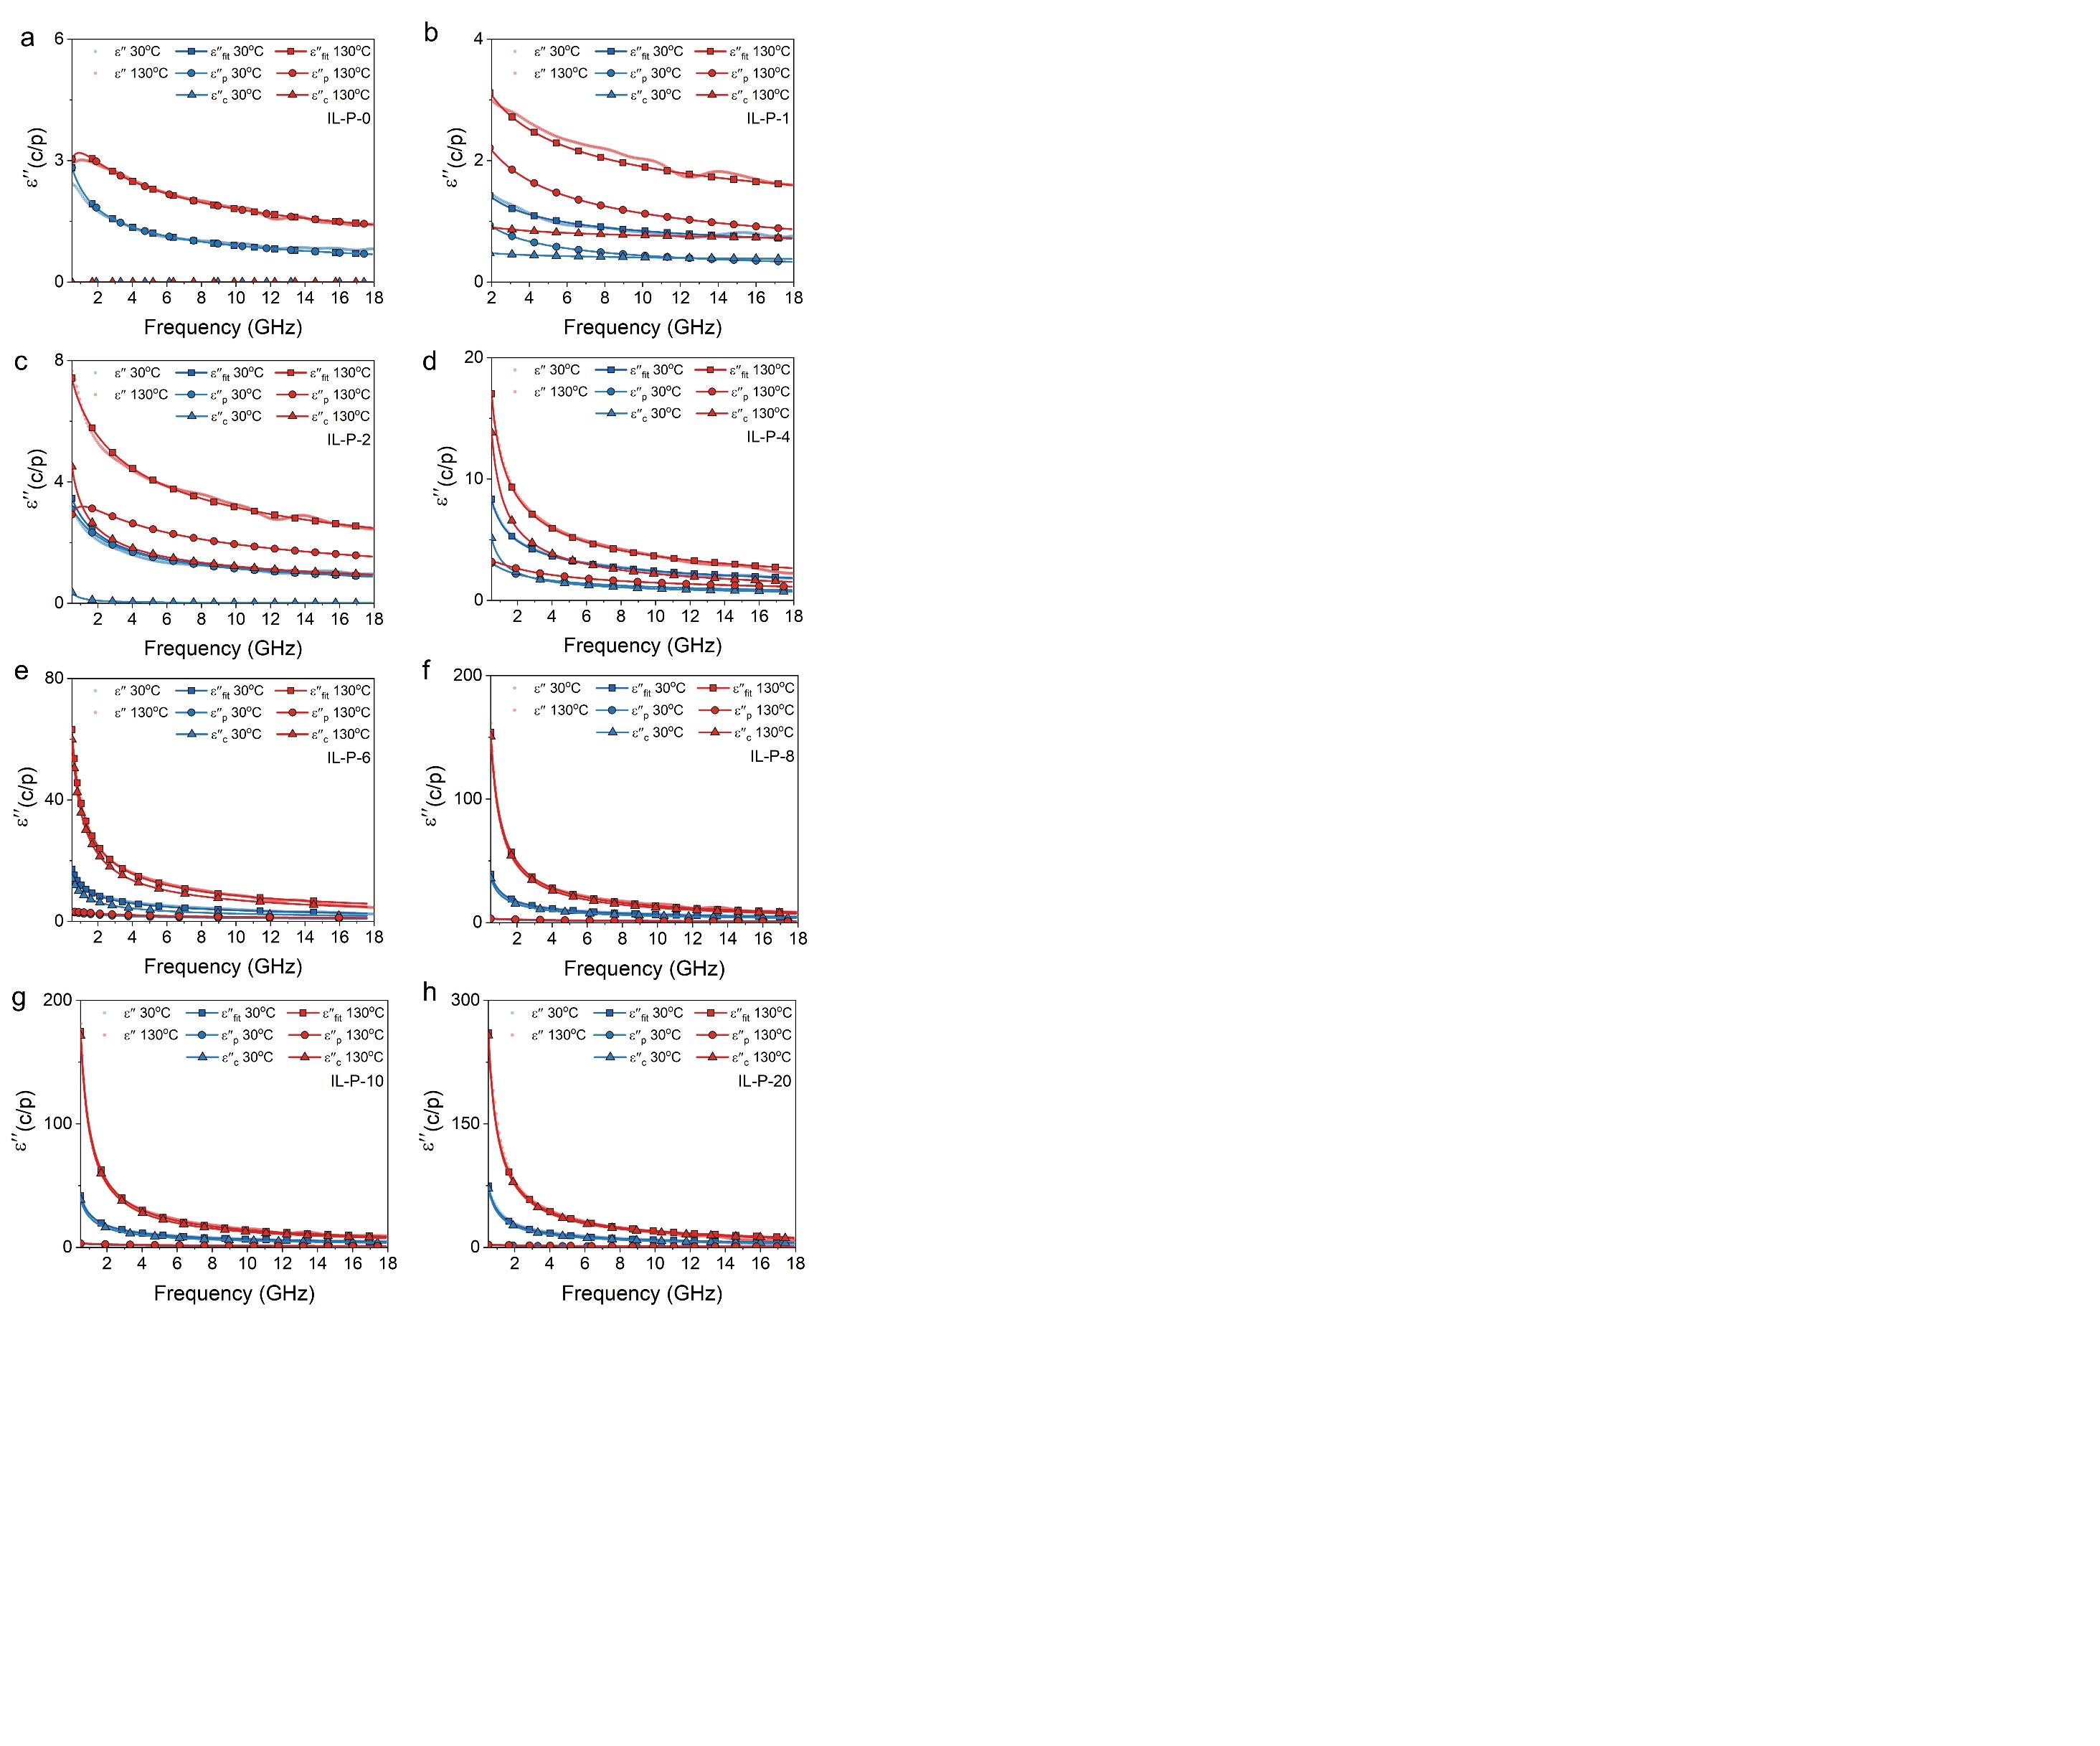


**Supplementary Fig. 10 | ε′′c and ε′′p of IL-P in the 0.5–18 GHz range at 30°C and 130°C fitted using the Havriliak-Negami model. a** IL-P-0. **b** IL-P-1. **c** IL-P-2. **d** IL-P-4. **e** IL-P-6. **f** IL-P-8. **g** IL-P-10. **h** IL-P-20.


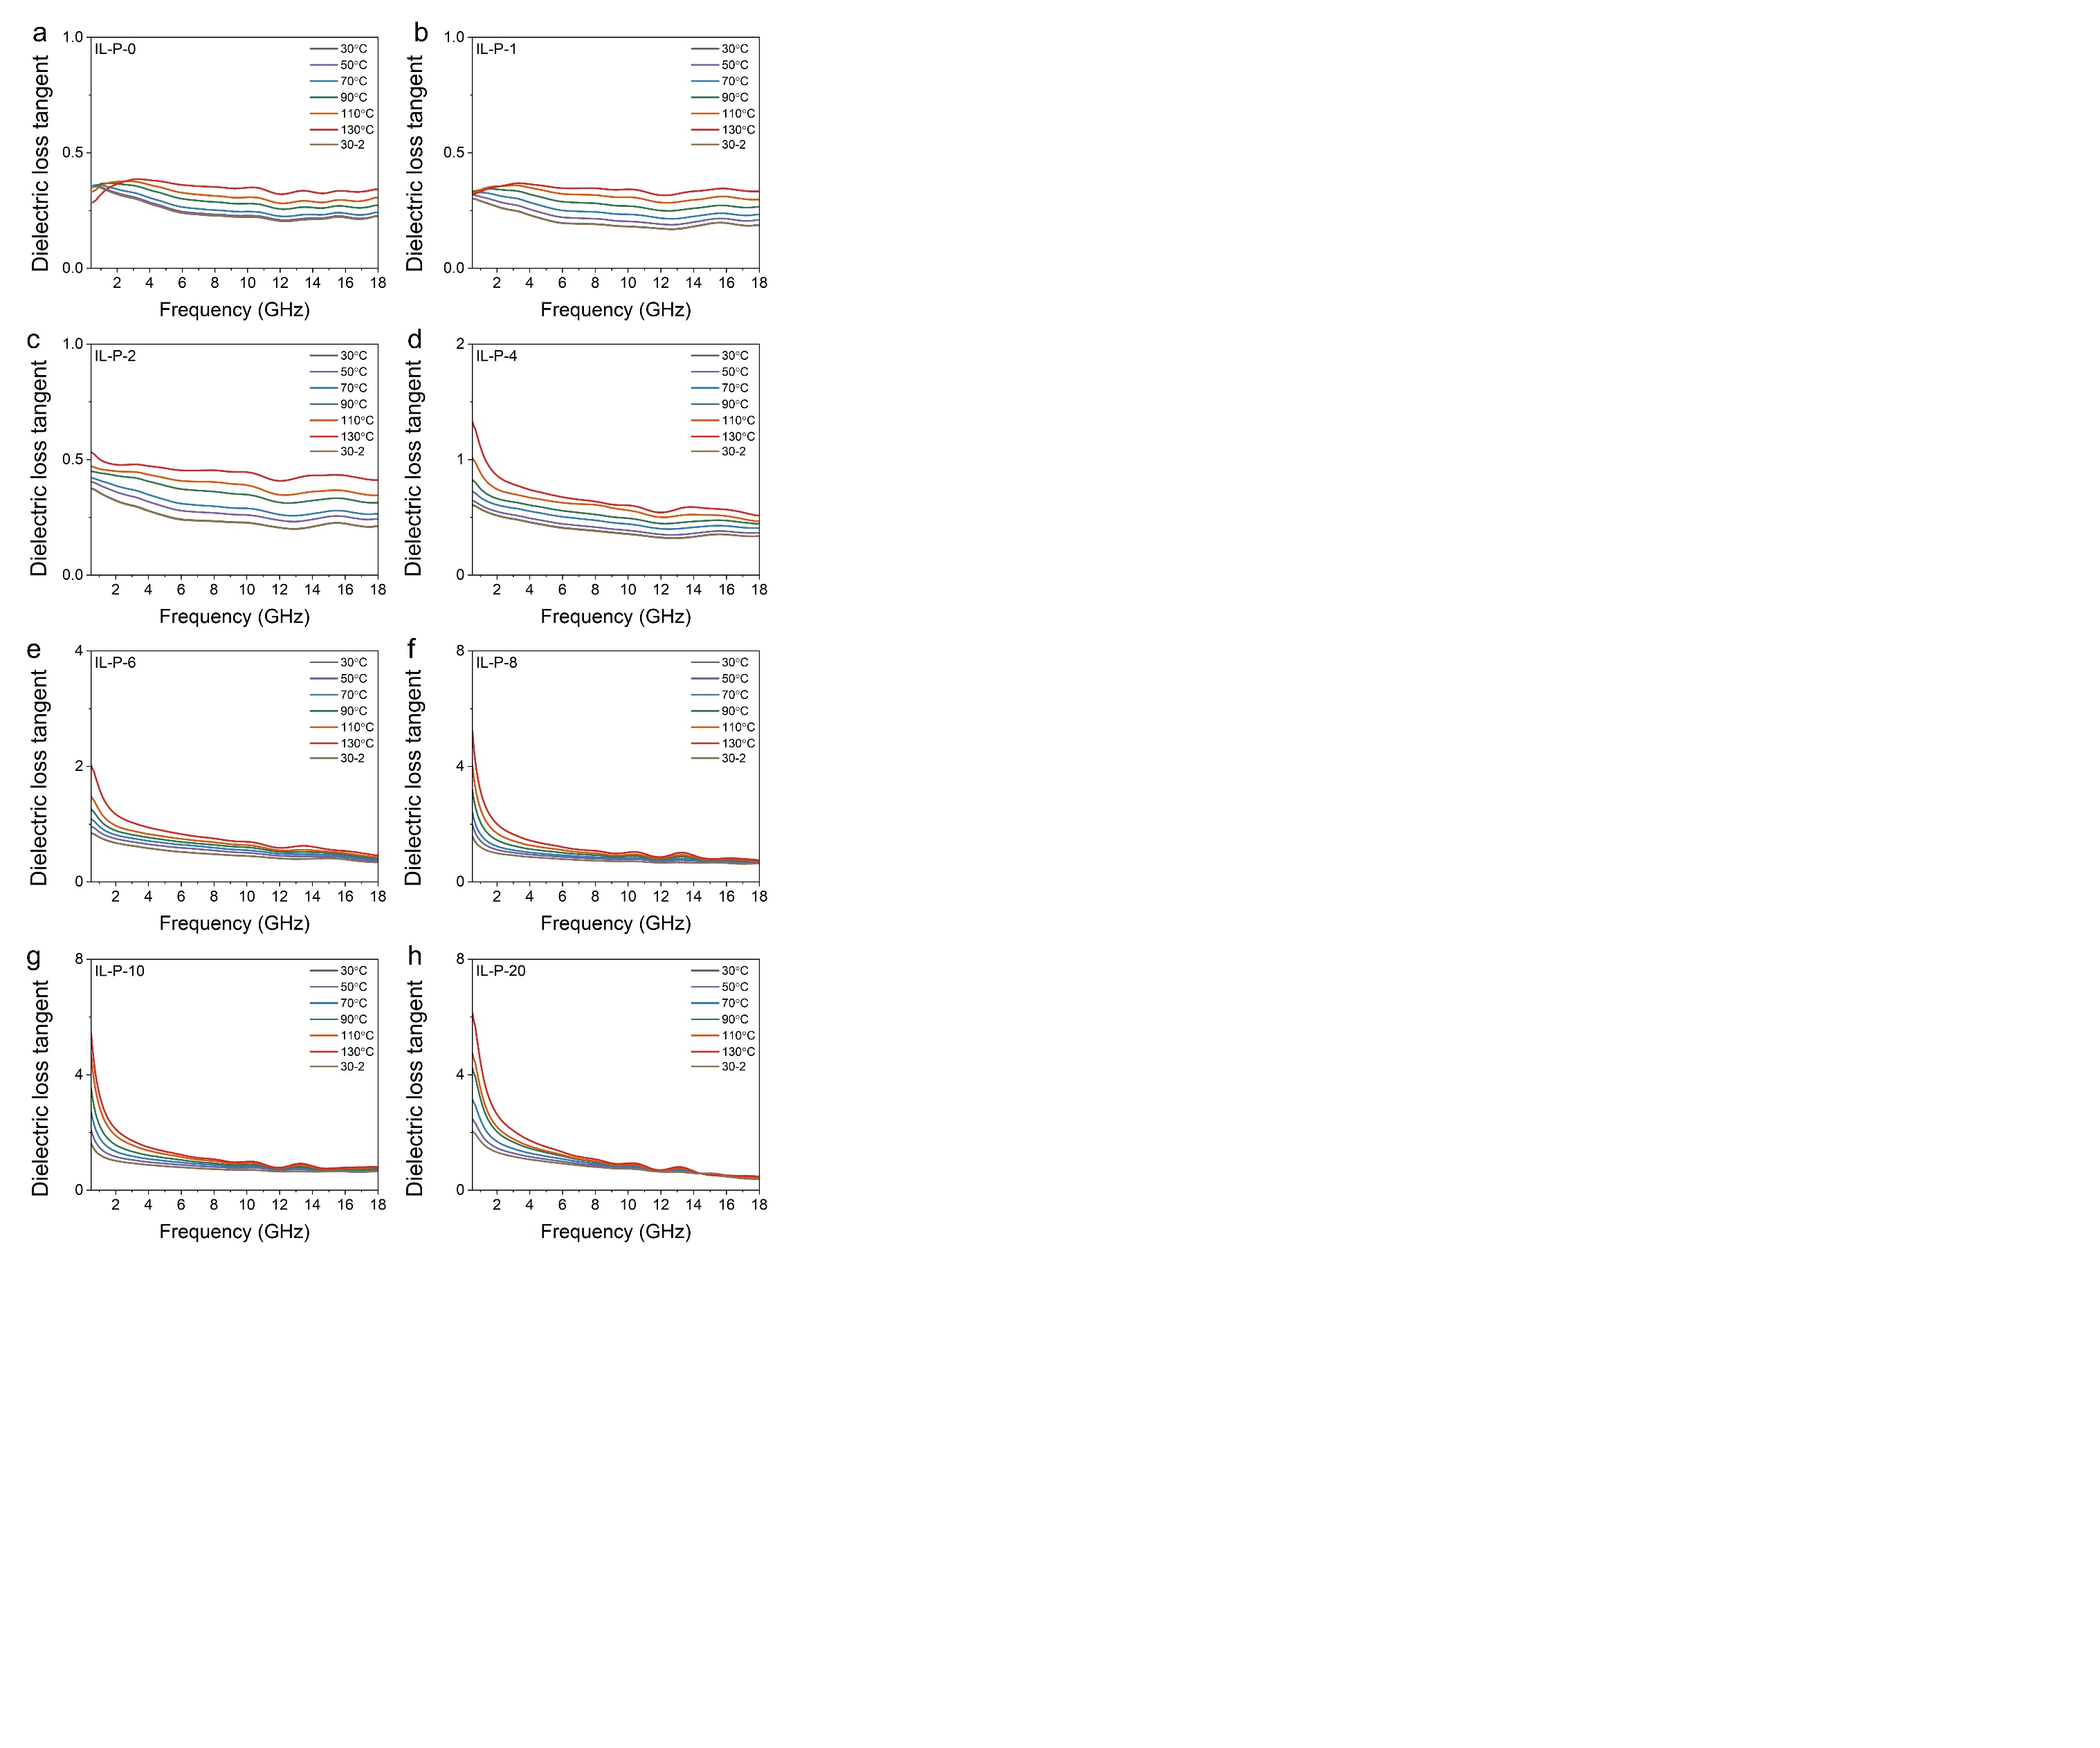


**Supplementary Fig. 11 | Dielectric loss tangent of IL-P in the 0.5–18 GHz under temperature stimulation. a** IL-P-0. **b** IL-P-1. **c** IL-P-2. **d** IL-P-4. **e** IL-P-6. **f** IL-P-8. **g** IL-P-10. **h** IL-P-20.


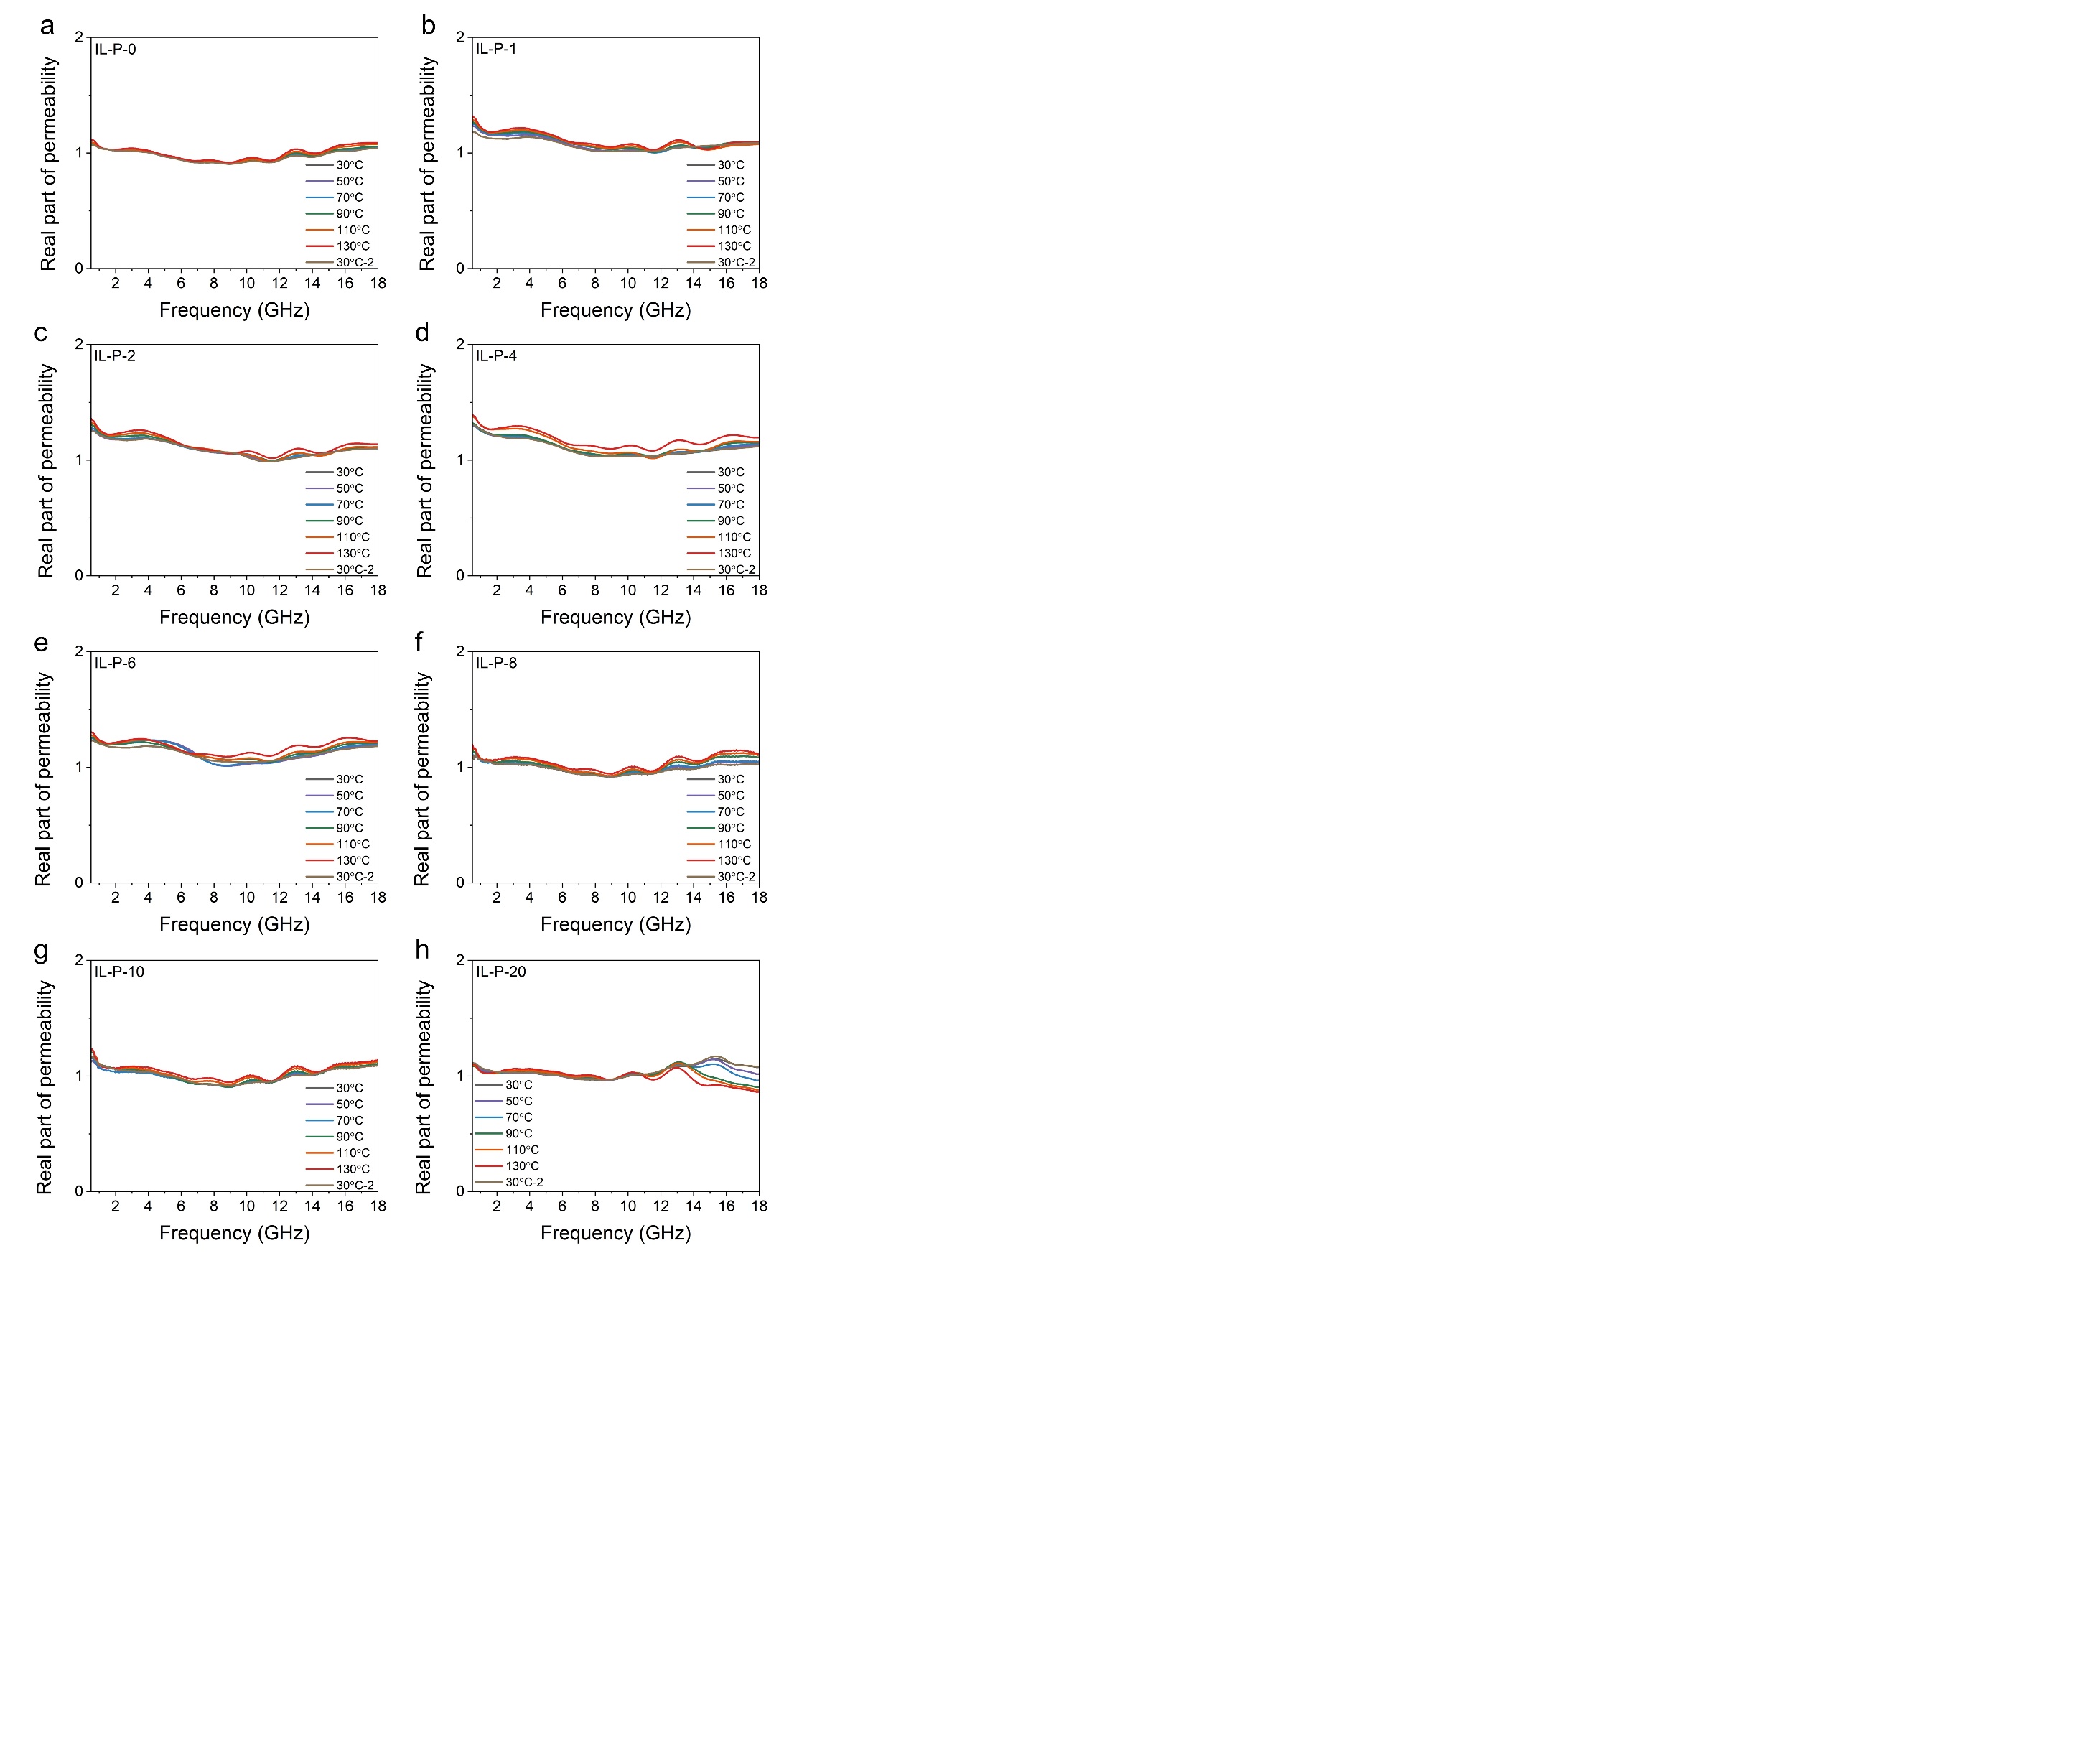


**Supplementary Fig. 12 | Real part of permeability of IL-P in the 0.5–18 GHz under temperature stimulation. a** IL-P-0. **b** IL-P-1. **c** IL-P-2. **d** IL-P-4. **e** IL-P-6. **f** IL-P-8. **g** IL-P-10. **h** IL-P-20.


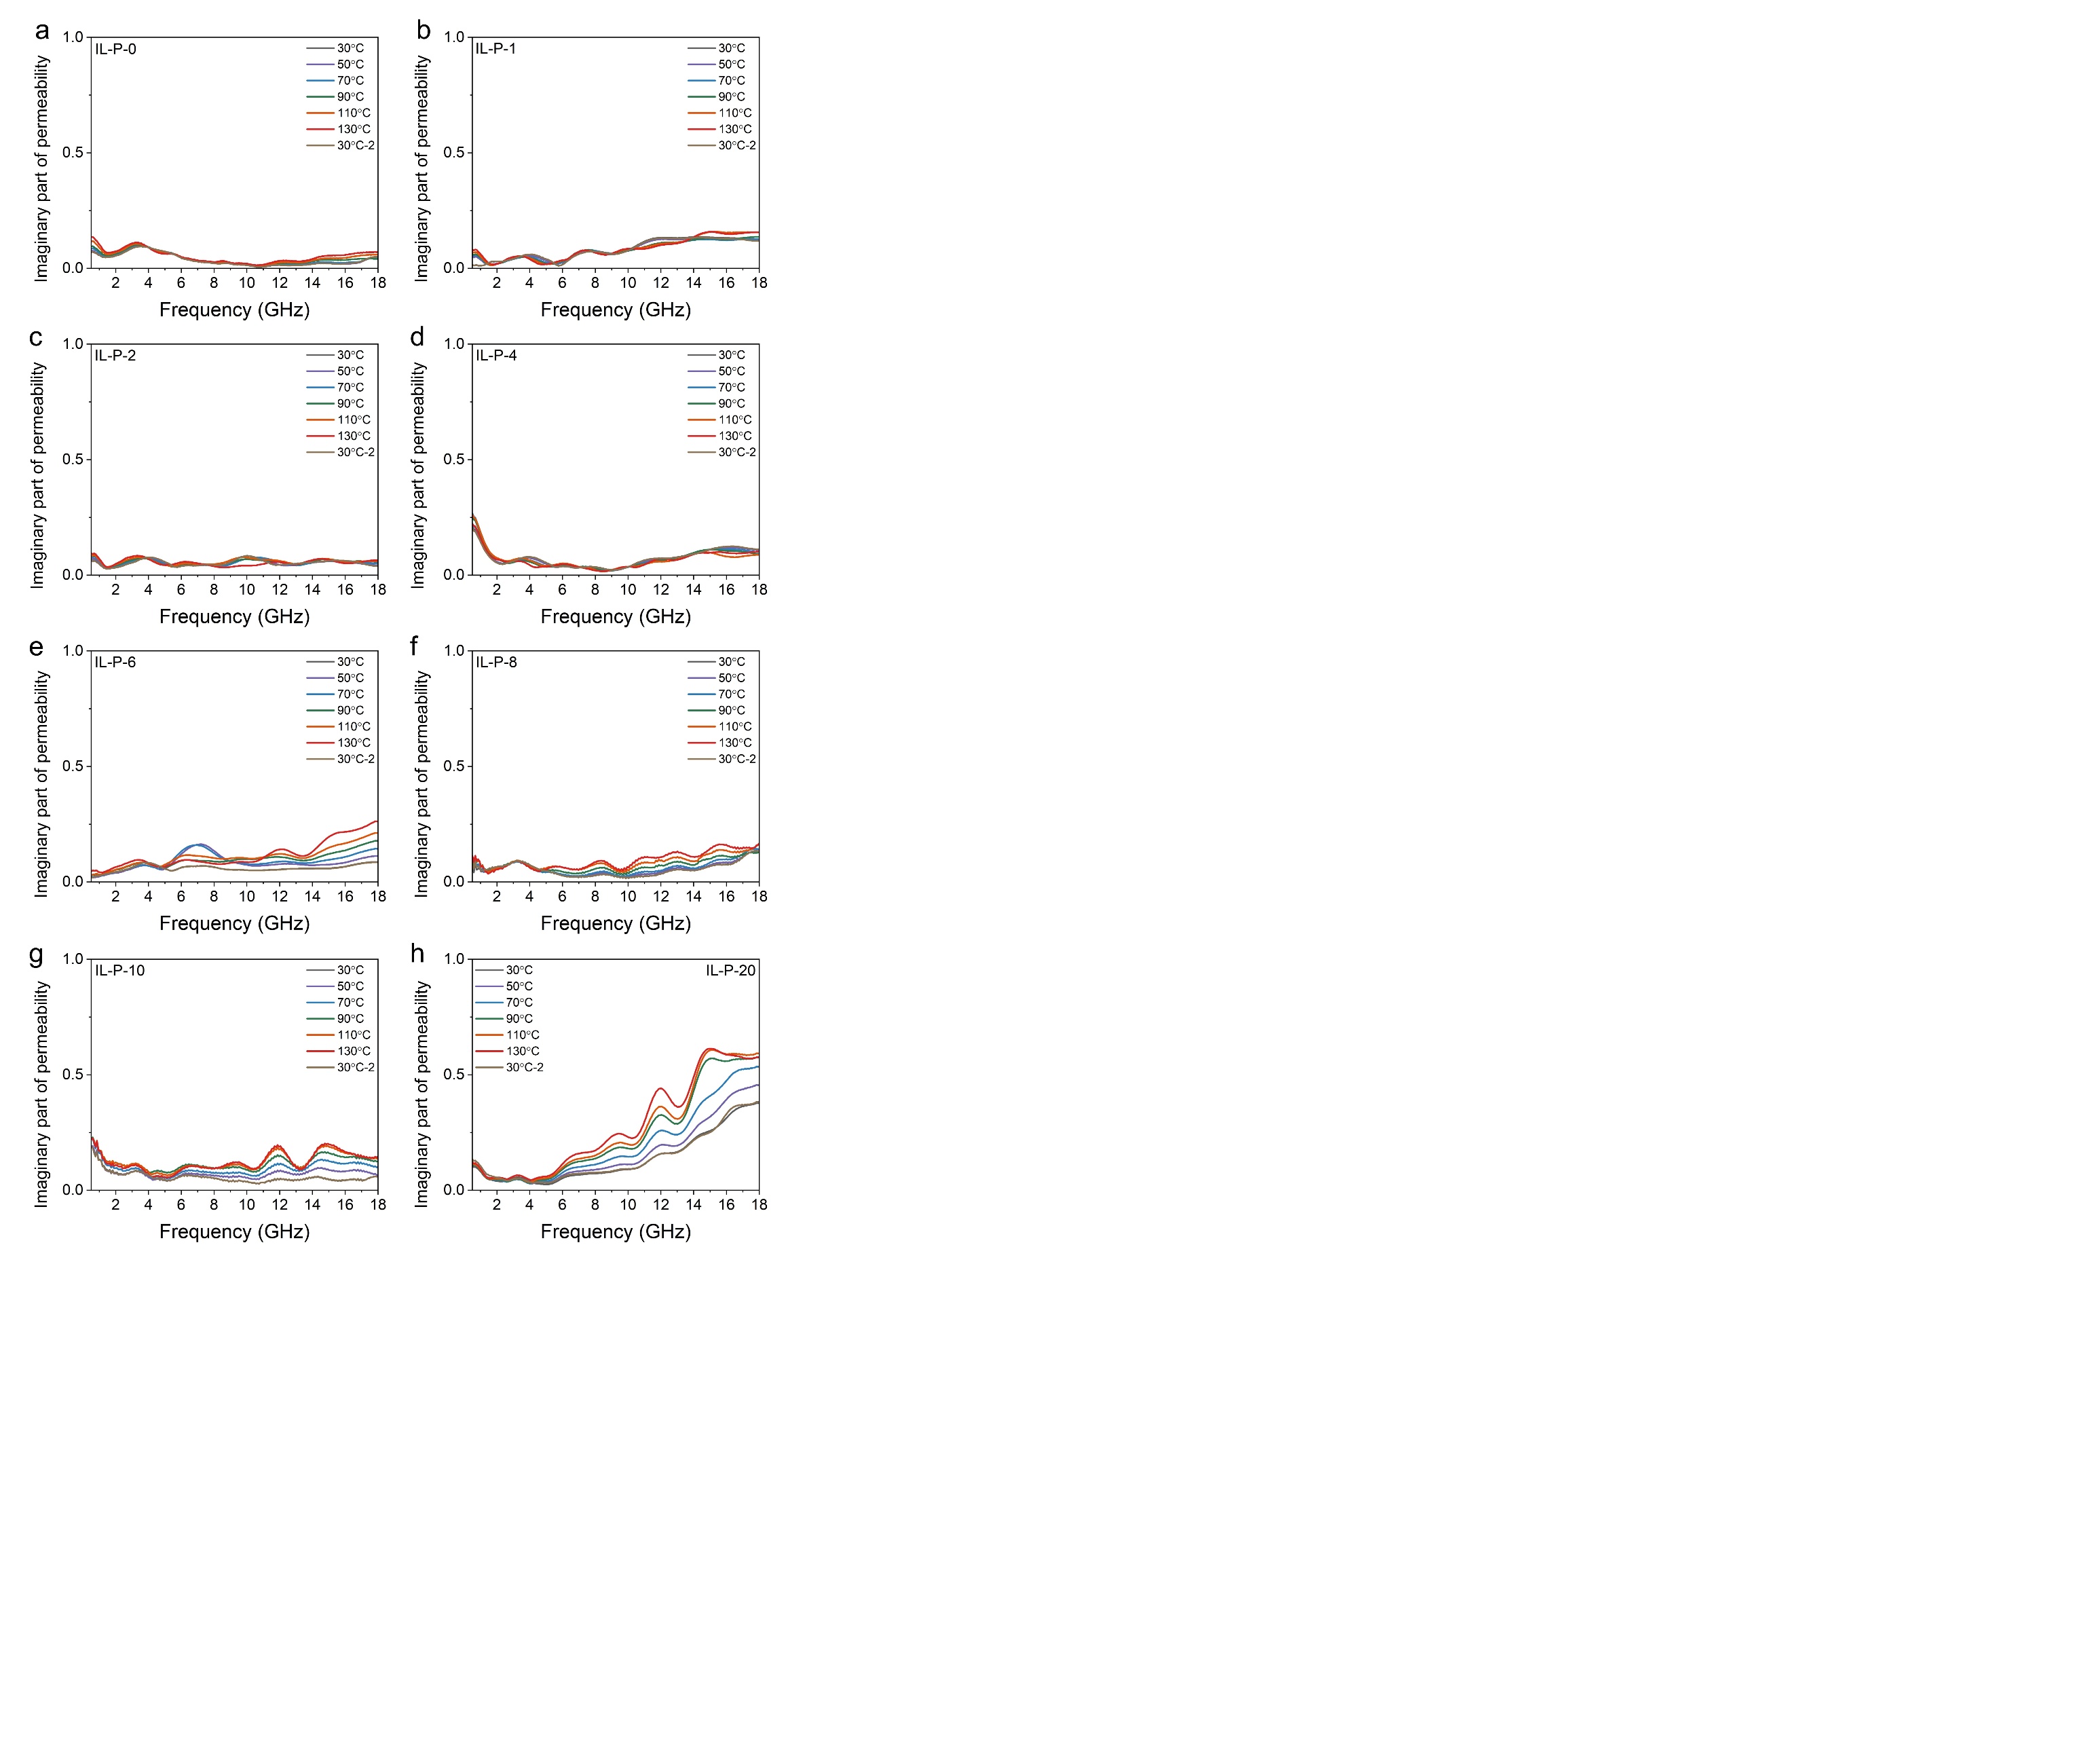


**Supplementary Fig. 13 | Imaginary part of permeability of IL-P in the 0.5–18 GHz under temperature stimulation. a** IL-P-0. **b** IL-P-1. **c** IL-P-2. **d** IL-P-4. **e** IL-P-6. **f** IL-P-8. **g** IL-P-10. **h** IL-P-20.


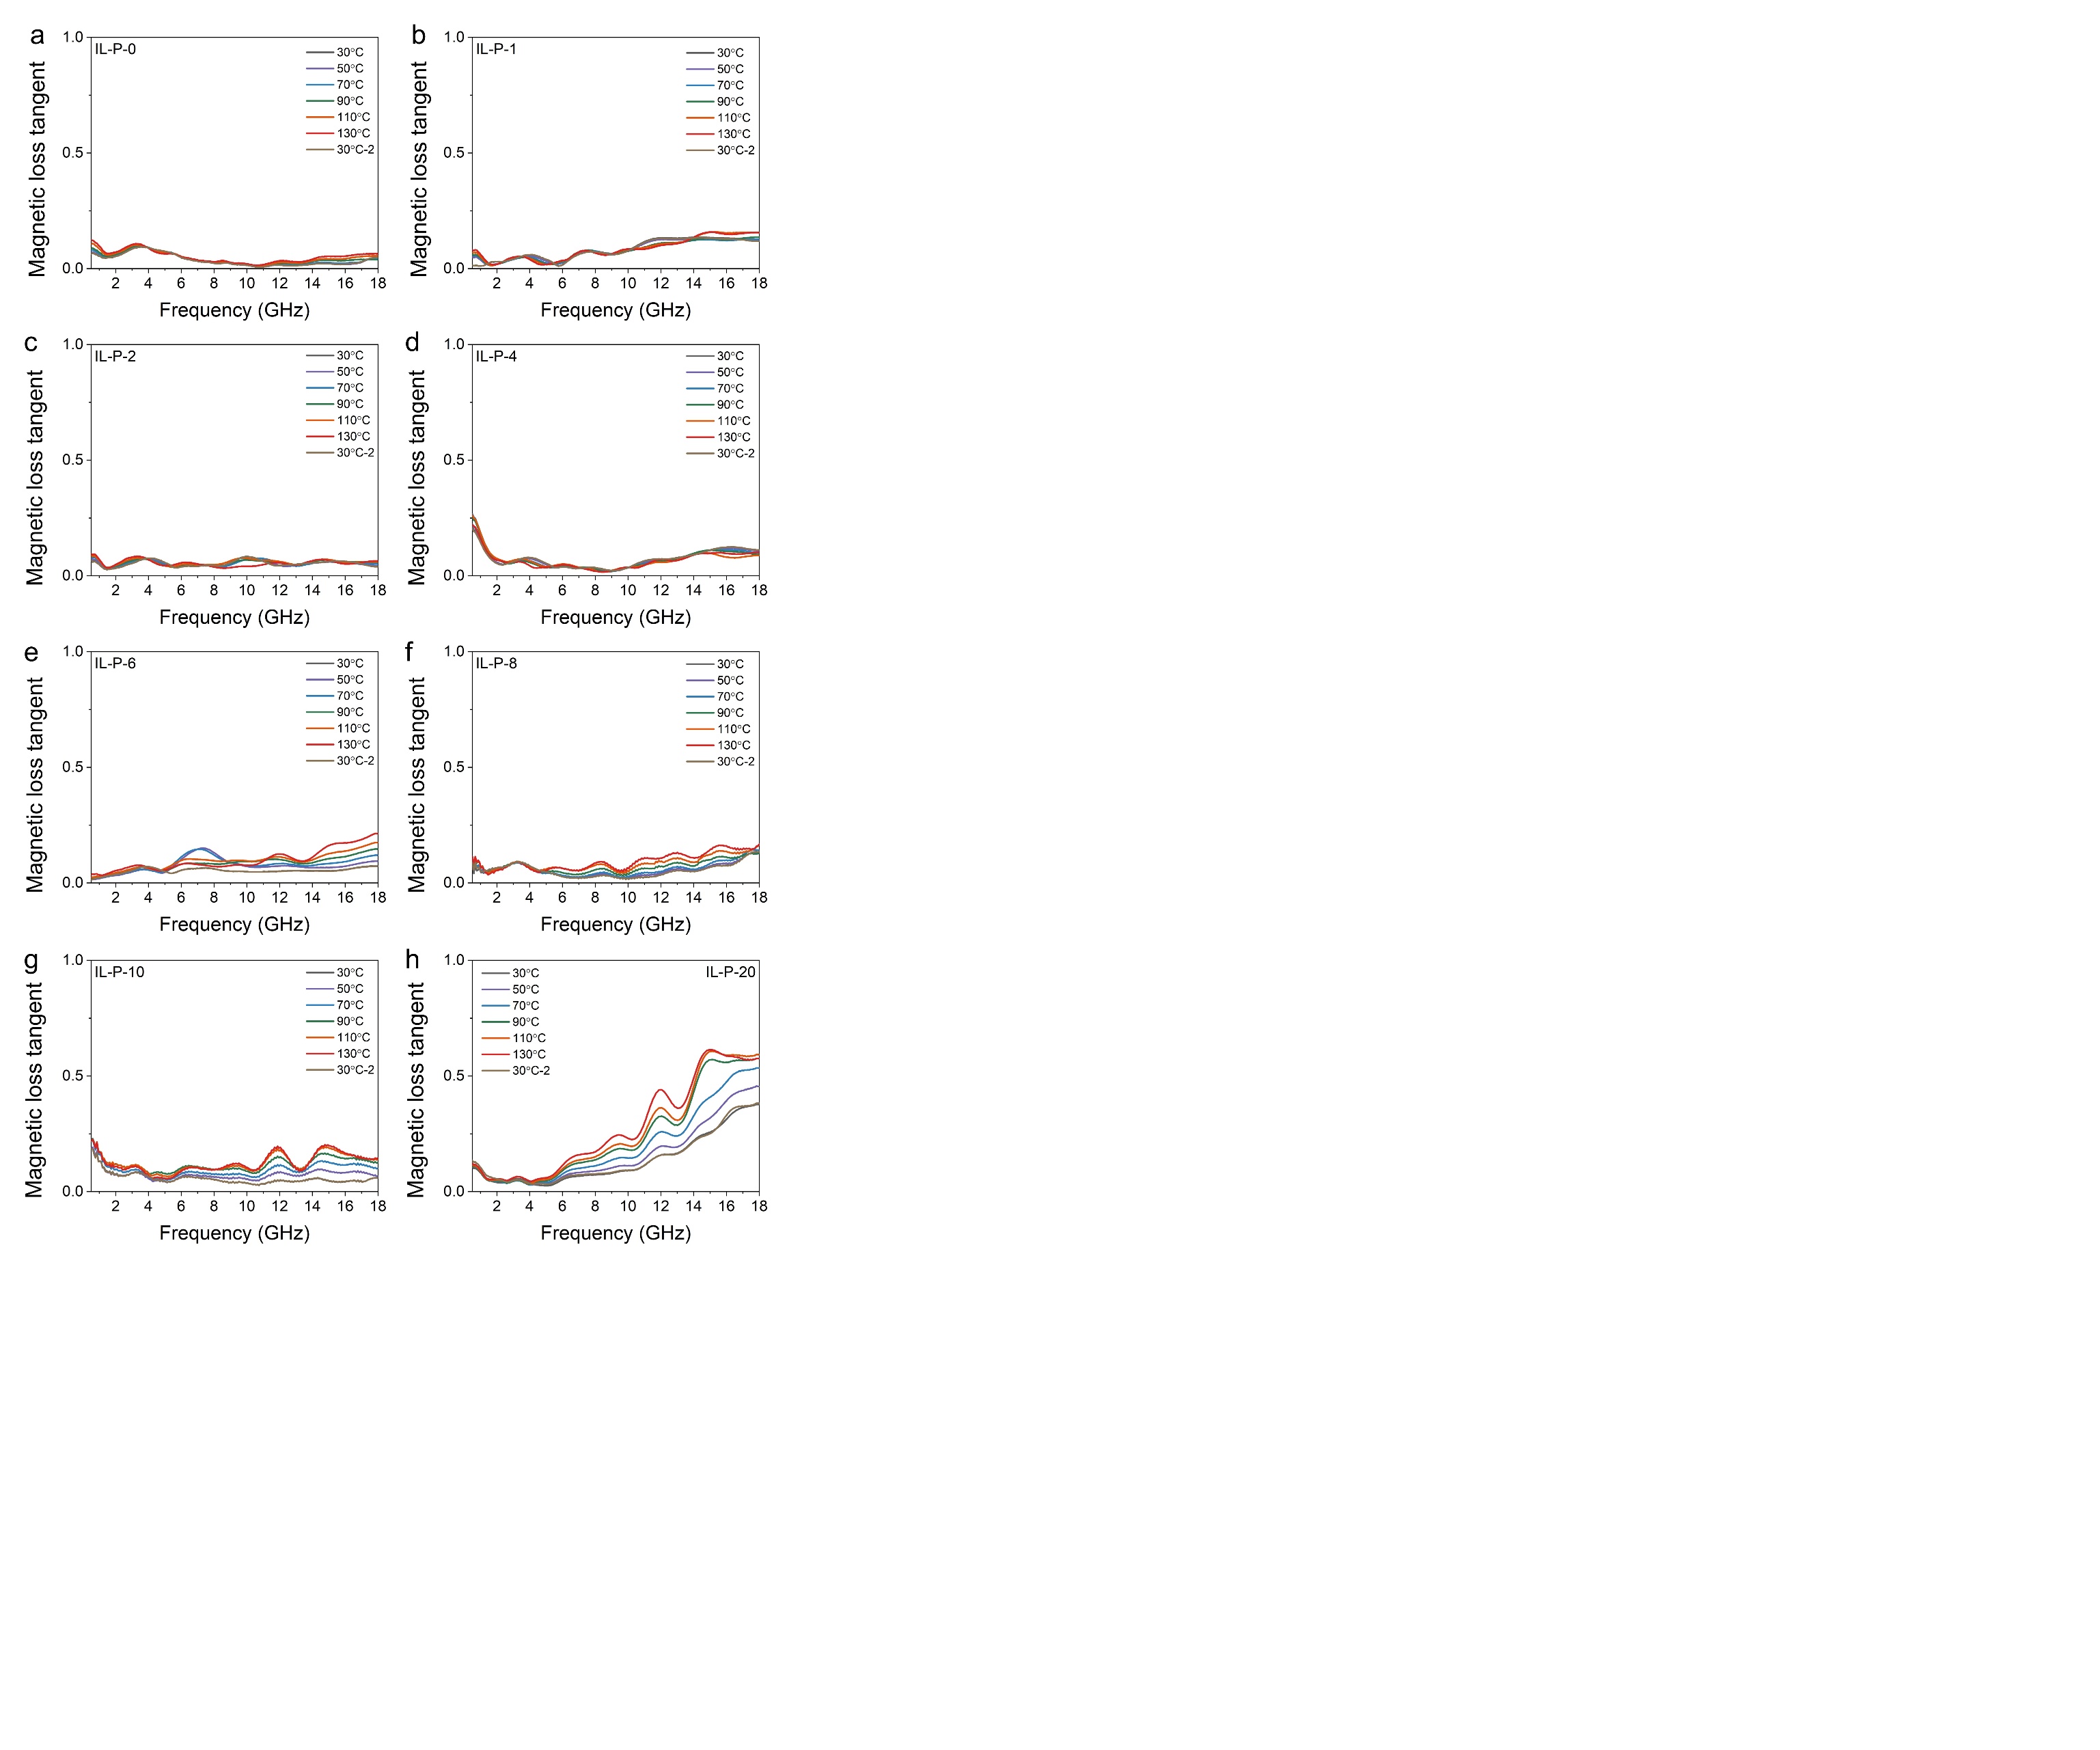


**Supplementary Fig. 14 | Magnetic loss tangent of IL-P in the 0.5–18 GHz under temperature stimulation. a** IL-P-0. **b** IL-P-1. **c** IL-P-2. **d** IL-P-4. **e** IL-P-6. **f** IL-P-8. **g** IL-P-10. **h** IL-P-20.

**
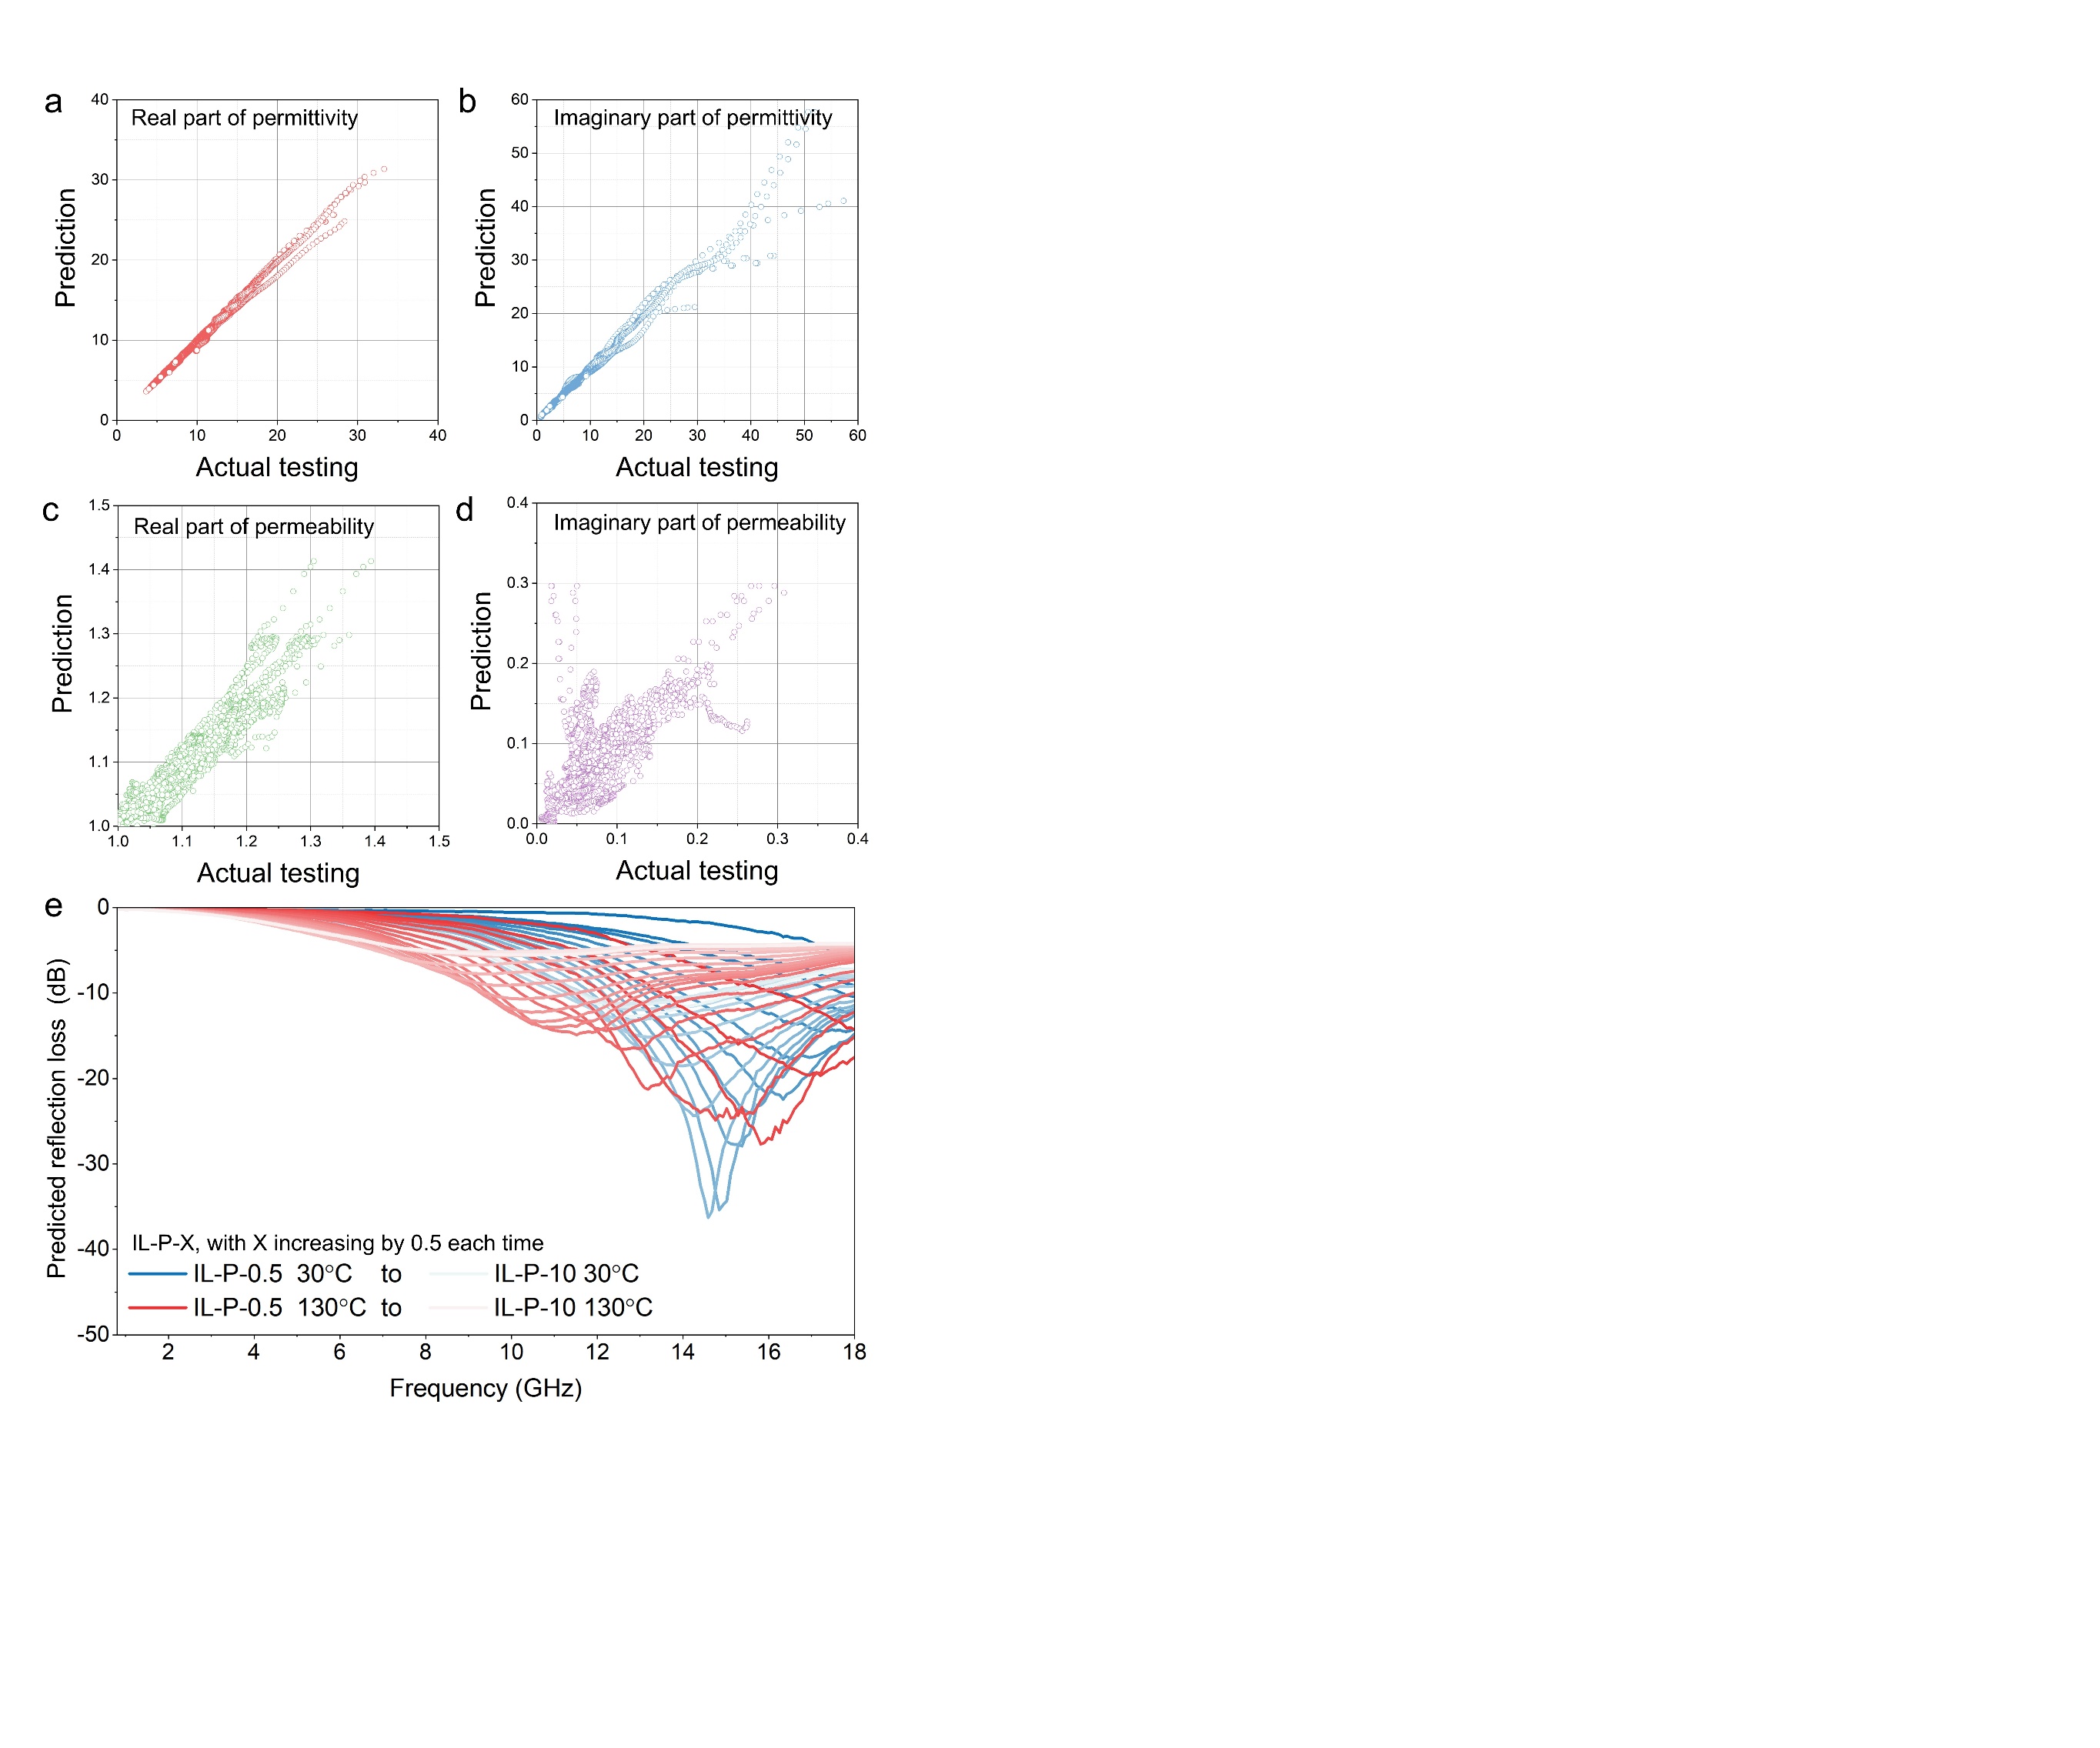
**

**Supplementary Fig. 15 | Machine learning-based prediction results of electromagnetic parameters and reflection loss from 0.5 GHz to 18 GHz.** **a** Real part of permittivity. **b** Imaginary part of permittivity. **c** Real part of the permeability. **d** Imaginary part of the permeability. **e** Reflection loss.

**
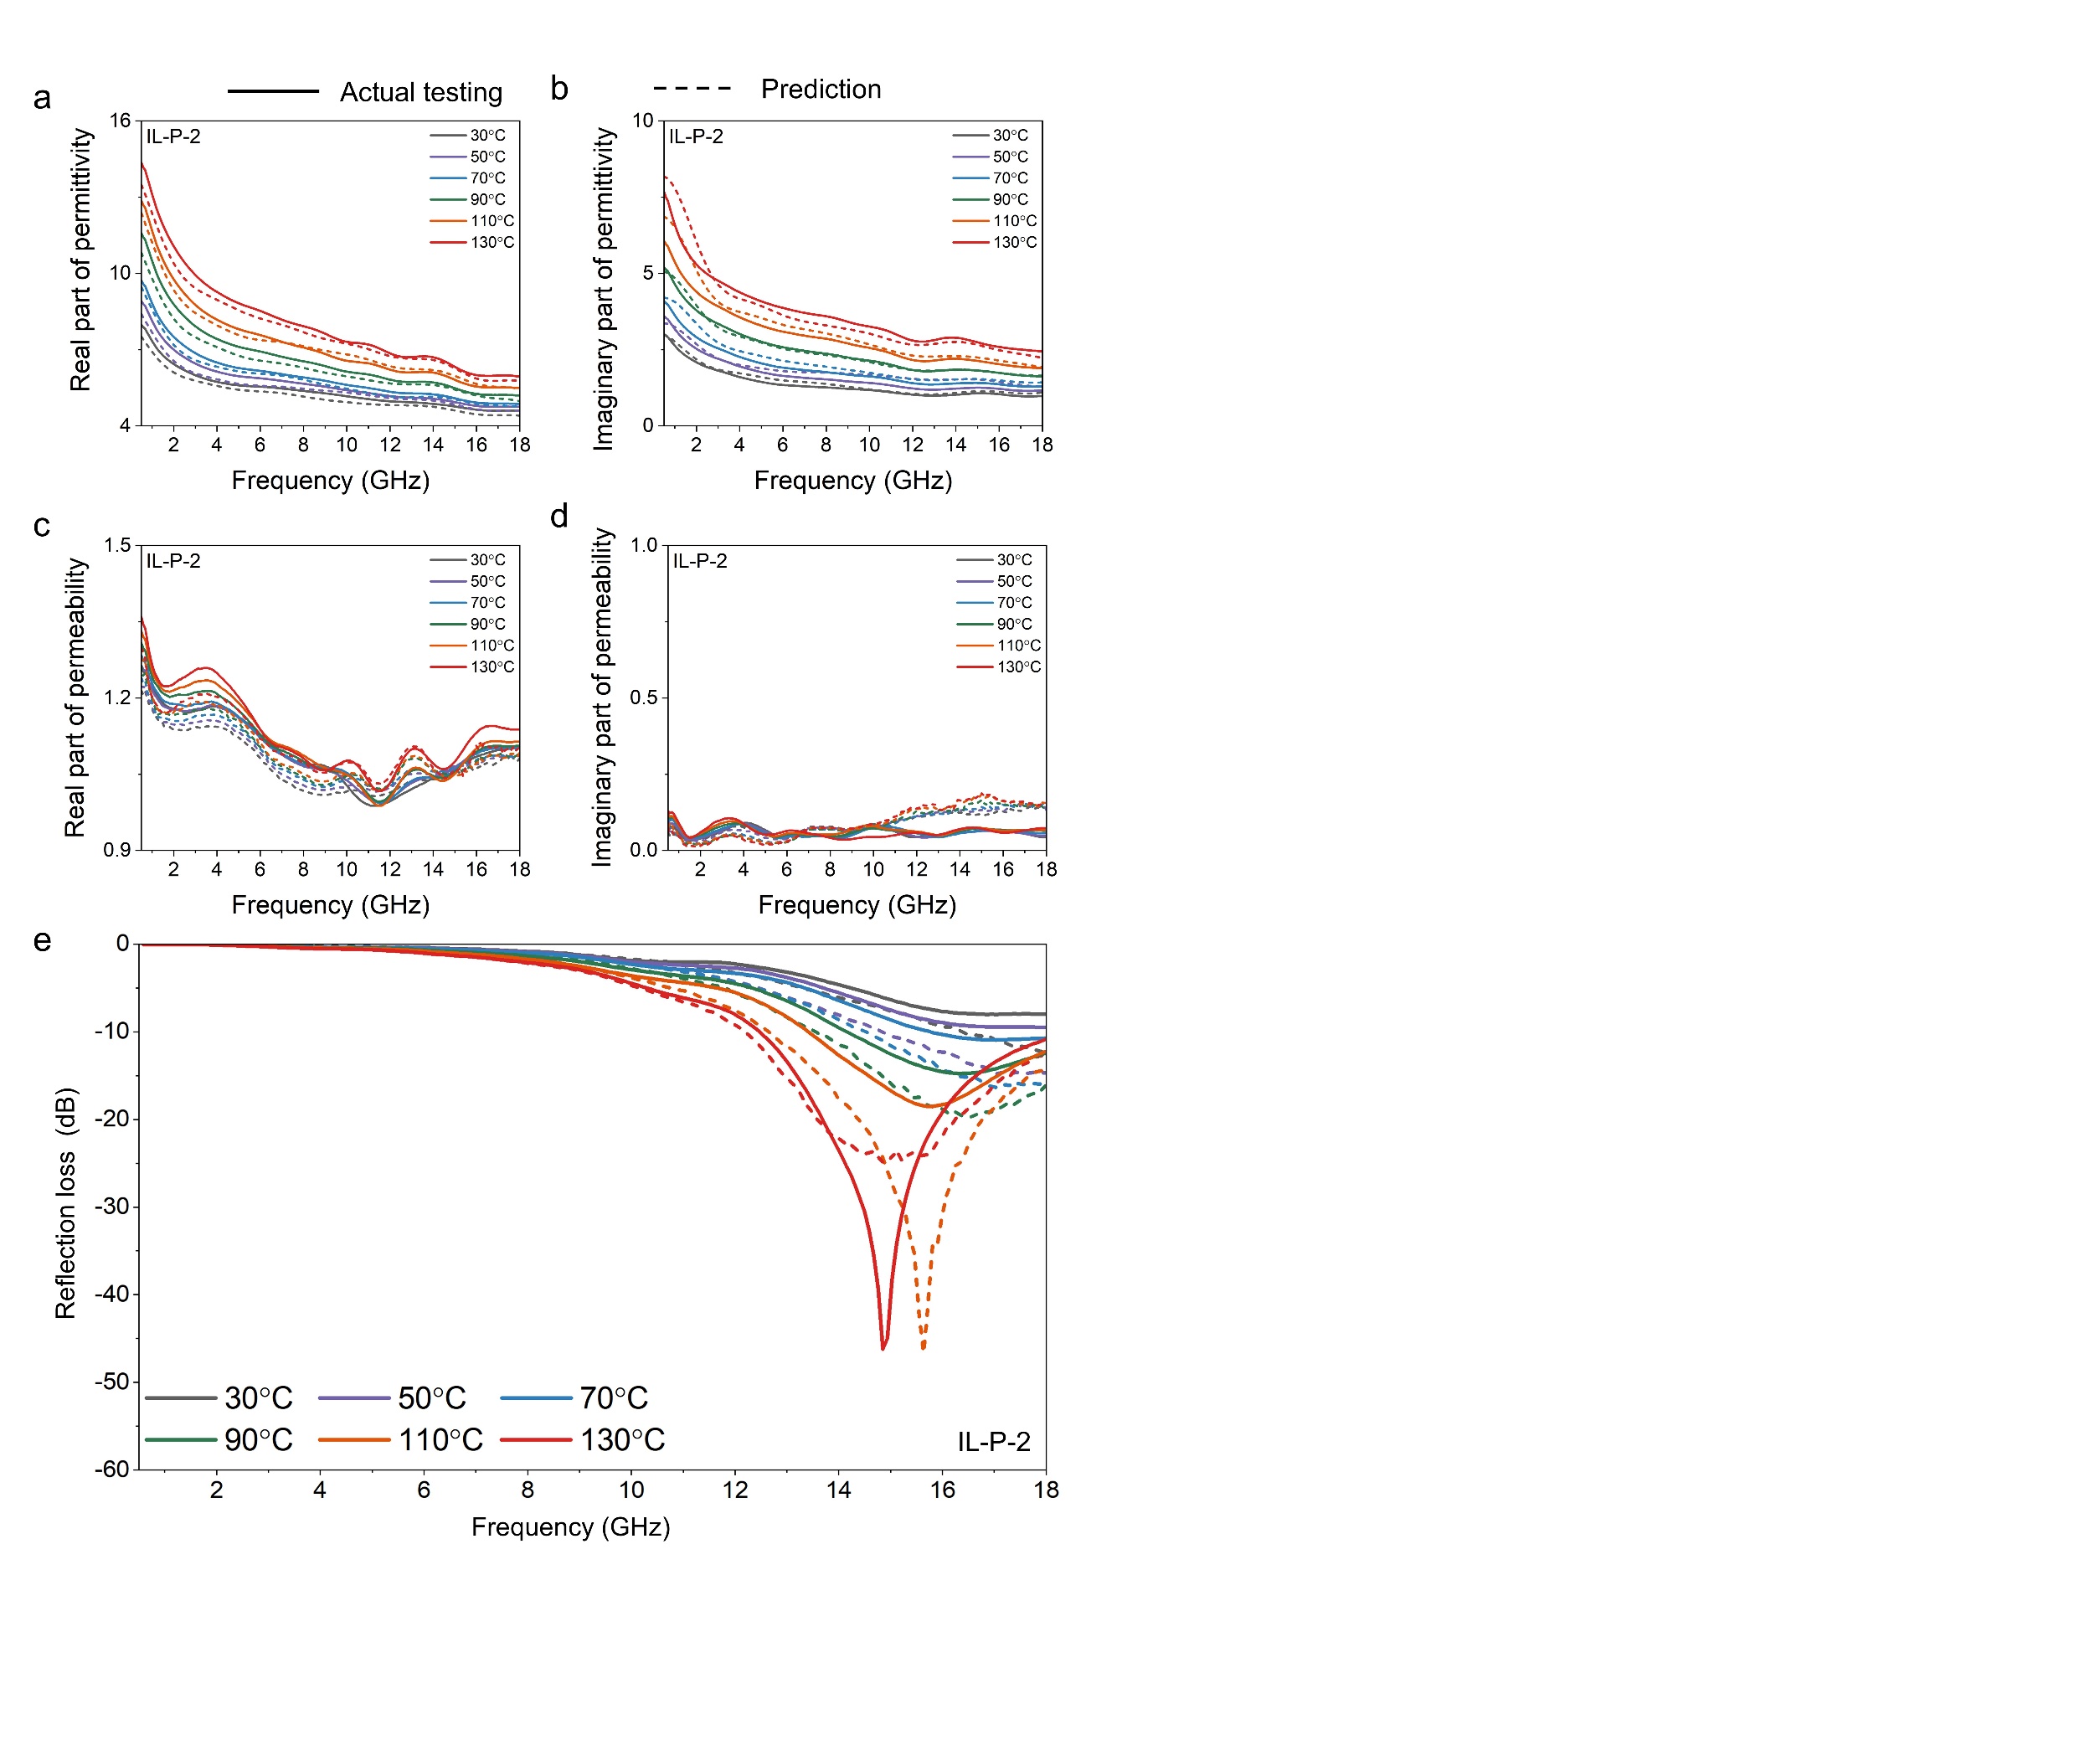
**

**Supplementary Fig. 16 | Comparison of predicted and actual results of electromagnetic parameters and reflection loss of IL-P-2 from 0.5-18 GHz at different temperatures. a** Real part of permittivity. **b** Imaginary part of permittivity. **c** Real part of the permeability. **d** Imaginary part of the permeability. **e** Reflection loss.

**
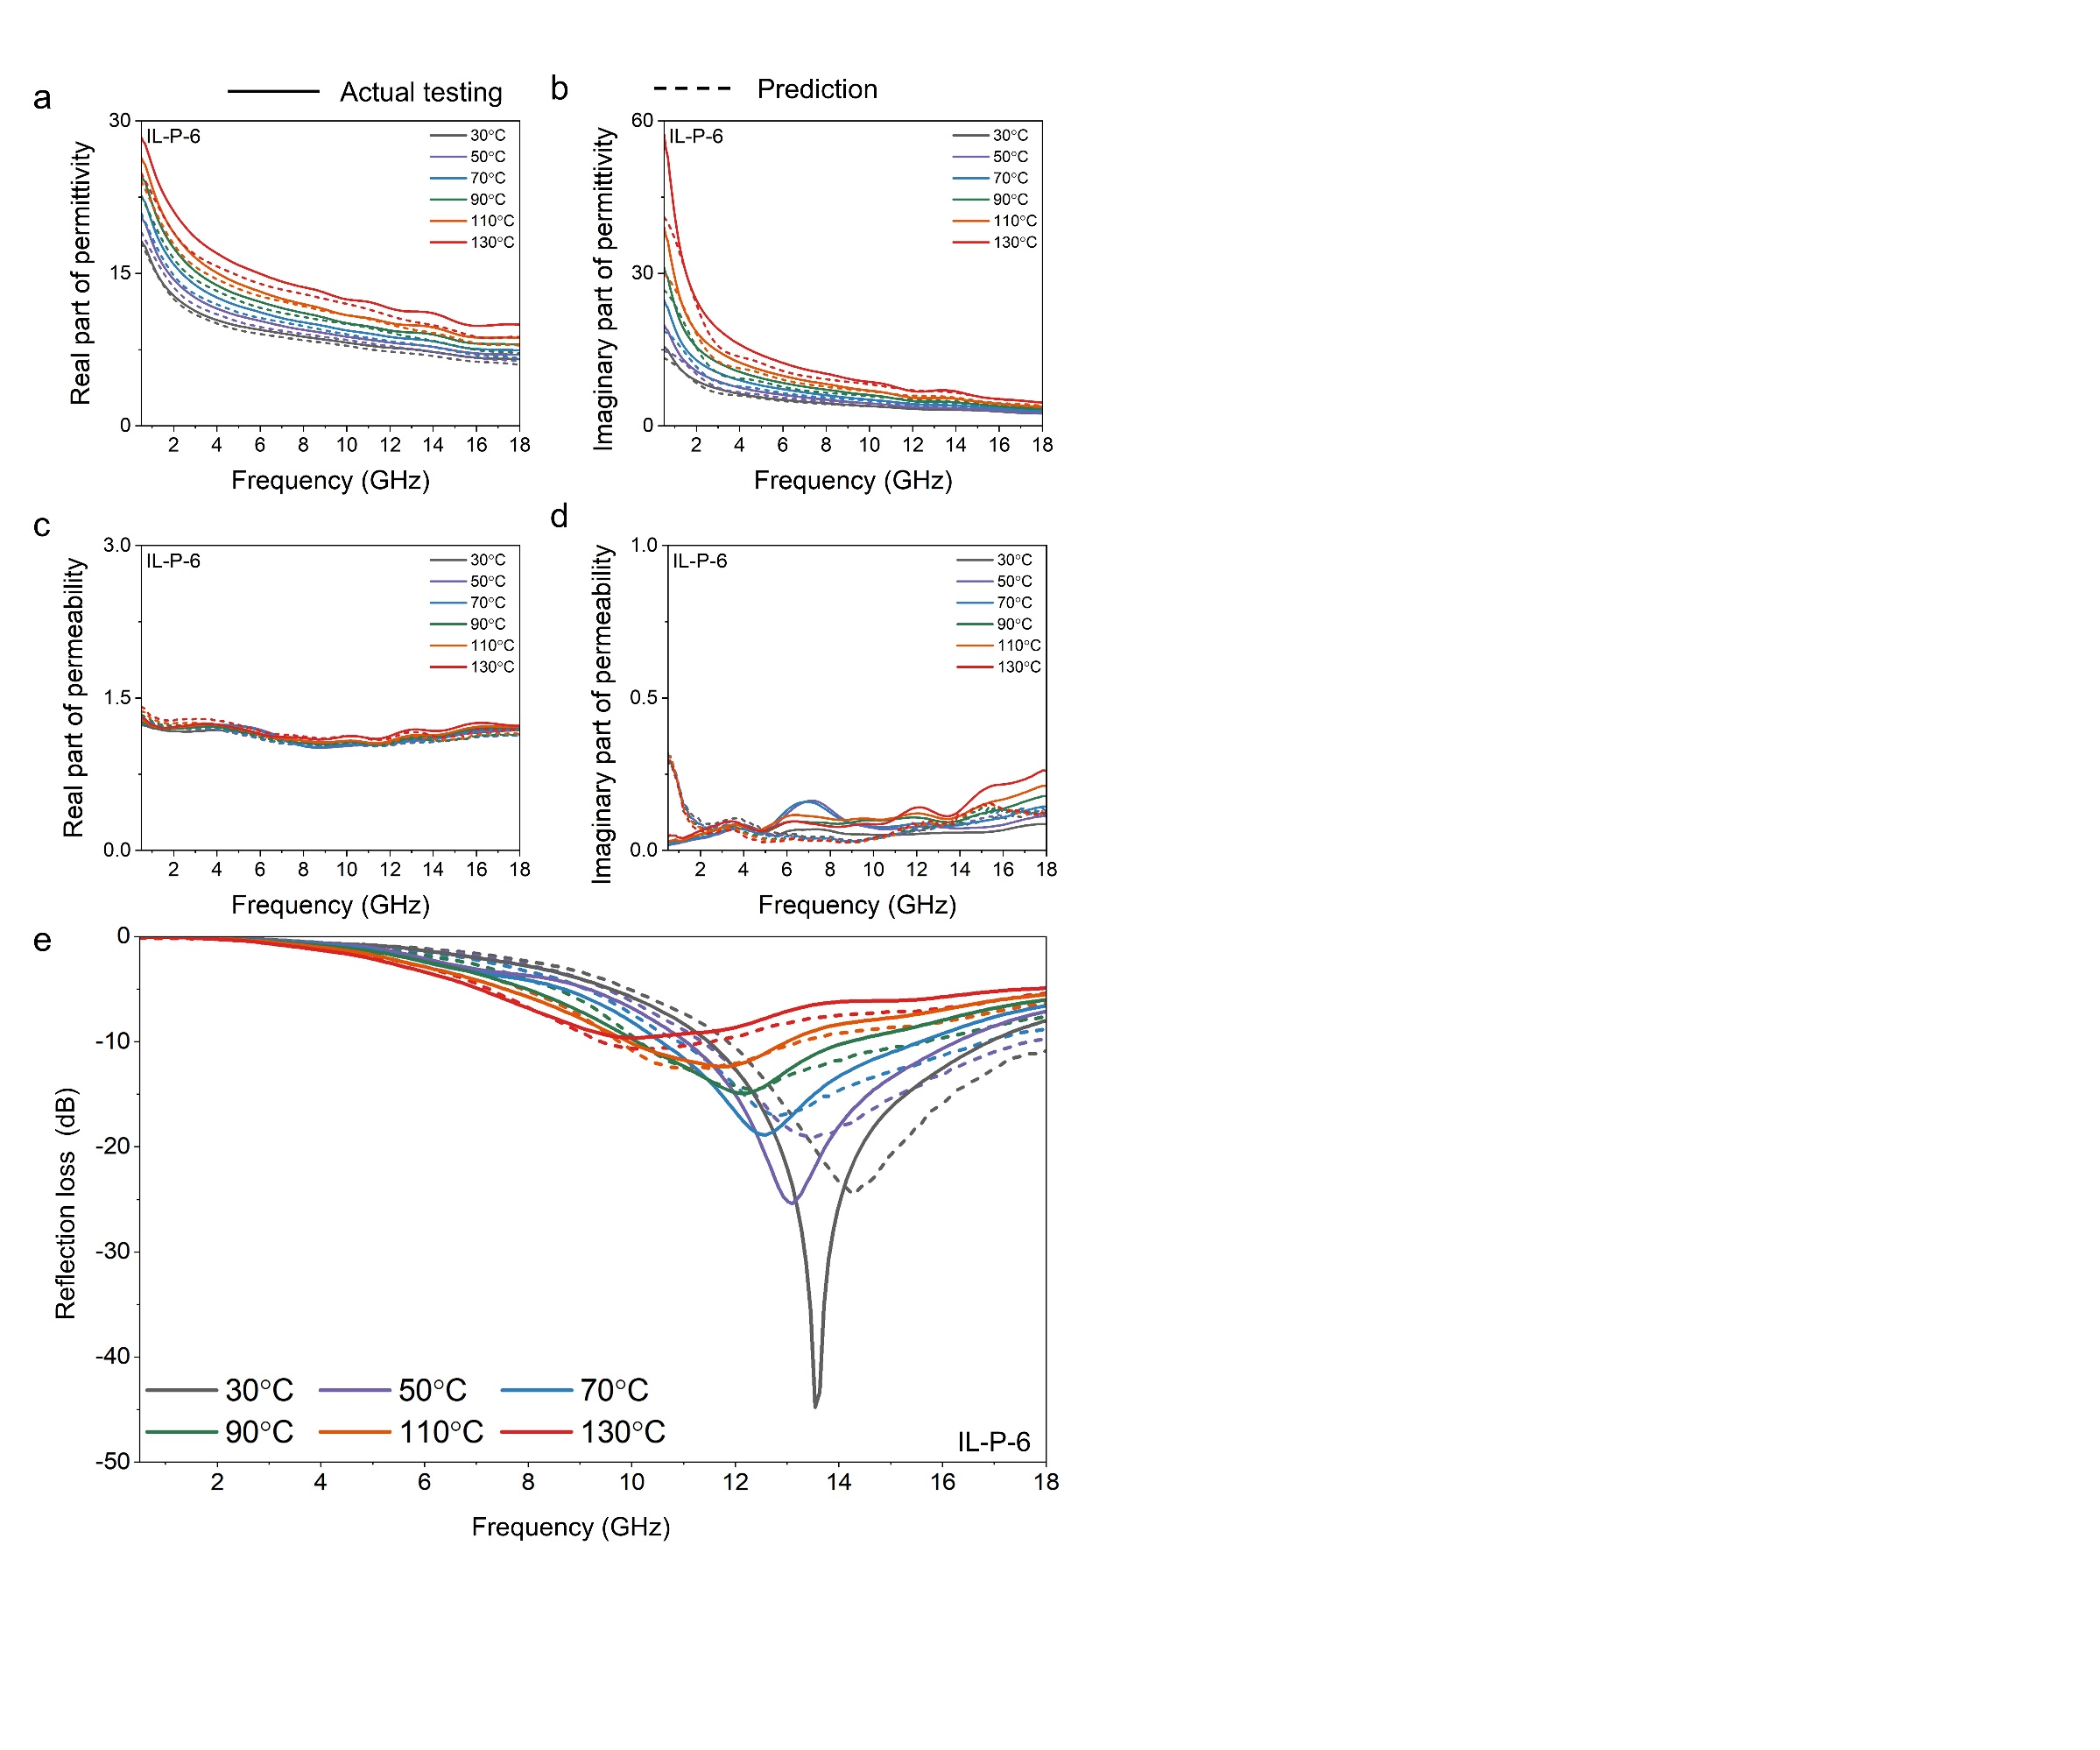
**

**Supplementary Fig. 17 | Comparison of predicted and actual results of electromagnetic parameters and reflection loss of IL-P-6 from 0.5-18 GHz at different temperatures. a** Real part of permittivity. **b** Imaginary part of permittivity. **c** Real part of the permeability. **d** Imaginary part of the permeability. **e** Reflection loss.


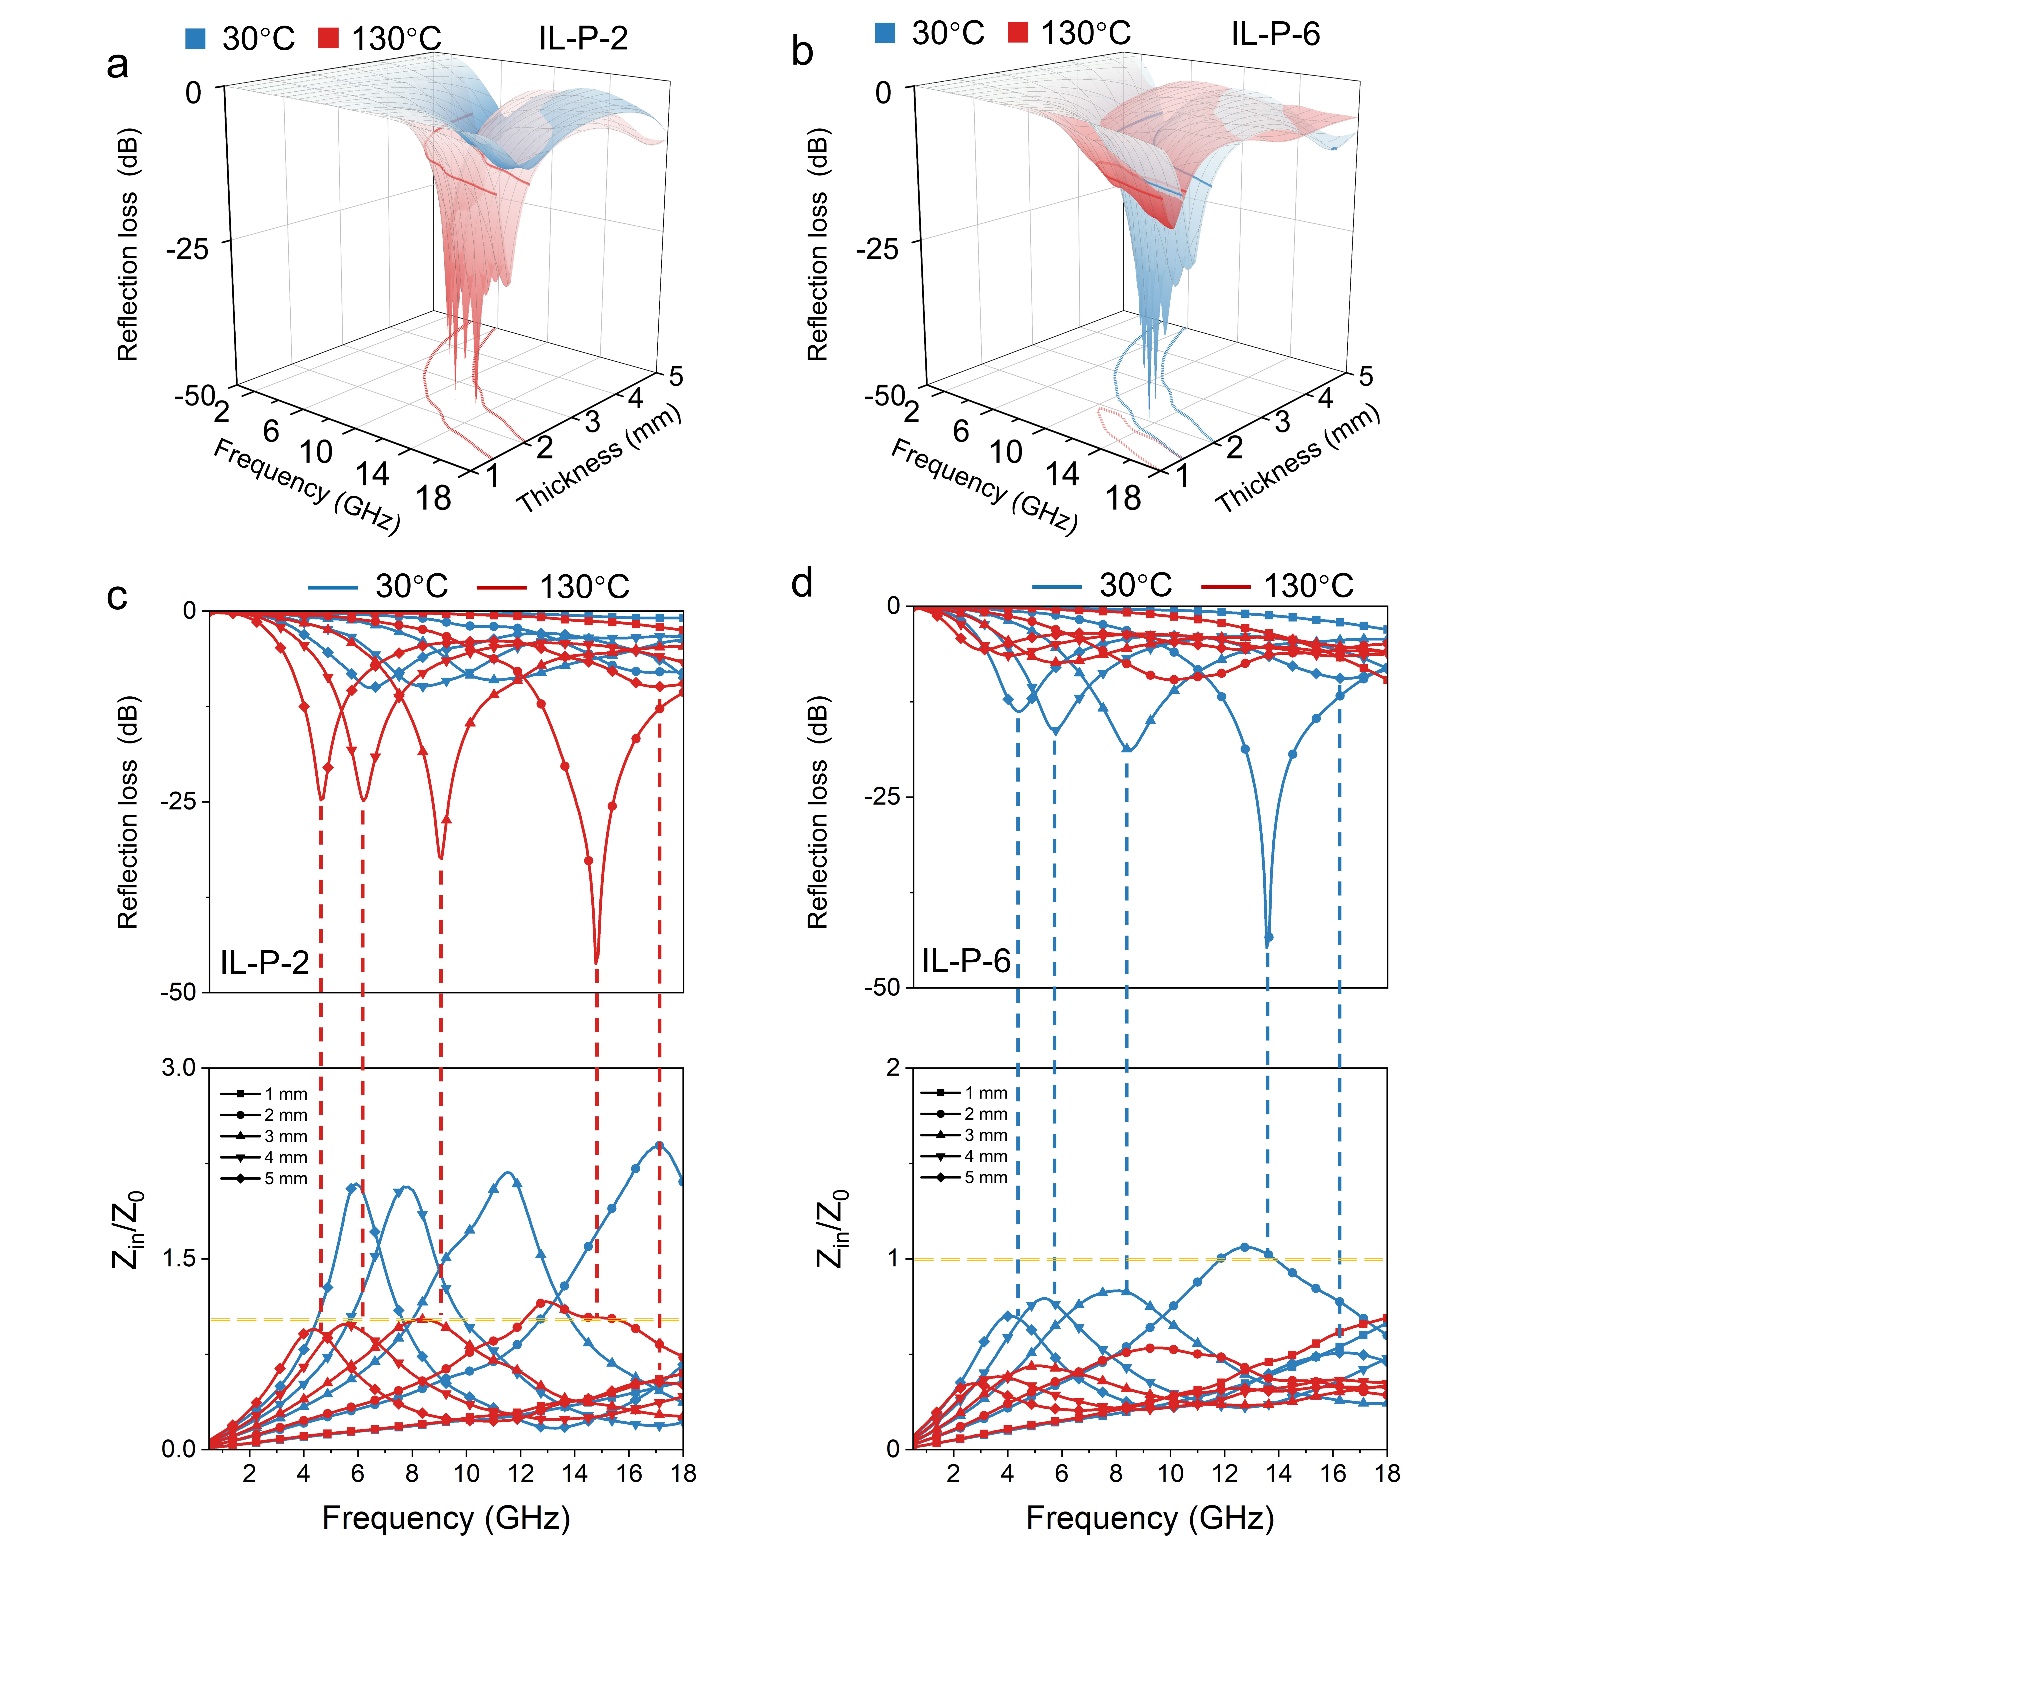


**Supplementary Fig. 18 | Effect of IL-P thickness on reflection loss. a** Reflection loss of IL-P-2 and IL-P-6 at different thicknesses in the 0.5–18 GHz range under temperature stimulation. **b** Zin/Z0 and corresponding reflection loss of IL-P-2 and IL-P-6 at different thicknesses at 30°C and 130°C.

**
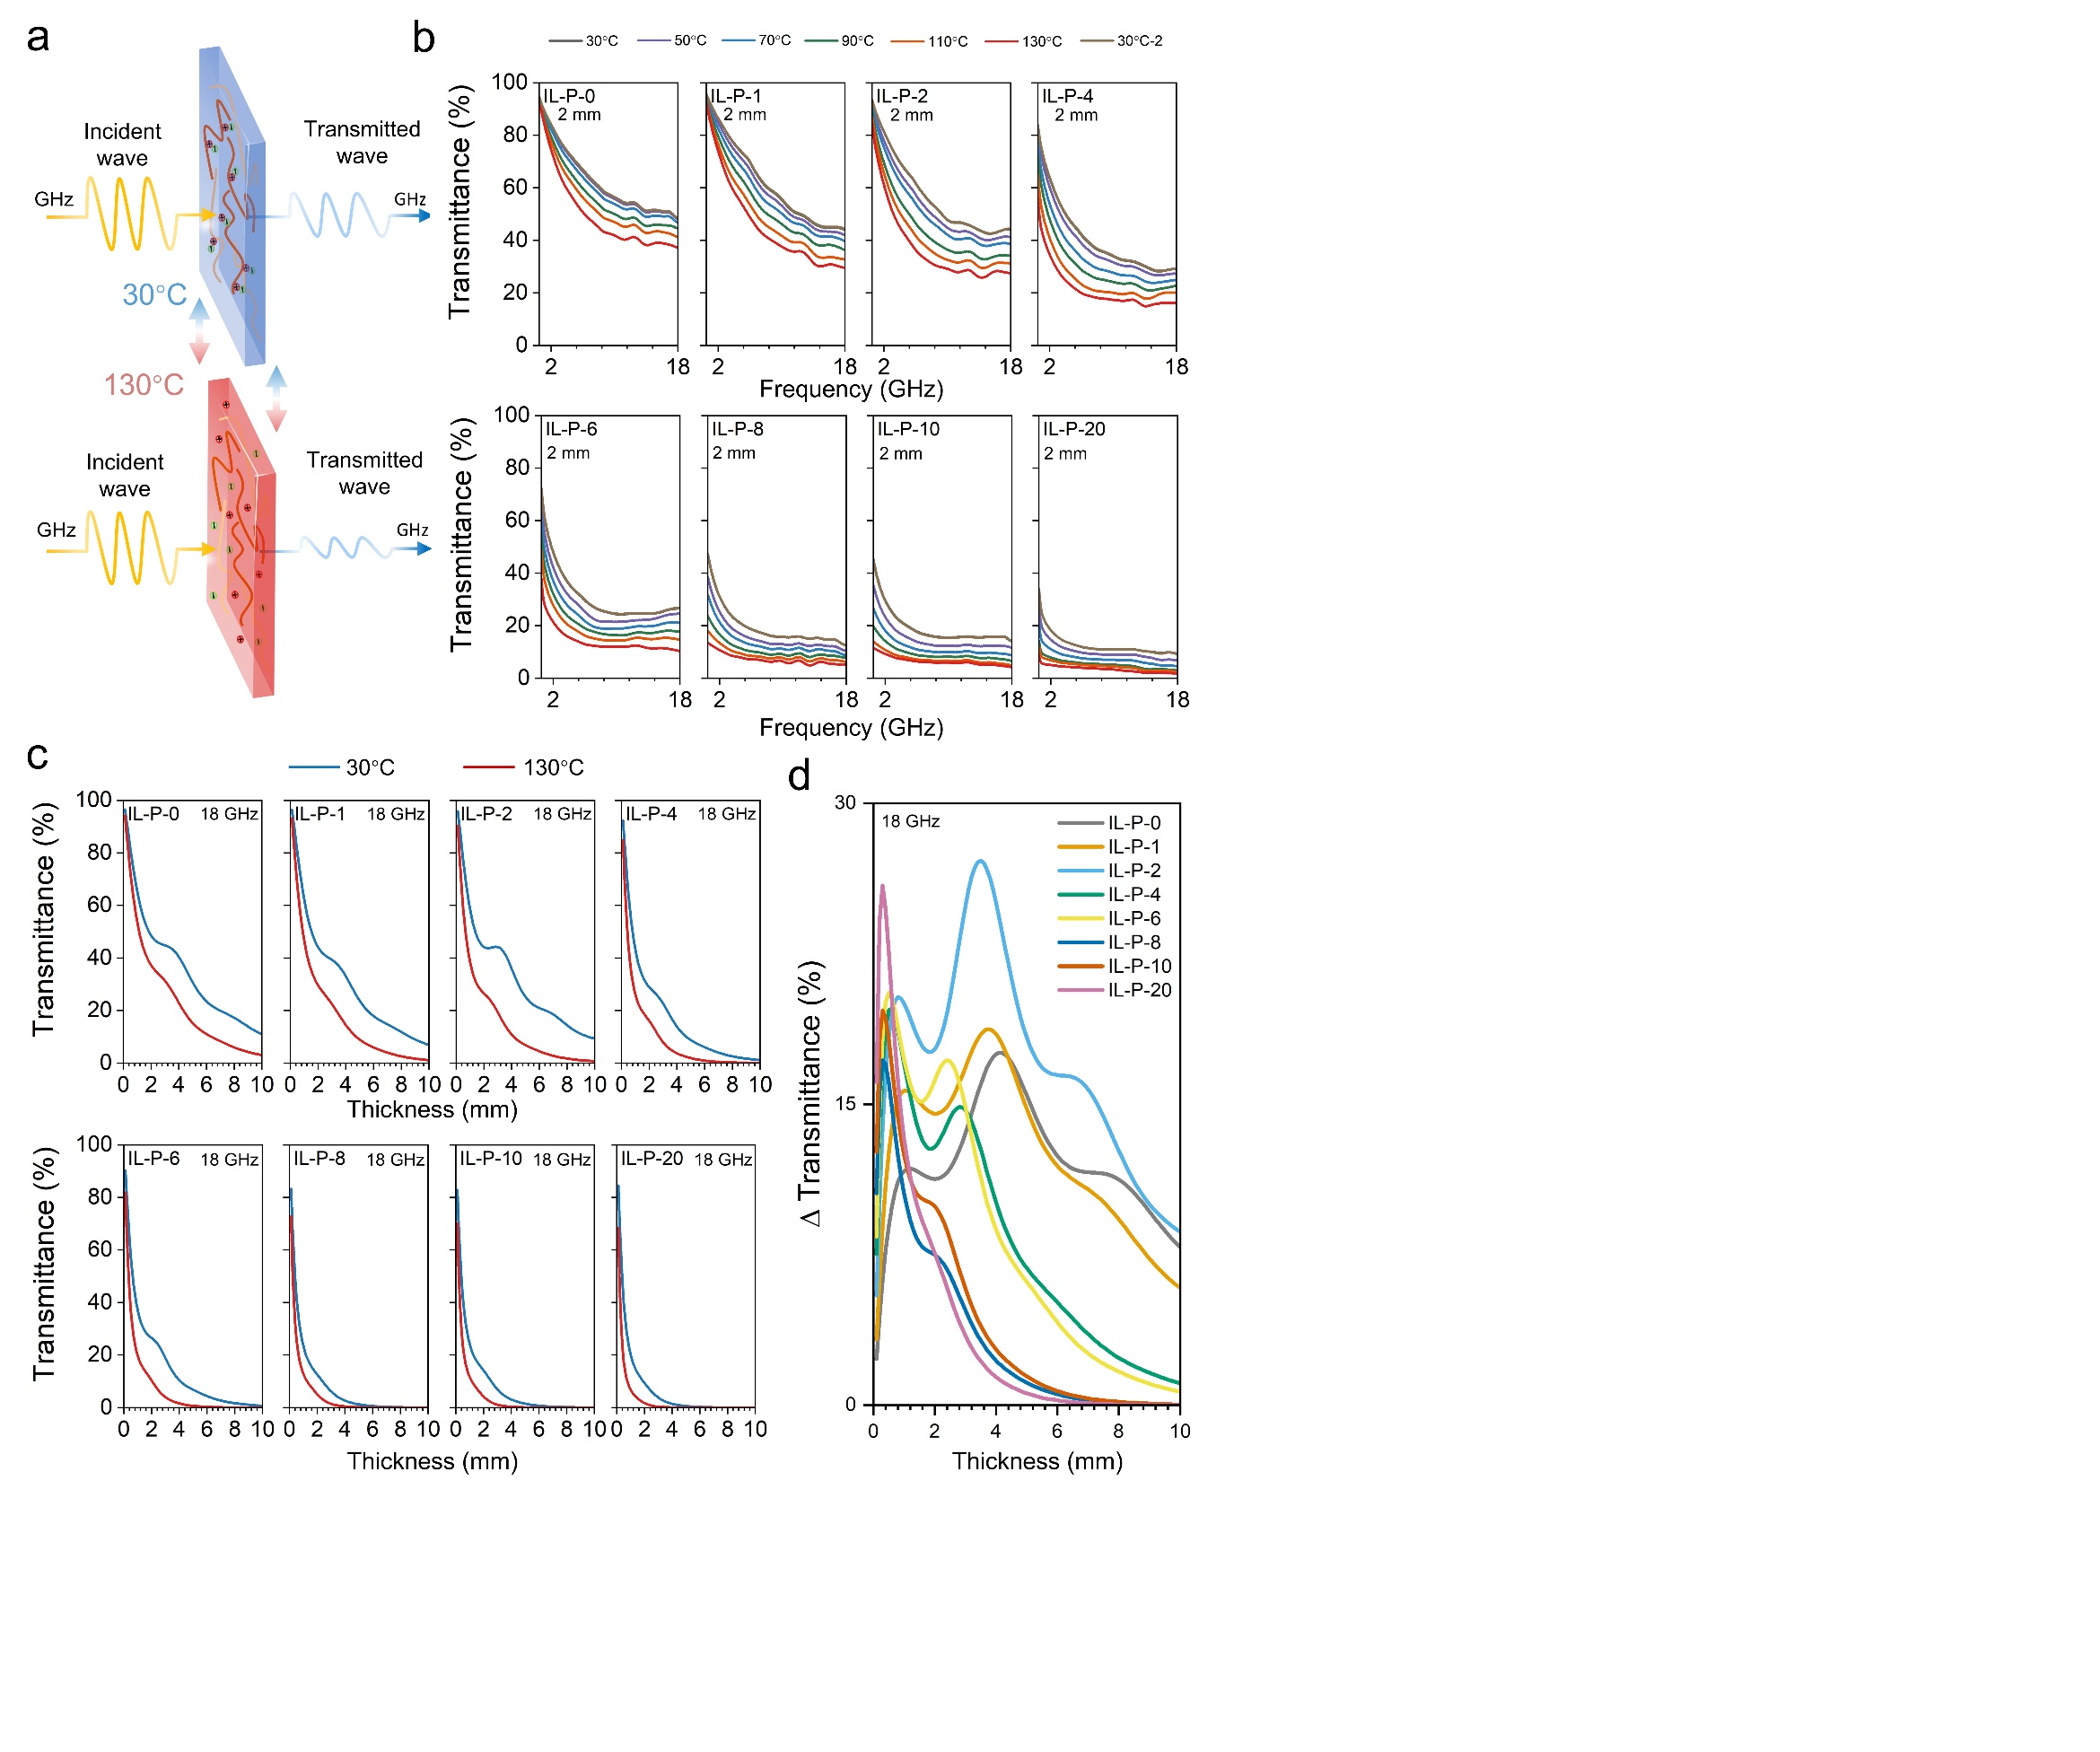
**

**Supplementary Fig. 19 | Transmission Properties of IL-P Active Surfaces.** **a** Schematic illustration of tunable transmission in IL-P. **b** Transmission rate of 2 mm-thick IL-P in the 0.5–18 GHz range under different temperature stimuli. **c** Transmission rate of IL-P with different thicknesses at 18 GHz at 30 °C and 130 °C. **d** Modulation amplitude of transmission rate for IL-P with different thicknesses at 18 GHz.


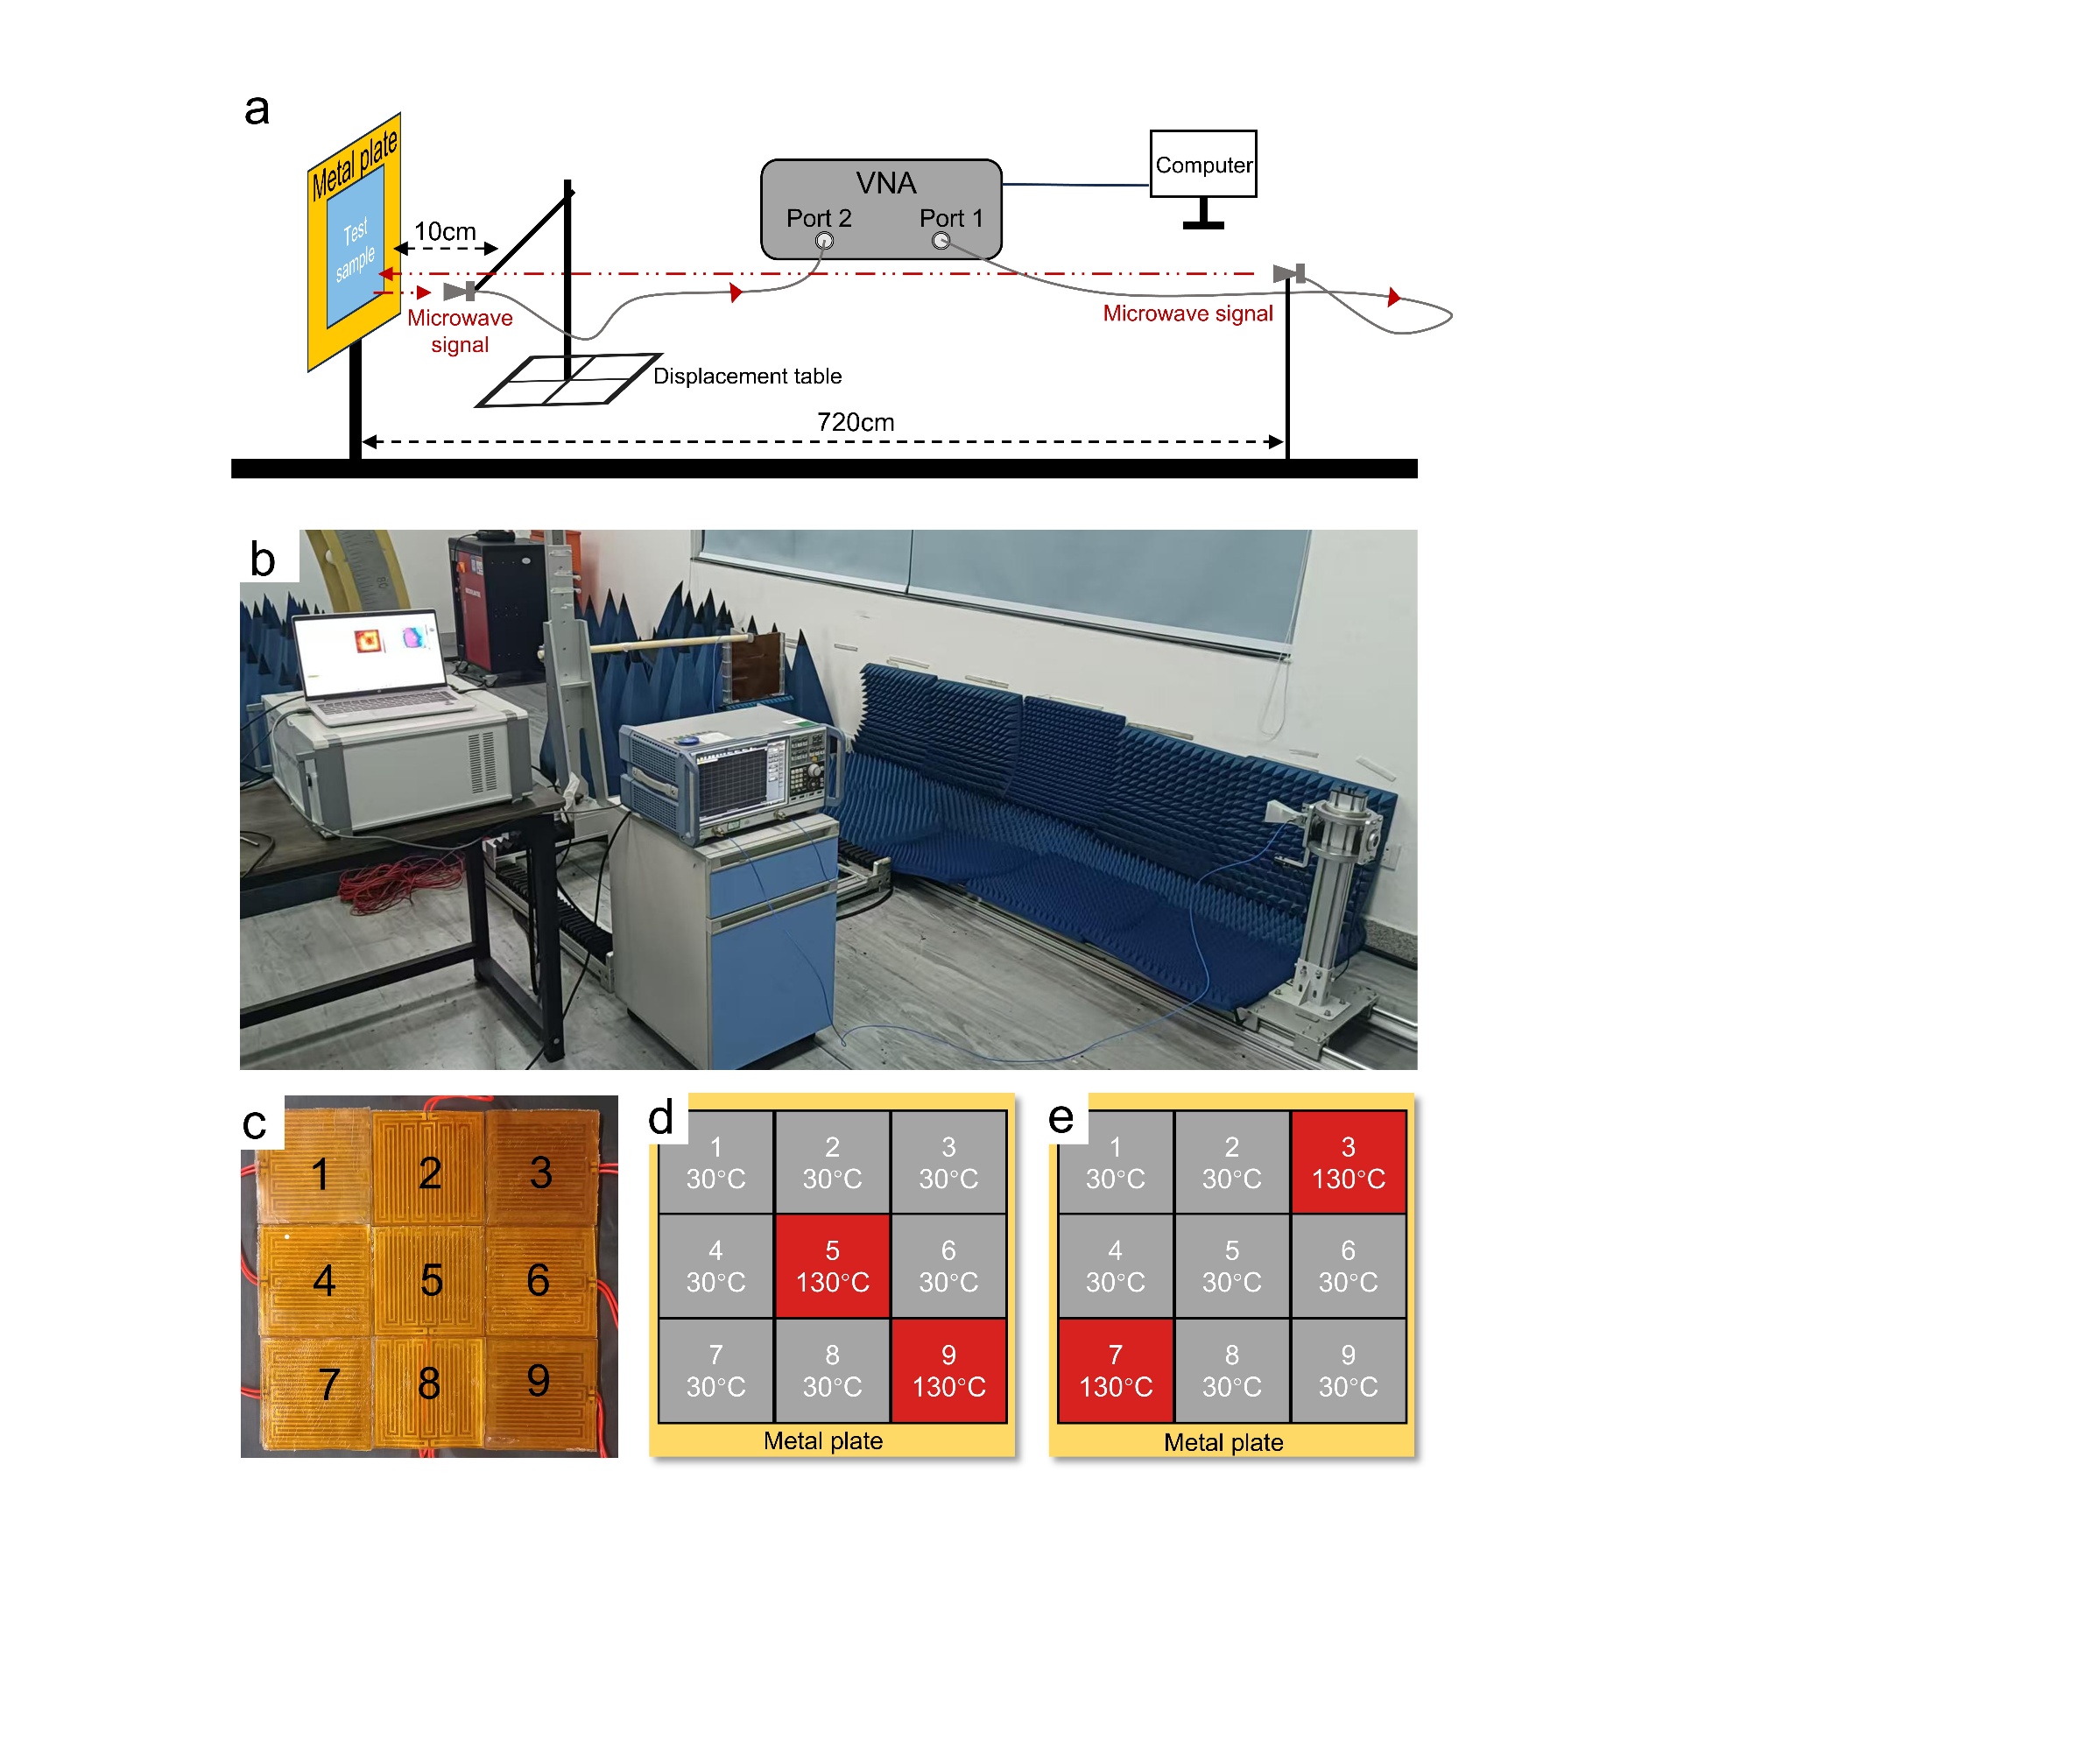


**Supplementary Fig. 20 | Pixelated microwave absorbing surface imaging. a** Schematic of far-field imaging test. **b** Far-field imaging system. **c** Far-field imaging model. **d, e** Schematic of pixelated imaging control under temperature stimulation.


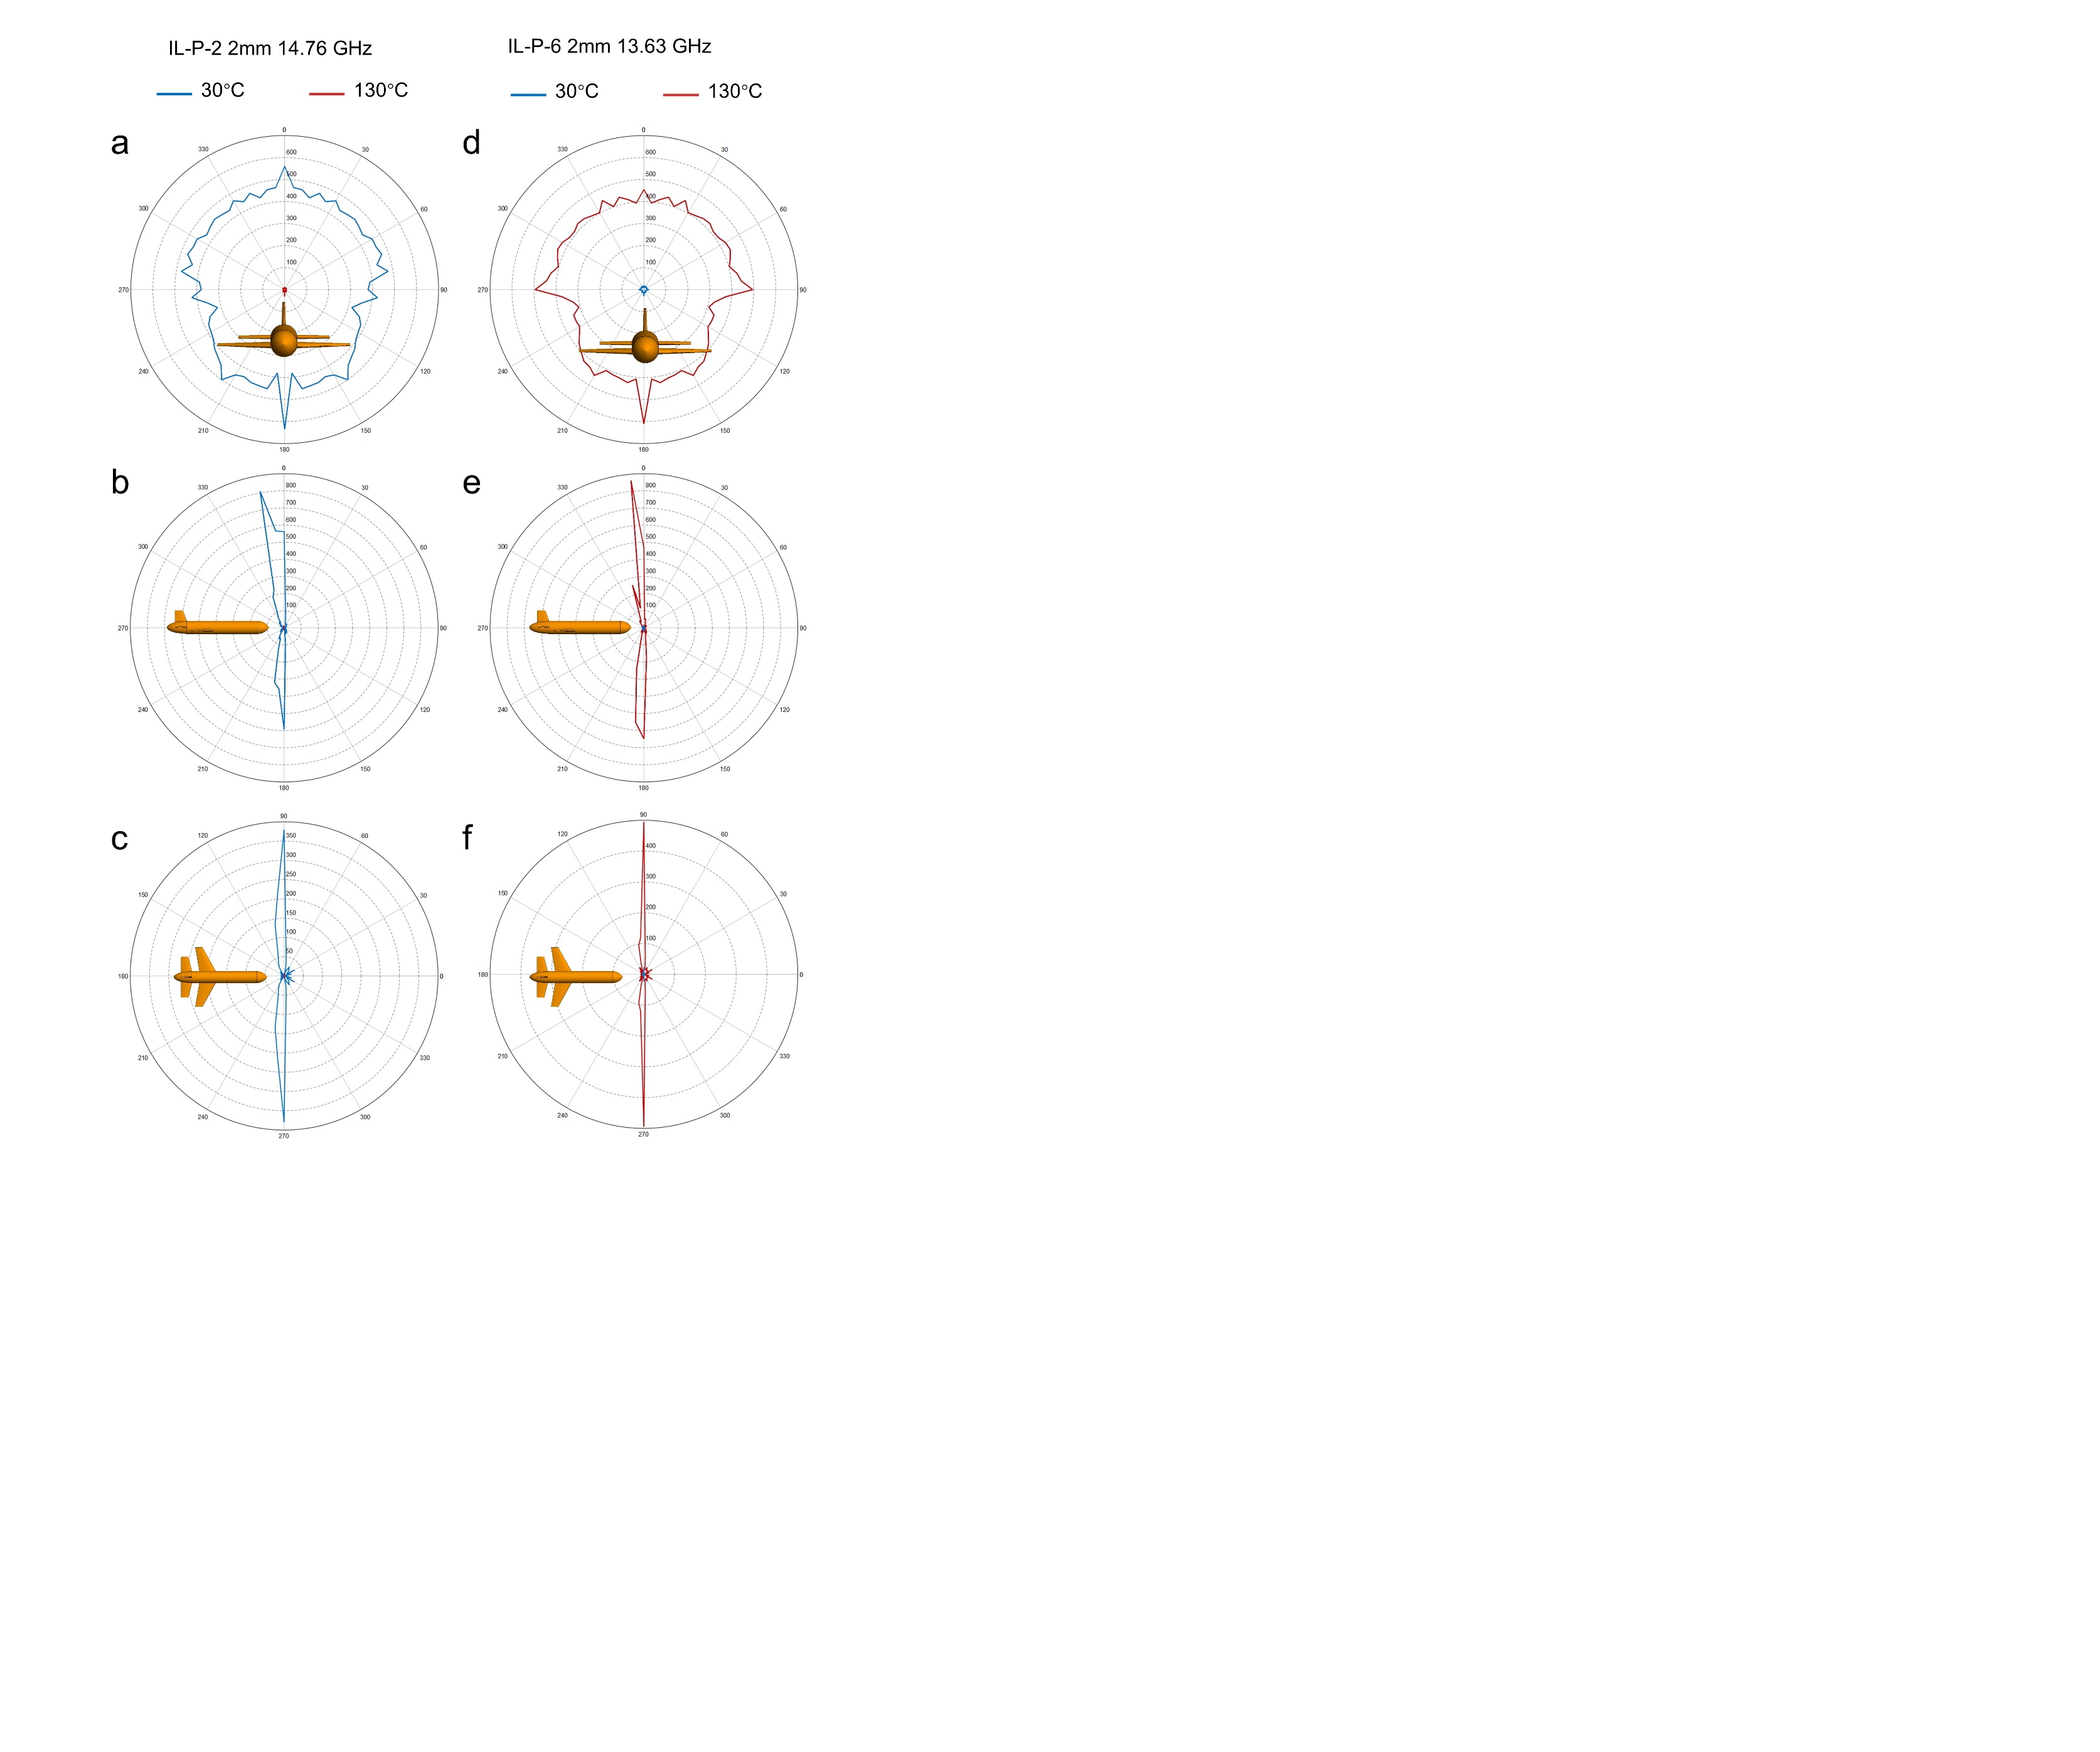


**Supplementary Fig. 21 |** **Switchable RCS on the aircraft surface. a-c** Simulated RCS results of 2 mm-thick IL-P-2 at different cross-sections at 30°C and 130°C. **d-f** Simulated RCS results of 2 mm-thick IL-P-6 at different cross-sections at 30°C and 130°C.


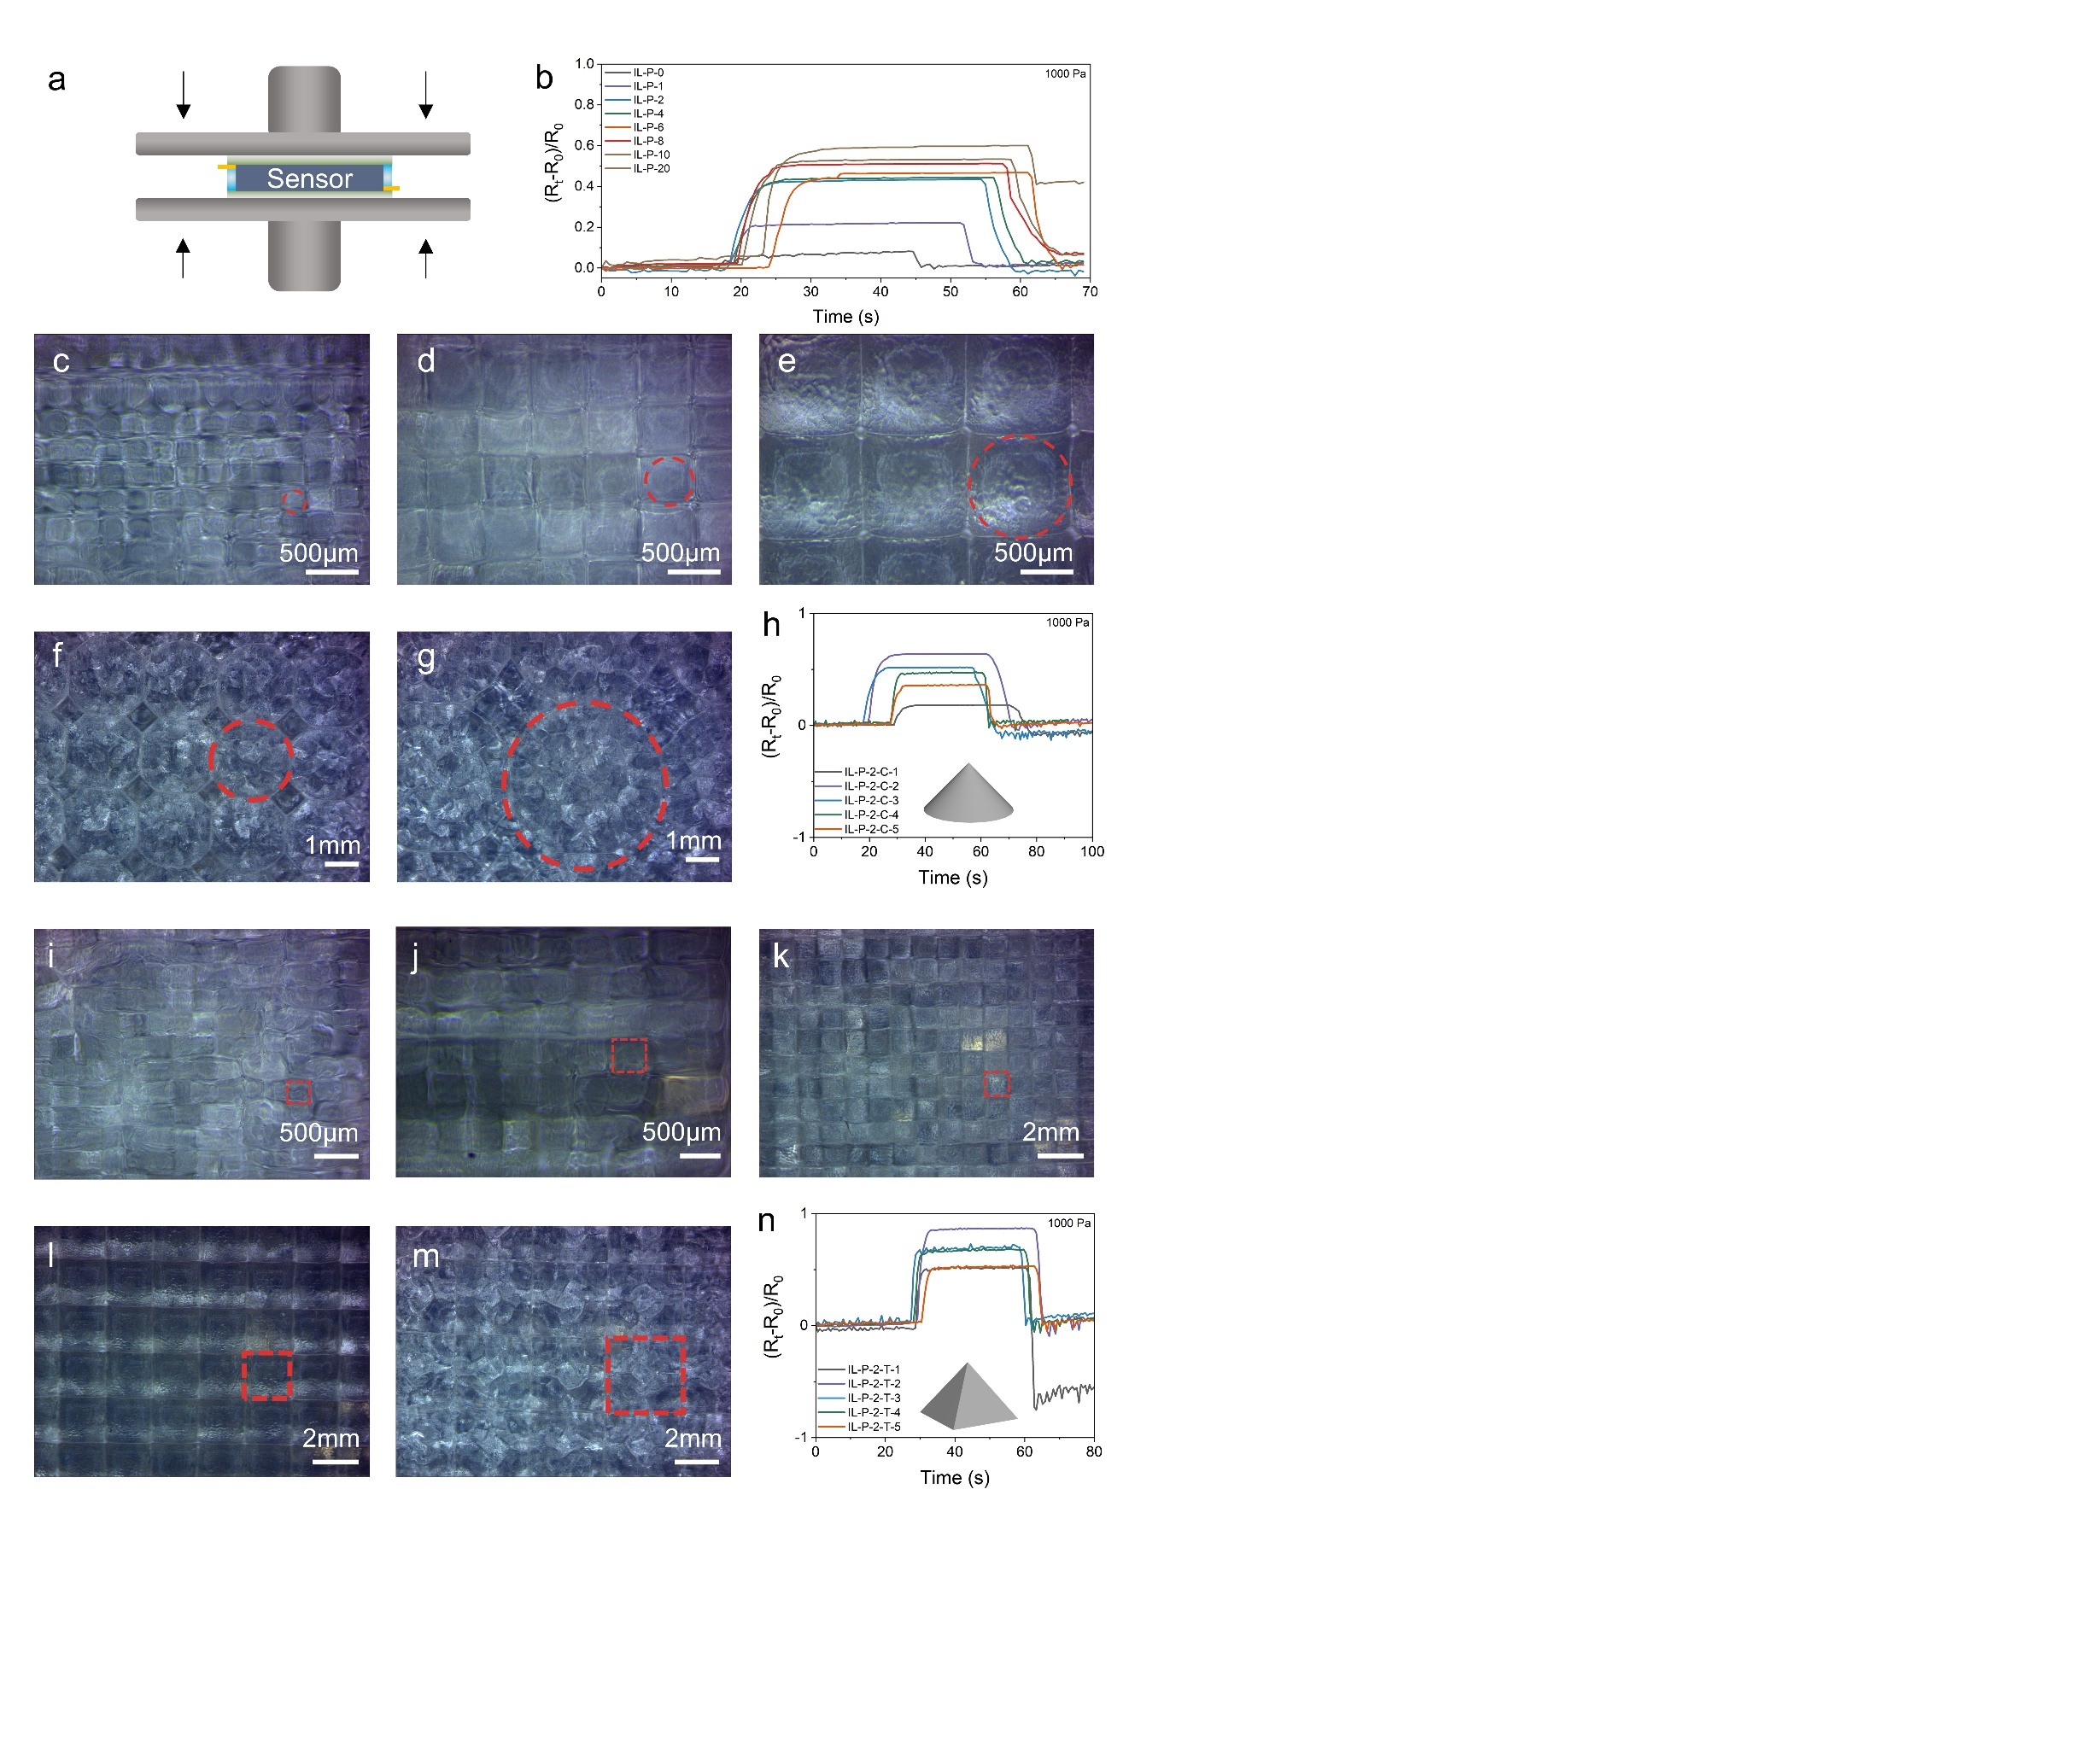


**Supplementary Fig. 22 | IL-P capacitive mechanical sensors. a** Schematic of IL-P sensor module testing. **b** Dynamic mechanical sensing performance of IL-P sensing materials with different IL concentrations and 500 µm thickness. **c-h** Microscopic morphology and sensing performance of IL-P-2-C with different radii of the conical shape. **i-n** Microscopic morphology and sensing performance of IL-P-2-T with different lengths of the truncated conical shape.


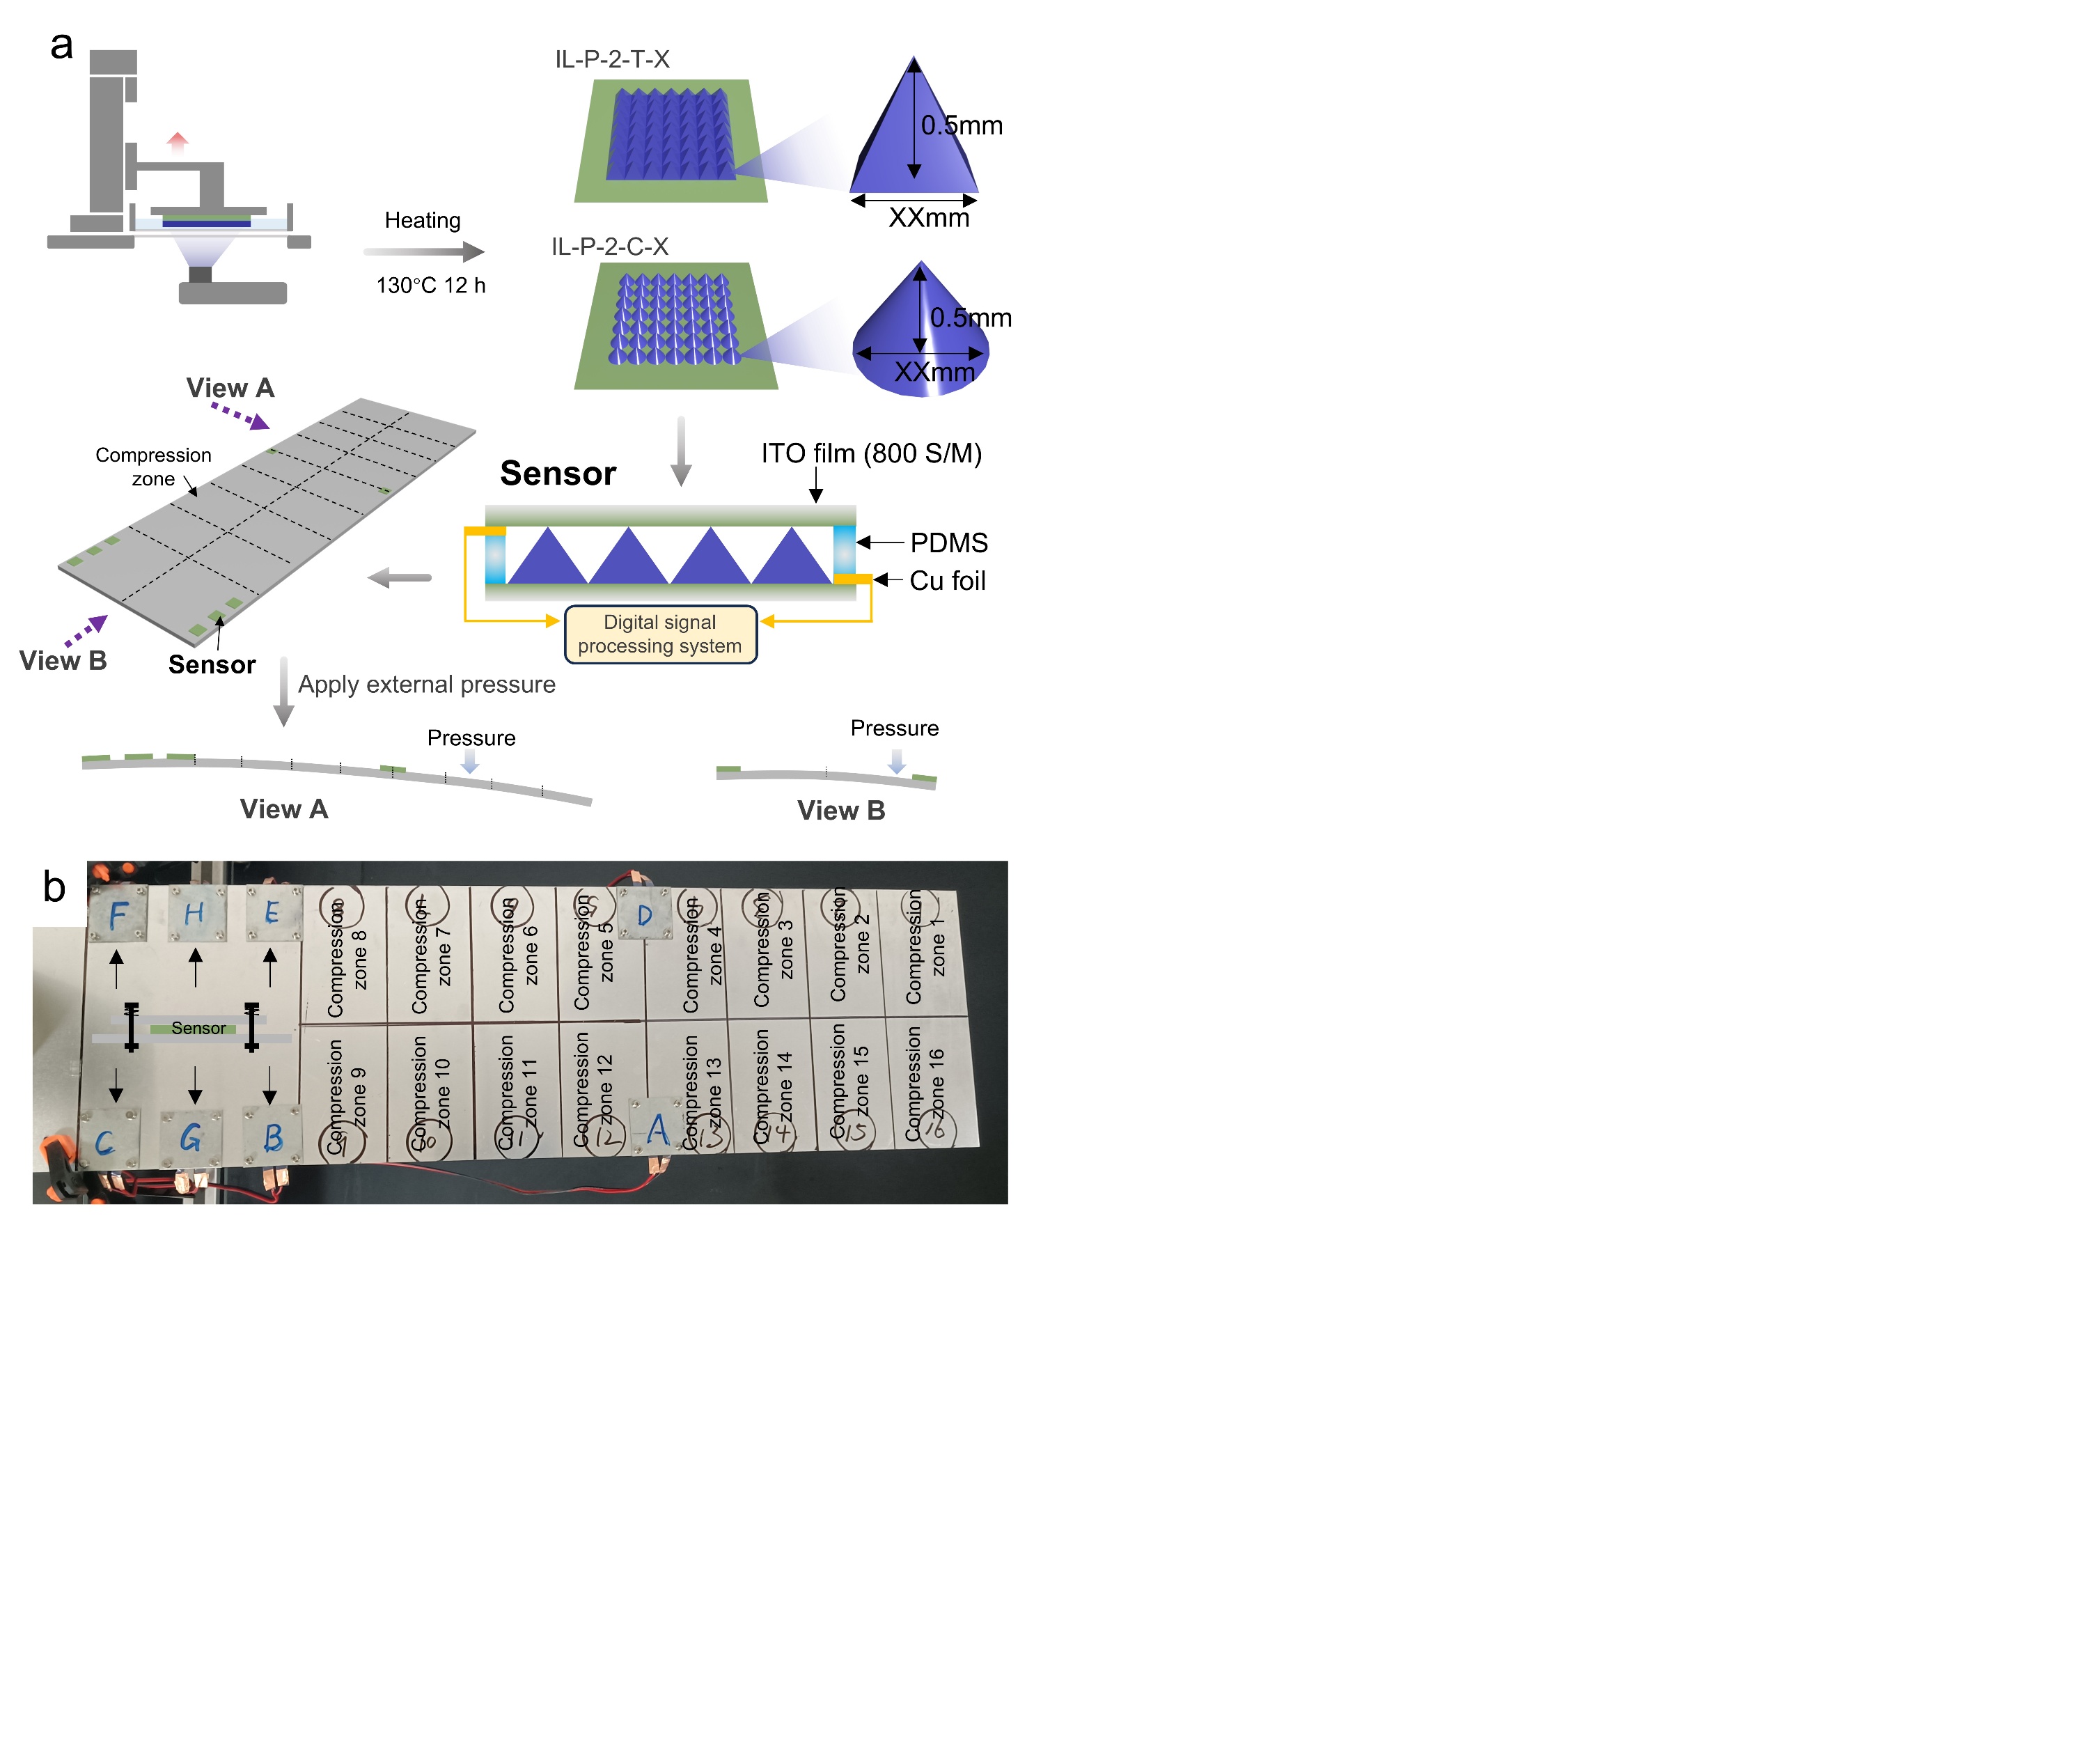


**Supplementary Fig. 23 | Self-sensing surface of IL-P. a** Schematic of IL-P sensor module and self-sensing surface fabrication. **b** Self-sensing surface composed of IL-P sensor array.

References

1 Zhang, X. et al. Metal-organic frameworks with fine-tuned interlayer spacing for microwave absorption. *Sci. Adv.* **10**, eadl6498 (2024).

2 Grosse, C. A program for the fitting of up to three Havriliak-Negami dispersions to dielectric data. *J. Colloid Interface Sci.* **600**, 318-323 (2021).

3 Zhang, Y. et al. An Urchin-Inspired Broadband and Ultralight Microwave Absorber. *Adv. Funct. Mater.* **35**, 2419943 (2025).

4 Gong, X. et al. Trunk-Inspired SWCNT-Based Wrinkled Films for Highly-Stretchable Electromagnetic Interference Shielding and Wearable Thermotherapy. *Nano-Micro. Lett.* **16**, 243 (2024).

5 Yan, H. et al. Dielectric–magnetic synergistic design of Ti3C2Tx@C/NiZn ferrite composite for effective microwave absorption performance. *Appl. Surf. Sci.* **633**, 157602 (2023).

6 Tian, W. et al. Atomic-Scale Layer-by-Layer Deposition of FeSiAl@ZnO@Al2O3 Hybrid with Threshold Anti-Corrosion and Ultra-High Microwave Absorption Properties in Low-Frequency Bands. *Nano-Micro. Lett.* **13**, 161 (2021).

7 Dai, Y., Wu, X., Liu, Z., Zhang, H. B. & Yu, Z. Z. Highly sensitive, robust and anisotropic MXene aerogels for efficient broadband microwave absorption. *Compos. Part B-Eng.* **200**, 108263 (2020).

8 Cheng, Z. et al. Intelligent Off/On Switchable Microwave Absorption Performance of Reduced Graphene Oxide/VO2 Composite Aerogel. *Adv. Funct. Mater.* **32**, 2205160 (2022).

9 Duan, L. et al. Electron Migratory Polarization of Interfacial Electric Fields Facilitates Efficient Microwave Absorption. *Adv. Funct. Mater.* **35**, 2416727 (2025).
